# Supplementary material for: Quantifying flattening distortion on the thermodynamics and kinetics of electron transfers of Cu(i) photoredox catalysts
Source: Royal Society of Chemistry journal article supplement (doi:10.1039/d4qi00613e), 2024-01-01
Supplement: d4qi00613e1.pdf [file d4qi00613e1.pdf]

# Quantifying flattening distortion on the thermodynamics and kinetics of electron transfers of Cu(I) photoredox catalysts

*Christian Sandoval–Pauker<sup>†</sup>, Gabriela Molina–Aguirre<sup>†</sup>, Dino Villagrán<sup>†,\*</sup> and Balazs Pinter<sup>†,‡,\*</sup>*

<sup>†</sup>Department of Chemistry and Biochemistry, The University of Texas at El Paso, El Paso, TX, 79968,  
USA, dino@utep.edu, bpinter@utep.edu

<sup>‡</sup>Current affiliation: European Research Council Executive Agency. Disclaimer: The views expressed are purely those of the authors and may not in any circumstances be regarded as stating an official position of the ERCEA and the European Commission.

## Table of Contents

|                                                                                                                              |    |
|------------------------------------------------------------------------------------------------------------------------------|----|
| 1. Calculated and experimental X-ray structural metrics.....                                                                 | 2  |
| 2. Calculated and experimental ground- and excited-state reduction potentials in MeCN.....                                   | 7  |
| 3. Condensed spin density populations for T <sub>1</sub> , D <sup>ox</sup> and D <sup>red</sup> states of complexes 1-9..... | 7  |
| 4. Computational protocol for the calculation of reduction potentials.....                                                   | 9  |
| 5. Homodesmotic reactions.....                                                                                               | 18 |
| 6. Calculated structural metrics.....                                                                                        | 20 |
| 7. Theoretical square schemes .....                                                                                          | 25 |
| 8. Internal reorganization energies for the electron self-exchange reaction .....                                            | 27 |
| 9. Cartesian coordinates of optimized structures .....                                                                       | 33 |
| 5. References.....                                                                                                           | 86 |

## 1. Calculated and experimental X-ray structural metrics

**Table S1.** Experimental and calculated distances for the Cu(I) cation **2** ( $S_0$ ). Hydrogen atoms attached to carbons are omitted for clarity (TPSSH-D3/def2-TZVP(-f)/defgrid2)

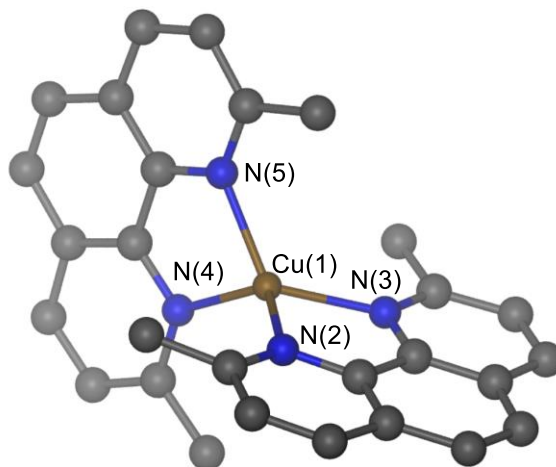

| Bond            | Length (exp.) (Å) | Length (calc.) (Å) | $\Delta$ (Å) |
|-----------------|-------------------|--------------------|--------------|
| Cu(1)–N(2)      | 2.028             | 2.029              | 0.001        |
| Cu(1)–N(3)      | 2.070             | 2.025              | 0.045        |
| Cu(1)–N(4)      | 2.042             | 2.025              | 0.017        |
| Cu(1)–N(5)      | 2.053             | 2.026              | 0.027        |
| Angle           | Angle (exp.) (°)  | Angle (calc.) (°)  | $\Delta$ (°) |
| N(2)–Cu(1)–N(3) | 82                | 83                 | 1            |
| N(2)–Cu(1)–N(4) | 128               | 123                | 5            |
| N(2)–Cu(1)–N(5) | 132               | 125                | 7            |
| N(3)–Cu(1)–N(4) | 127               | 126                | 1            |
| N(3)–Cu(1)–N(5) | 111               | 123                | 12           |
| N(4)–Cu(1)–N(5) | 82                | 83                 | 1            |
| $\Theta$        | 80                | 88                 | 8            |
| $\beta$         | 133               | 138                | 5            |
| $\gamma$        | 144               | 139                | 5            |

\*Experimental XRD structural metrics from ref. 1

**Table S2.** Experimental and calculated distances for the Cu(I) cation **3** (**S<sub>0</sub>**). Hydrogen atoms attached to carbons are omitted for clarity (TPSSh-D3/def2-TZVP(-f)/defgrid2)

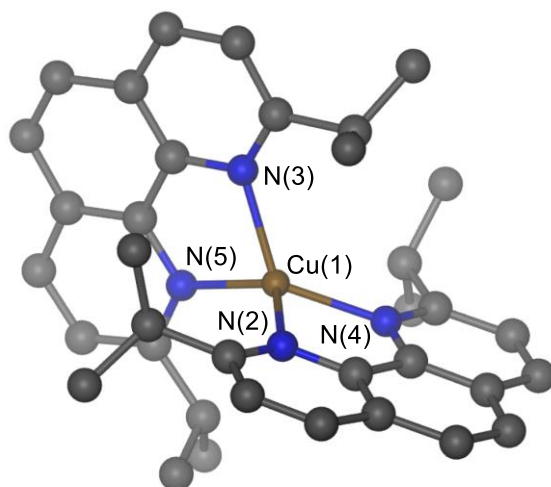

| <b>Bond</b>     | <b>Length (exp.) (Å)</b> | <b>Length (calc.) (Å)</b> | <b>Δ (Å)</b> |
|-----------------|--------------------------|---------------------------|--------------|
| Cu(1)–N(2)      | 2.067                    | 2.046                     | 0.021        |
| Cu(1)–N(3)      | 2.053                    | 2.043                     | 0.010        |
| Cu(1)–N(4)      | 2.006                    | 2.016                     | 0.010        |
| Cu(1)–N(5)      | 2.020                    | 2.019                     | 0.001        |
| <b>Angle</b>    | <b>Angle (exp.) (°)</b>  | <b>Angle (calc.) (°)</b>  | <b>Δ (°)</b> |
| N(2)–Cu(1)–N(3) | 118                      | 114                       | 3            |
| N(2)–Cu(1)–N(4) | 83                       | 83                        | 0            |
| N(2)–Cu(1)–N(5) | 123                      | 123                       | 0            |
| N(3)–Cu(1)–N(4) | 123                      | 126                       | 3            |
| N(3)–Cu(1)–N(5) | 83                       | 82                        | 1            |
| N(4)–Cu(1)–N(5) | 133                      | 133                       | 0            |
| Θ               | 88                       | 89                        | 1            |
| β               | 132                      | 129                       | 3            |
| γ               | 145                      | 147                       | 2            |

\*Experimental XRD structural metrics from ref. 2

**Table S3.** Experimental and calculated distances for the Cu(I) cation **4** (**S<sub>0</sub>**). Hydrogen atoms attached to carbons are omitted for clarity (TPSSh-D3/def2-TZVP(-f)/defgrid2)

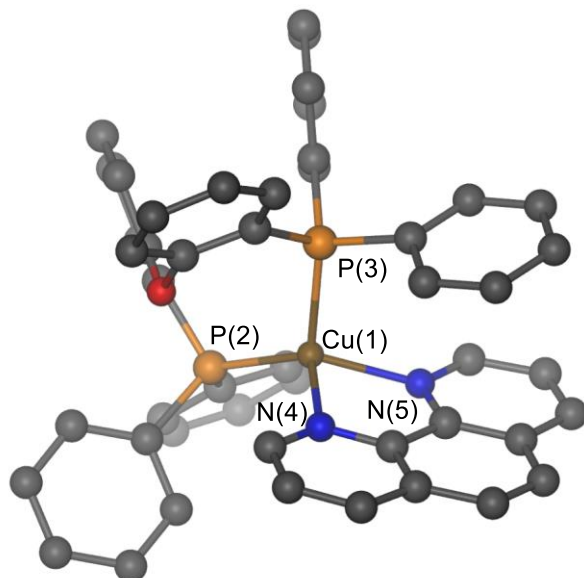

| <b>Bond</b>     | <b>Length (exp.) (Å)</b> | <b>Length (calc.) (Å)</b> | <b> Δ  (Å)</b> |
|-----------------|--------------------------|---------------------------|----------------|
| Cu(1)–P(2)      | 2.195                    | 2.217                     | 0.022          |
| Cu(1)–P(3)      | 2.270                    | 2.278                     | 0.008          |
| Cu(1)–N(5)      | 2.079                    | 2.059                     | 0.020          |
| Cu(1)–N(4)      | 2.054                    | 2.062                     | 0.008          |
| <b>Angle</b>    | <b>Angle (exp.) (°)</b>  | <b>Angle (calc.) (°)</b>  | <b> Δ  (°)</b> |
| P(2)–Cu(1)–P(3) | 118                      | 115                       | 3              |
| P(2)–Cu(1)–N(5) | 123                      | 133                       | 10             |
| P(2)–Cu(1)–N(4) | 124                      | 116                       | 8              |
| N(3)–Cu(1)–N(5) | 101                      | 102                       | 1              |
| N(3)–Cu(1)–N(4) | 103                      | 101                       | 2              |
| N(5)–Cu(1)–N(4) | 82                       | 82                        | 0              |
| Θ               | 89                       | 85                        | 4              |
| B               | 106                      | 105                       | 1              |
| γ               | 137                      | 138                       | 1              |

\*Experimental XRD structural metrics from ref. 3

**Table S4.** Experimental and calculated distances for the Cu(I) cation **5** (**S<sub>0</sub>**). Hydrogen atoms attached to carbons are omitted for clarity (TPSSh-D3/def2-TZVP(-f)/defgrid2)

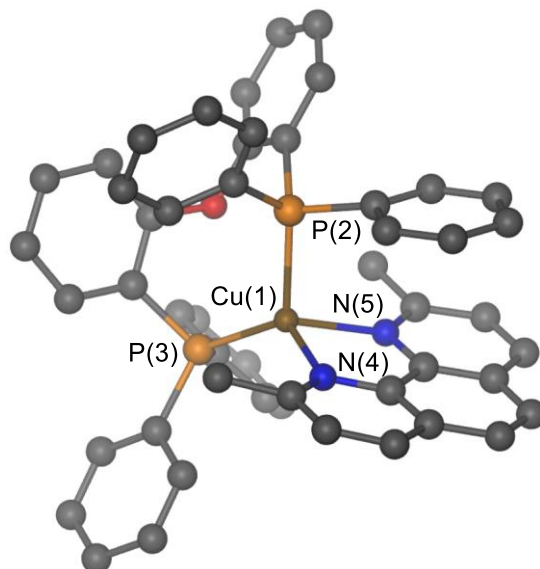

| <b>Bond</b>     | <b>Length (exp.) (Å)</b> | <b>Length (calc.) (Å)</b> | <b> Δ  (Å)</b> |
|-----------------|--------------------------|---------------------------|----------------|
| Cu(1)–P(2)      | 2.315                    | 2.288                     | 0.027          |
| Cu(1)–P(3)      | 2.228                    | 2.227                     | 0.001          |
| Cu(1)–N(4)      | 2.093                    | 2.072                     | 0.021          |
| Cu(1)–N(5)      | 2.087                    | 2.075                     | 0.012          |
| <b>Angle</b>    | <b>Angle (exp.) (°)</b>  | <b>Angle (calc.) (°)</b>  | <b> Δ  (°)</b> |
| P(2)–Cu(1)–P(3) | 118                      | 118                       | 0              |
| P(2)–Cu(1)–N(4) | 104                      | 103                       | 1              |
| P(2)–Cu(1)–N(5) | 100                      | 101                       | 1              |
| N(3)–Cu(1)–N(4) | 123                      | 125                       | 2              |
| N(3)–Cu(1)–N(5) | 123                      | 121                       | 2              |
| N(4)–Cu(1)–N(5) | 81                       | 81                        | 0              |
| Θ               | 88                       | 89                        | 1              |
| B               | 106                      | 106                       | 0              |
| γ               | 136                      | 136                       | 0              |

\*Experimental XRD structural metrics from ref. 4

**Table S5.** Experimental and calculated distances for the Cu(I) cation **7** (**S<sub>0</sub>**). Hydrogen atoms attached to carbons are omitted for clarity (TPSSh-D3/def2-TZVP(-f)/defgrid2)

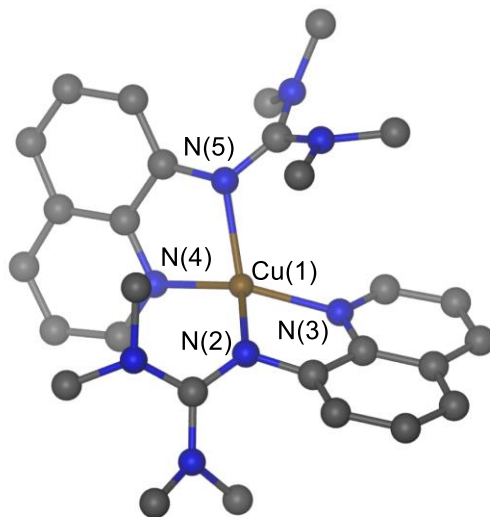

| Bond            | Length (exp.) (Å) | Length (calc.) (Å) | $\Delta$ (Å) |
|-----------------|-------------------|--------------------|--------------|
| Cu(1)–N(2)      | 2.095             | 2.070              | 0.025        |
| Cu(1)–N(3)      | 1.966             | 2.002              | 0.036        |
| Cu(1)–N(4)      | 1.999             | 1.999              | 0.000        |
| Cu(1)–N(5)      | 2.068             | 2.072              | 0.004        |
| Angle           | Angle (exp.) (°)  | Angle (calc.) (°)  | $\Delta$ (°) |
| N(2)–Cu(1)–N(4) | 108               | 117                | 9            |
| N(2)–Cu(1)–N(5) | 129               | 128                | 1            |
| N(2)–Cu(1)–N(3) | 83                | 82                 | 1            |
| N(4)–Cu(1)–N(3) | 149               | 140                | 9            |
| N(4)–Cu(1)–N(5) | 82                | 82                 | 0            |
| N(3)–Cu(1)–N(5) | 114               | 114                | 0            |
| $\Theta$        | 64                | 72                 | 8            |
| $\beta$         | 134               | 133                | 1            |
| $\gamma$        | 140               | 144                | 4            |

\*Experimental XRD structural metrics from ref. 5

## 2. Calculated and experimental ground- and excited-state reduction potentials in MeCN

**Table S6.** Calculated reduction potentials of the investigated Cu(I) complexes in MeCN (V vs. SCE). The experimental ground- and excited-state reduction potentials are reported in parentheses.

| Complex | $E^0_{\text{ox}}$<br>( $D^{\text{ox}} \rightarrow S_0$ ) | $E^0_{\text{red}}$<br>( $S_0 \rightarrow D^{\text{red}}$ ) | ${}^*E^0_{\text{ox}}$<br>( $D^{\text{ox}} \rightarrow T_1$ ) | ${}^*E^0_{\text{red}}$<br>( $T_1 \rightarrow D^{\text{red}}$ ) |
|---------|----------------------------------------------------------|------------------------------------------------------------|--------------------------------------------------------------|----------------------------------------------------------------|
| 2       | 0.66 (0.65 <sup>a</sup> )                                | -1.8 (-1.80 <sup>a</sup> )                                 | -1.1 (-1.05 <sup>e</sup> )                                   | -0.04 (-0.10 <sup>e</sup> )                                    |
| 3       | 0.78 (0.87 <sup>a</sup> )                                | -1.87 (-1.83 <sup>a</sup> )                                | -0.96 (-0.96 <sup>f</sup> )                                  | -0.12 (0.00 <sup>f</sup> )                                     |
| 7       | -0.14 (-0.06 <sup>b</sup> )                              | -2.04                                                      | -1.46                                                        | -0.72                                                          |
| 8       | -0.03 (0.16 <sup>b</sup> )                               | -2.17                                                      | -1.61                                                        | -0.60                                                          |

Experimental reduction potentials were taken from a) ref.<sup>6</sup> and b) ref.<sup>7</sup> Experimental  ${}^*E^0_{\text{ox}}$  and  ${}^*E^0_{\text{red}}$  values were obtained from the corresponding  $E^0_{\text{ox}}$  and  $E^0_{\text{red}}$  values using the following equations  ${}^*E^0_{\text{ox}} = E^0_{\text{ox}} - E_{0,0}$  and  ${}^*E^0_{\text{red}} = E^0_{\text{red}} + E_{0,0}$  where  $E_{0,0}$  was estimated from the maximum emission of the photocatalyst ( $\lambda^{\text{em}}$ ) taken from e) ref.<sup>8</sup> and f) ref.<sup>9</sup>.

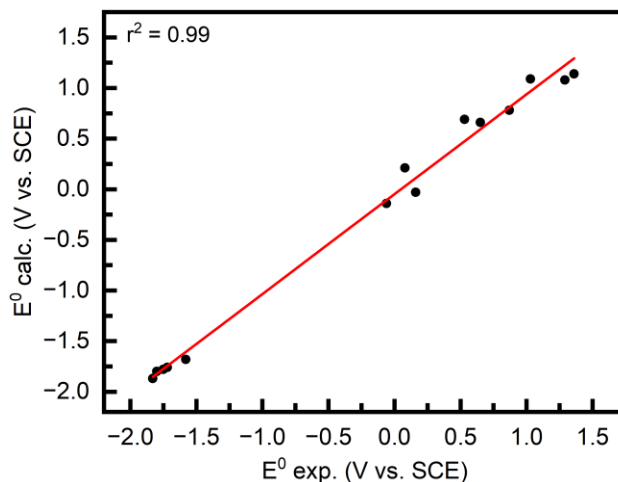

**Figure S1.** Correlation between calculated and experimental ground-state redox potentials  $E^0_{\text{red}}$  and  $E^0_{\text{ox}}$

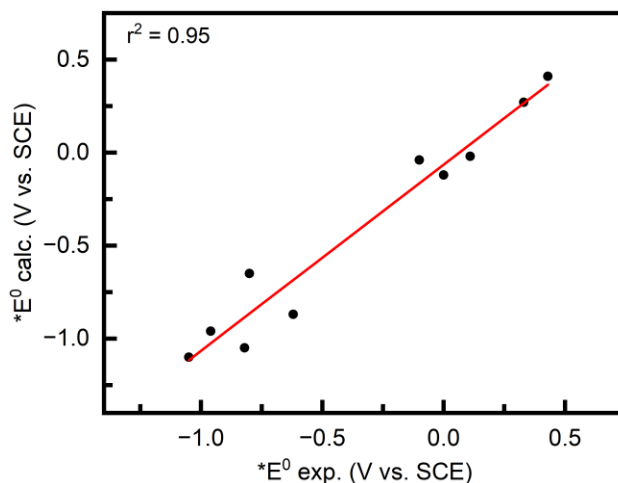

**Figure S2.** Correlation between calculated and experimental excited state reduction potentials  ${}^*E^0_{\text{red}}$  and  ${}^*E^0_{\text{ox}}$

### 3. Condensed spin density populations for $T_1$ , $D^{ox}$ and $D^{red}$ states of complexes 1-9

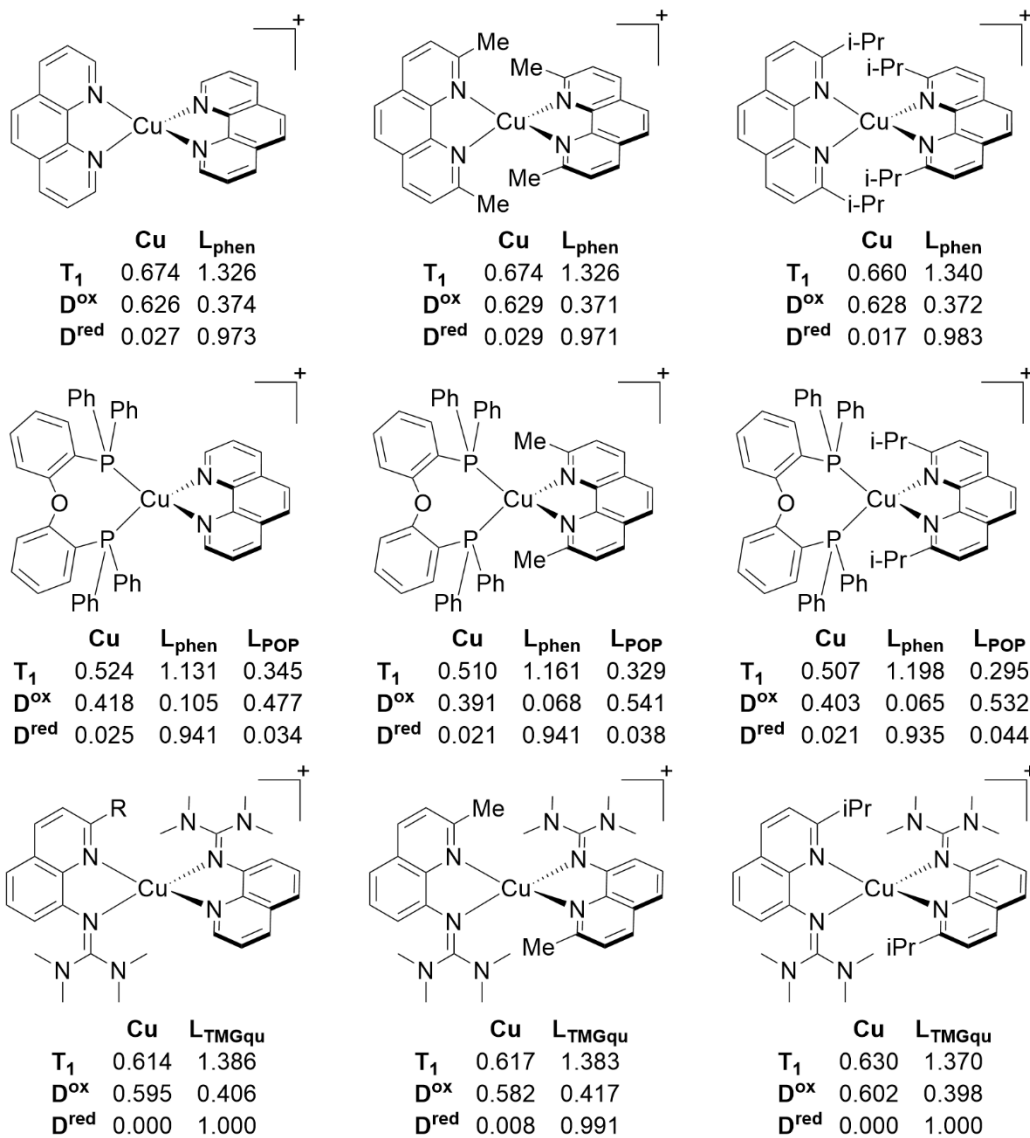

**Figure S3.** Condensed spin density populations at the metal and the ligand(s) in the open-shell  $T_1$ ,  $D^{ox}$ , and  $D^{red}$  states of complexes 1-9



#### 4. Computational protocol for the calculation of reduction potentials

All calculations were carried out using density functional theory (DFT) implemented in Orca software package v.5.0.3.<sup>10,11</sup> Geometry optimizations on the non-truncated models of the complexes were performed using the meta-GGA hybrid functional TPSSh<sup>12</sup> combined with the triple- $\zeta$  valence basis set def2-TZVP(-f)<sup>13</sup> and the auxiliary basis set def2/J<sup>13</sup>. A tight convergence of the wavefunction (energy change, TolE =  $1 \times 10^{-8}$ ; RMS density change, TolRMSP =  $5 \times 10^{-9}$ ; maximum density change, TolMaxP =  $1 \times 10^{-7}$ ; DIIS error convergence, TolErr =  $5 \times 10^{-7}$ ) and a defgrid2 DFT integration grid were requested. The RI-J approximation for the Coulomb integrals and COSX numerical chain-of-sphere integration for the HF exchange integrals (RIJCOSX)<sup>14</sup> was employed to accelerate the DFT calculations. Dispersion effects were considered in all calculations via Grimme's D3 protocol in combination with the Becke-Johnson (D3BJ) damping scheme.<sup>15</sup>

Analytical frequency calculations at the same theoretical level as optimizations (TPSSh-D3/def2-TZVP(-f)) were conducted to confirm that the optimized equilibrium structures represent local minima of the potential energy surface identified by the absence of imaginary vibrational modes, and to obtain the thermodynamic corrections to the electronic energy within the ideal gas-rigid rotor-harmonic oscillator approximation at T = 273.15 K. The electronic energies and wavefunctions of all species computed were refined by subsequent single-point calculations at the TPSSh-D3/def2-TZVP level.

We employed the general procedure described by Baik and Friesner<sup>16</sup> and Roy et al.<sup>17</sup> to calculate standard reduction potentials ( $E^0$ ). Equation 1 shows the defining equation of the half-cell potential  $E^0_{1/2}(A/A^-)$  for a one-electron reduction process ( $A + e^- \rightarrow A^-$ ).  $\Delta G^{0,\text{sol}}$  corresponds to the solution state reaction Gibbs free energy of the reduction process,  $n$  is the number of electrons transferred ( $n = 1$ ), and  $F$  is the Faraday constant ( $F = 96500 \text{ C mol}^{-1}$ ).

$$E^0_{1/2}(A/A^-) = \frac{-\Delta G^{0,\text{sol}}(A/A^-)}{nF} \quad (1)$$

The Born-Haber thermodynamic cycle was used to evaluate  $\Delta G^{0,\text{sol}}(A/A^-)$  of the different reduction processes studied. As shown in equation 2,  $\Delta G^{0,\text{sol}}(A/A^-)$  values are calculated from the Gibbs free energy change of the electron attachment process in the gas phase ( $\Delta G^{0,\text{gas}}(A/A^-)$ ) and the standard solvation free energies of oxidized ( $\Delta G^0_{\text{solv}}(A)$ ) and reduced ( $\Delta G^0_{\text{solv}}(A^-)$ ) species.<sup>16,17</sup>

$$\Delta G^{0,\text{sol}}(A/A^-) = -\Delta G^0_{\text{solv}}(A) + \Delta G^{0,\text{gas}}(A/A^-) + \Delta G^0_{\text{solv}}(A^-) \quad (2)$$

We employed equations 3 and 4 to calculate the value of  $\Delta G^{0,\text{gas}}(A/A^-)$ , where  $E^{\text{gas}}$  is the refined electronic energy from the single point calculations, ZPE is the zero-point energy correction, and  $\Delta G_{0 \rightarrow 298\text{K}}$  is the thermal correction. The latter two values are obtained at 298.15 K from the analytical frequency calculations.

$$G^{0,\text{gas}} = E^{\text{gas}} + \text{ZPE} + \Delta G_{0 \rightarrow 298\text{K}} \quad (3)$$

$$\Delta G^{0,\text{gas}}(A/A^-) = G^{0,\text{gas}}(A^-) - G^{0,\text{gas}}(A) \quad (4)$$

The individual standard solvation-free energies of the oxidized (A) and reduced (A<sup>-</sup>) species ( $\Delta G_{\text{solv}}^0$ ) were obtained by subtracting the solution-state electronic energies ( $E^{\text{sol}}$ ) and the refined electronic energies in the gas phase ( $E^{\text{gas}}$ ), as shown in equation 5. The universal solvation model based on solute electron density (SMD)<sup>18</sup> implemented in Orca 5.0.3 at the same level of theory as the single-point calculations (TPSSH-D3/def2-TZVP) was employed to compute the solution state energies ( $E^{\text{sol}}$ ) of the species. The GEPOL algorithm<sup>19-21</sup> generated the solvent cavity as a solvent-excluded surface, and the atomic radii of the default method were adjusted to H (1.250 Å), C (2.000 Å), N (1.600 Å), O (1.600), P (2.074 Å) and Cu (1.748). The radii of the solvents were set at 2.19 Å and 2.33 for acetonitrile and dichloromethane, respectively.

$$\Delta G_{\text{solv}}^0(\text{A}) = E^{\text{sol}}(\text{A}) - E^{\text{gas}}(\text{A}) \quad (5)$$

The resulting  $\Delta G_{\text{solv}}^0(\text{A/A}^-)$ ,  $\Delta G_{\text{solv}}^0(\text{A})$  and  $\Delta G_{\text{solv}}^0(\text{A}^-)$  values were inserted into equation 2, and the  $E_{1/2}^0(\text{A/A}^-)$  obtained from equation 1. The standard reduction potentials ( $E^0$ ) were then determined from equation 6, where  $E^0(\text{REF})$  is the reference electrode, which is the standard calomel electrode (SCE) in our manuscript. The absolute half-cell potential of the SCE electrode is 4.429 V.<sup>22</sup>

$$E^0 = E^0(\text{A/A}^-) - E^0(\text{REF}) \quad (6)$$

The above protocol was initially developed to calculate ground-state reduction potentials (i.e.,  $E_{\text{ox}}^0$  and  $E_{\text{red}}^0$ ).<sup>16,17</sup> Our recent reports show that the same robust framework can be employed to calculate excited-state reduction potentials (i.e.,  ${}^*E_{\text{ox}}^0$  and  ${}^*E_{\text{red}}^0$ ) of Ru, Ir, and Cu complexes typically within 0.15 V to experimental data when a <sup>3</sup>MLCT state defines the excited state redox properties.<sup>23-26</sup> Therefore, we employed the same method described above (i.e., equations 1-6) to directly compute the solution state reaction Gibbs free energies of excited-state electron transfers ( $\Delta G_{\text{solv}}^0(\text{T}_1/\text{D}^{\text{red}})$  and  $\Delta G_{\text{solv}}^0(\text{D}^{\text{ox}}/\text{T}_1)$ ).<sup>22,27,28</sup> For this, we directly access the gas phase and solution state energetics of the <sup>3</sup>MLCT state and use those values to compute  $\Delta G_{\text{solv}}^0$  of the redox process of interest and excited state reduction potentials (equations 1-6). This approach fundamentally differs from other reported protocols for calculating excited state reduction potentials, which are based on computing  $E_{0,0}$  values using TD-DFT methodologies.<sup>22,27,28</sup>

Here, we provide a step-by-step tutorial for the protocol we used for the calculation of reduction potentials using the ground state  $\mathbf{D}^{\text{ox}} \rightarrow \mathbf{S}_0$  redox step ( $E_{\text{ox}}^0$ ) of  $[\text{Cu}(\text{dmp})_2]^+$  (**2**) in DCM as an example. The same protocol can be used for the other redox events by changing the XYZ coordinates, charge, and multiplicity appropriately.

The optimized structures for the  $\mathbf{D}^{\text{ox}}$  and  $\mathbf{S}_0$  species were obtained through *geometry optimizations* using the following input files in Orca 5.0.3 (In all examples provided herein, the lines for controlling the RAM allocation (%maxcore) and processors (%pal) are omitted for simplicity). The initial geometries were either taken from experimental X-ray structures or built *in silico*.

Input file for the  $\mathbf{S}_0$  state:

```
!TPSSH def2-TZVP(-f) Opt d3 TightSCF SlowConv RIJCOSX defgrid2

* xyz 1 1
Cu      3.775315      8.721786      1.035774
N       3.902955      6.703423      1.142789
N       5.763053      8.606687      1.414008
```

```

N      2.936746      9.717854     -0.513148
N      2.510285      9.872399      2.123970
C      2.943197      5.787994      0.994628
C      3.230632      4.413738      1.095037
H      2.429145      3.697455      0.966424
.
.
.
H      3.328423      8.059850      3.769686
H      2.740440      8.844015      5.262242
H      4.177491      9.456630      4.430406
*

```

Input file for the  $D^{ox}$  state:

```

!TPSSH def2-TZVP(-f) Opt d3 TightSCF SlowConv RIJCOSX defgrid2

* xyz 2 2
Cu      3.633165      8.552478      0.905332
N      3.975450      6.556050      1.012719
N      5.634046      8.623082      1.431591
N      2.728021      9.605868     -0.591076
N      2.527604      9.824432      2.077359
C      3.148232      5.547657      0.753119
C      3.553039      4.207349      0.903336
H      2.951693      3.503445      0.689189
.
.
.
H      2.616440      7.953999      4.016880
H      2.991785      9.011461      5.158753
H      4.016815      8.727543      3.963297
*

```

As a result of the previous calculations, a file with the extension .xyz containing the XYZ coordinates for the optimized equilibrium structures is generated. Those XYZ coordinates are used to perform the next set of calculations. Besides, the gas phase dispersion corrected electronic energy at the TPSSH-D3/def2-TZVP(-f) level ( $E^{\text{gas}}$ ) was obtained from the .out files. *Frequency calculations* were performed at the same level of theory as optimizations using the subsequent input files (The lines for controlling the RAM allocation (%maxcore) and processors (%pal) are omitted for simplicity).  $G^{\text{0,gas}}$  values are obtained from the .out file of these calculations.

Input file for the  $S_0$  state:

```

!TPSSH def2-TZVP(-f) freq d3 TightSCF SlowConv RIJCOSX defgrid2

* xyz 1 1
Cu      3.78618454890123      8.73585660105153      1.04731521051368
N      3.90208830350401      6.71293562409774      1.14666985784901
N      5.77051366583172      8.60757917889728      1.42773688549201
N      2.93747318909698      9.71983662178366     -0.50551149761289
N      2.51820235163825      9.88479643309250      2.13183007265793
C      2.93897002448102      5.80234039852265      0.99266436014885
C      3.22163291603248      4.42617167281352      1.08106976936983
H      2.41753091721533      3.71387792414380      0.94693449633693
.

```

```

.
.
H 3.31486723296830 8.06978047771496 3.81341544613296
H 2.80887077200594 8.92504045306826 5.29405513411201
H 4.21854137172579 9.47235397735990 4.37493688551659
*

```

Input file for the  $D^{0x}$  state:

```
!TPSSh def2-TZVP(-f) freq d3 TightSCF SlowConv RIJCOSX defgrid2
```

```

* xyz 2 2
Cu 3.81080208108758 8.75271149460812 1.02539382047211
N 3.94009921789056 6.75620521048136 0.88367367431585
N 5.68679183273613 8.61262607642444 1.70013139646962
N 2.77362342342012 9.49762691641693 -0.51167644551542
N 2.76085499924761 10.08280511105058 2.10043302301560
C 3.00597114509435 5.87113254008780 0.52522630254695
C 3.29183008917623 4.49036411089094 0.55316206040174
.
.
.
H 4.02519646125763 8.59920785297405 3.79768892839755
H 3.18960114949372 9.24054981033882 5.22458972696069
H 4.56237356601734 10.10983624215874 4.55228276923024
*

```

Single-point calculations were computed at the TPSSh-D3/def2-TZVP level of theory to refine the gas phase electronic energy ( $E^{\text{gas}}$ ) and to obtain solution state energies ( $E^{\text{sol}}$ ).

The refinement of  $E^{\text{gas}}$  values was carried out using the following input files.

Input file for the  $S_0$  state:

```
!TPSSh def2-TZVP d3 TightSCF SlowConv RIJCOSX defgrid2
```

```

* xyz 1 1
Cu 3.78618454890123 8.73585660105153 1.04731521051368
N 3.90208830350401 6.71293562409774 1.14666985784901
N 5.77051366583172 8.60757917889728 1.42773688549201
N 2.93747318909698 9.71983662178366 -0.50551149761289
N 2.51820235163825 9.88479643309250 2.13183007265793
C 2.93897002448102 5.80234039852265 0.99266436014885
C 3.22163291603248 4.42617167281352 1.08106976936983
H 2.41753091721533 3.71387792414380 0.94693449633693
.
.
.
H 3.31486723296830 8.06978047771496 3.81341544613296
H 2.80887077200594 8.92504045306826 5.29405513411201
H 4.21854137172579 9.47235397735990 4.37493688551659
*

```

Input file for the  $D^{0x}$  state:

```
!TPSSh def2-TZVP d3 TightSCF SlowConv RIJCOSX defgrid2

* xyz 2 2
Cu 3.81080208108758 8.75271149460812 1.02539382047211
N 3.94009921789056 6.75620521048136 0.88367367431585
N 5.68679183273613 8.61262607642444 1.70013139646962
N 2.77362342342012 9.49762691641693 -0.51167644551542
N 2.76085499924761 10.08280511105058 2.10043302301560
C 3.00597114509435 5.87113254008780 0.52522630254695
C 3.29183008917623 4.49036411089094 0.55316206040174
.
.
.
H 4.02519646125763 8.59920785297405 3.79768892839755
H 3.18960114949372 9.24054981033882 5.22458972696069
H 4.56237356601734 10.10983624215874 4.55228276923024
*
```

The following input files were employed to obtain solution state energies ( $E^{\text{sol}}$ )

Input file for the  $S_0$  state:

```
!TPSSh def2-TZVP d3 TightSCF SlowConv RIJCOSX defgrid2

!CPCM
%cpcm smd true
SMDsolvent "DICHLOROMETHANE"
surfacetype gepol_ses
rsolv 2.33
radius[1] 1.250
radius[6] 2.000
radius[7] 1.600
radius[29] 1.748
end

* xyz 1 1
Cu 3.78618454890123 8.73585660105153 1.04731521051368
N 3.90208830350401 6.71293562409774 1.14666985784901
N 5.77051366583172 8.60757917889728 1.42773688549201
N 2.93747318909698 9.71983662178366 -0.50551149761289
N 2.51820235163825 9.88479643309250 2.13183007265793
C 2.93897002448102 5.80234039852265 0.99266436014885
C 3.22163291603248 4.42617167281352 1.08106976936983
H 2.41753091721533 3.71387792414380 0.94693449633693
.
.
.
H 3.31486723296830 8.06978047771496 3.81341544613296
H 2.80887077200594 8.92504045306826 5.29405513411201
H 4.21854137172579 9.47235397735990 4.37493688551659
*
```

Input file for the  $D^{0x}$  state:

```
!TPSSh def2-TZVP d3 TightSCF SlowConv RIJCOSX defgrid2
```

```

!CPCM
%cpcm smd true
SMDsolvent "DICHLOROMETHANE"
surfacetype gepol_ses
rsolv 2.33
radius[1] 1.250
radius[6] 2.000
radius[7] 1.600
radius[29] 1.748
end

* xyz 2 2
Cu 3.81080208108758 8.75271149460812 1.02539382047211
N 3.94009921789056 6.75620521048136 0.88367367431585
N 5.68679183273613 8.61262607642444 1.70013139646962
N 2.77362342342012 9.49762691641693 -0.51167644551542
N 2.76085499924761 10.08280511105058 2.10043302301560
C 3.00597114509435 5.87113254008780 0.52522630254695
C 3.29183008917623 4.49036411089094 0.55316206040174
.
.
.
H 4.02519646125763 8.59920785297405 3.79768892839755
H 3.18960114949372 9.24054981033882 5.22458972696069
H 4.56237356601734 10.10983624215874 4.55228276923024
*

```

Table S7 collects all the data that was extracted from the corresponding output files of the previous calculations for  $S_0$ ,  $T_1$ ,  $D^{ox}$ , and  $D^{red}$  states of complexes **1-9**

**Table S7.** DFT calculated energies of the  $S_0$ ,  $T_1$ ,  $D^{ox}$ , and  $D^{red}$  states of complexes **1-9**. Values are reported in kcal/mol

| Complex | State     | $E^{gas}$                  | $G^{0,gas}$                | $E^{gas}$              | $E^{sol} - DCM$        |
|---------|-----------|----------------------------|----------------------------|------------------------|------------------------|
|         |           | TPSSh-D3/<br>def2-TZVP(-f) | TPSSh-D3/<br>def2-TZVP(-f) | TPSSh-D3/<br>def2-TZVP | TPSSh-D3/<br>def2-TZVP |
| 1       | $S_0$     | -1747124.69                | -1746939.01                | -1747144.01            | -1747189.47            |
|         | $T_1$     | -1747092.46                | -1746907.12                | -1747112.35            | -1747158.72            |
|         | $D^{ox}$  | -1746919.55                | -1746731.98                | -1746939.34            | -1747073.26            |
|         | $D^{red}$ | -1747212.23                | -1747030.71                | -1747231.71            | -1747250.57            |
| 2       | $S_0$     | -1845879.60                | -1845630.58                | -1845900.56            | -1845946.38            |
|         | $T_1$     | -1845838.47                | -1845589.44                | -1845859.92            | -1845905.45            |
|         | $D^{ox}$  | -1845672.98                | -1845422.10                | -1845694.29            | -1845822.55            |
|         | $D^{red}$ | -1845965.16                | -1845719.78                | -1845986.30            | -1846005.67            |
| 3       | $S_0$     | -2883912.94                | -2883413.17                | -2883950.70            | -2884000.70            |
|         | $T_1$     | -2883857.30                | -2883359.80                | -2883895.52            | -2883945.57            |
|         | $D^{ox}$  | -2883713.37                | -2883213.50                | -2883751.26            | -2883869.35            |
|         | $D^{red}$ | -2883990.80                | -2883494.68                | -2884028.89            | -2884057.72            |
| 4       | $S_0$     | -2735806.50                | -2735409.32                | -2735842.14            | -2735893.19            |
|         | $T_1$     | -2735759.48                | -2735363.93                | -2735795.53            | -2735846.65            |

|   |                        |             |             |             |             |
|---|------------------------|-------------|-------------|-------------|-------------|
|   | <b>D<sup>ox</sup></b>  | -2735610.19 | -2735212.23 | -2735645.98 | -2735766.98 |
|   | <b>D<sup>red</sup></b> | -2735888.42 | -2735494.61 | -2735924.35 | -2735953.29 |
| 5 | <b>S<sub>0</sub></b>   | -2785182.58 | -2784752.16 | -2785219.03 | -2785269.96 |
|   | <b>T<sub>1</sub></b>   | -2785129.66 | -2784701.12 | -2785166.44 | -2785217.51 |
|   | <b>D<sup>ox</sup></b>  | -2784985.75 | -2784554.86 | -2785022.34 | -2785142.04 |
|   | <b>D<sup>red</sup></b> | -2785261.82 | -2784834.93 | -2785298.57 | -2785327.55 |
| 6 | <b>S<sub>0</sub></b>   | -2043344.39 | -2042958.87 | -2043368.00 | -2043413.27 |
|   | <b>T<sub>1</sub></b>   | -2043300.21 | -2042916.72 | -2043325.87 | -2043371.05 |
|   | <b>D<sup>ox</sup></b>  | -2043141.53 | -2042754.02 | -2043165.47 | -2043287.88 |
|   | <b>D<sup>red</sup></b> | -2043428.04 | -2043045.30 | -2043451.84 | -2043471.98 |
| 7 | <b>S<sub>0</sub></b>   | -1987862.74 | -1987520.20 | -1987888.12 | -1987933.72 |
|   | <b>T<sub>1</sub></b>   | -1987828.59 | -1987486.26 | -1987854.64 | -1987902.67 |
|   | <b>D<sup>ox</sup></b>  | -1987678.92 | -1987333.38 | -1987704.72 | -1987829.82 |
|   | <b>D<sup>red</sup></b> | -1987940.52 | -1987602.16 | -1987965.99 | -1987986.74 |
| 8 | <b>S<sub>0</sub></b>   | -2037239.93 | -2036865.27 | -2037266.12 | -2037310.57 |
|   | <b>T<sub>1</sub></b>   | -2037200.31 | -2036825.96 | -2037227.06 | -2037273.58 |
|   | <b>D<sup>ox</sup></b>  | -2037054.62 | -2036677.10 | -2037081.13 | -2037204.41 |
|   | <b>D<sup>red</sup></b> | -2037315.44 | -2036944.35 | -2037341.69 | -2037361.24 |
| 9 | <b>S<sub>0</sub></b>   | -2135961.72 | -2135517.43 | -2135989.21 | -2136033.88 |
|   | <b>T<sub>1</sub></b>   | -2135920.04 | -2135476.84 | -2135948.08 | -2135993.94 |
|   | <b>D<sup>ox</sup></b>  | -2135776.79 | -2135330.24 | -2135804.57 | -2135925.49 |
|   | <b>D<sup>red</sup></b> | -2136035.29 | -2135595.27 | -2136062.90 | -2136083.86 |

The solutions state reaction Gibbs free energies and reduction potentials of the different electron transfer events of the photoredox cycle  $\mathbf{D}^{\text{ox}} \rightarrow \mathbf{S}_0$  ( $E^0_{\text{ox}}$ ),  $\mathbf{S}_0 \rightarrow \mathbf{D}^{\text{red}}$  ( $E^0_{\text{red}}$ ),  $\mathbf{D}^{\text{ox}} \rightarrow \mathbf{T}_1$  ( $^*E^0_{\text{ox}}$ ), and  $\mathbf{T}_1 \rightarrow \mathbf{D}^{\text{red}}$  ( $^*E^0_{\text{red}}$ ) can be calculated from the values reported in Table S7 using equations 1-6. For consistency, the calculations are always performed in the direction of reduction (i.e.,  $\mathbf{D}^{\text{ox}} \rightarrow \mathbf{T}_1$ ), even though ligand-centered redox processes of the cycle take place in the direction of oxidation. The results of the calculations are provided in Table S8.

Since generally single point calculations are performed with more sophisticated levels of theory than optimizations and frequency calculations (in our case, we only refined the basis set), a correction to  $G^{0,\text{gas}}$  needs to be computed for each species to account for the differences in the levels of theory of  $G^{0,\text{gas}}$  and  $E^{\text{gas}}$ ,  $E^{\text{sol}}$  values obtained from single point calculations. The corrected  $G^{0,\text{gas}}$  can be calculated using equations 7 and 8.  $G^{0,\text{gas}}_{\text{LT1}}$  and  $E^{\text{gas}}_{\text{LT1}}$  correspond to the gas phase electronic energy and Gibbs free energy at the TPSSh-D3/def2-TZVP(-f) level, respectively.  $G^{0,\text{gas}}_{\text{LT2}}$  is the corrected gas phase Gibbs free energy at the TPSSh-D3/def2-TZVP level of theory, and  $G_{\text{corr}}$  is the correction factor.

$$G^{0,\text{gas}}_{\text{LT2}} = G^{0,\text{gas}}_{\text{LT1}} + G_{\text{corr}} \quad (7)$$

$$G_{\text{corr}} = G^{0,\text{gas}}_{\text{LT1}} - E^{\text{gas}}_{\text{LT1}} \quad (8)$$

**Table S8.** Calculated values for the application of the Born Haber cycle for computing reduction potentials of the redox events of the photoredox cycle of complexes **1-9**.  $E^0$  values are computed in DCM and referenced to the standard calomel electrode (SCE)

| Complex  | Redox event                                                               | $\Delta G^{0,\text{gas}}(\text{A/A}^-)$<br>(kcal/mol) | $\Delta G^{0,\text{solv}}(\text{A})$<br>(kcal/mol) | $\Delta G^{0,\text{solv}}(\text{A}^-)$<br>(kcal/mol) | $\Delta G^{0,\text{sol}}(\text{A/A}^-)$<br>(kcal/mol) | $E^{0}_{1/2}(\text{A/A}^-)$<br>(V) | $E^0$<br>(V) |
|----------|---------------------------------------------------------------------------|-------------------------------------------------------|----------------------------------------------------|------------------------------------------------------|-------------------------------------------------------|------------------------------------|--------------|
| <b>1</b> | $\text{D}^{\text{ox}} \rightarrow \text{S}_0$<br>( $E^0_{\text{ox}}$ )    | -206.56                                               | -133.92                                            | -45.46                                               | -118.10                                               | 5.12                               | 0.69         |
|          | $\text{S}_0 \rightarrow \text{D}^{\text{red}}$<br>( $E^0_{\text{red}}$ )  | -91.86                                                | -45.46                                             | -18.86                                               | -65.26                                                | 2.83                               | -1.60        |
|          | $\text{D}^{\text{ox}} \rightarrow \text{T}_1$<br>(* $E^0_{\text{ox}}$ )   | -175.24                                               | -133.92                                            | -46.37                                               | -87.69                                                | 3.80                               | -0.63        |
|          | $\text{T}_1 \rightarrow \text{D}^{\text{red}}$<br>(* $E^0_{\text{red}}$ ) | -123.18                                               | -46.37                                             | -18.86                                               | -95.67                                                | 4.15                               | -0.28        |
| <b>2</b> | $\text{D}^{\text{ox}} \rightarrow \text{S}_0$<br>( $E^0_{\text{ox}}$ )    | -208.13                                               | -128.26                                            | -45.82                                               | -125.69                                               | 5.45                               | 1.02         |
|          | $\text{S}_0 \rightarrow \text{D}^{\text{red}}$<br>( $E^0_{\text{red}}$ )  | -89.38                                                | -45.82                                             | -19.37                                               | -62.93                                                | 2.73                               | -1.70        |
|          | $\text{D}^{\text{ox}} \rightarrow \text{T}_1$<br>(* $E^0_{\text{ox}}$ )   | -167.48                                               | -128.26                                            | -45.53                                               | -84.75                                                | 3.68                               | -0.75        |
|          | $\text{T}_1 \rightarrow \text{D}^{\text{red}}$<br>(* $E^0_{\text{red}}$ ) | -130.03                                               | -45.53                                             | -19.37                                               | -103.87                                               | 4.50                               | 0.08         |
| <b>3</b> | $\text{D}^{\text{ox}} \rightarrow \text{S}_0$<br>( $E^0_{\text{ox}}$ )    | -204.52                                               | -122.41                                            | -45.27                                               | -127.38                                               | 5.52                               | 1.09         |
|          | $\text{S}_0 \rightarrow \text{D}^{\text{red}}$<br>( $E^0_{\text{red}}$ )  | -86.62                                                | -45.27                                             | -20.14                                               | -61.49                                                | 2.67                               | -1.76        |
|          | $\text{D}^{\text{ox}} \rightarrow \text{T}_1$<br>(* $E^0_{\text{ox}}$ )   | -164.42                                               | -122.41                                            | -45.18                                               | -87.19                                                | 3.78                               | -0.65        |
|          | $\text{T}_1 \rightarrow \text{D}^{\text{red}}$<br>(* $E^0_{\text{red}}$ ) | -126.72                                               | -45.18                                             | -20.14                                               | -101.68                                               | 4.41                               | -0.02        |
| <b>4</b> | $\text{D}^{\text{ox}} \rightarrow \text{S}_0$<br>( $E^0_{\text{ox}}$ )    | -196.94                                               | -121.00                                            | -51.05                                               | -126.99                                               | 5.51                               | 1.08         |
|          | $\text{S}_0 \rightarrow \text{D}^{\text{red}}$<br>( $E^0_{\text{red}}$ )  | -85.58                                                | -51.05                                             | -28.94                                               | -63.47                                                | 2.75                               | -1.68        |
|          | $\text{D}^{\text{ox}} \rightarrow \text{T}_1$<br>(* $E^0_{\text{ox}}$ )   | -151.96                                               | -121.00                                            | -51.12                                               | -82.08                                                | 3.56                               | -0.87        |
|          | $\text{T}_1 \rightarrow \text{D}^{\text{red}}$<br>(* $E^0_{\text{red}}$ ) | -130.56                                               | -51.12                                             | -28.94                                               | -108.38                                               | 4.70                               | 0.27         |
| <b>5</b> | $\text{D}^{\text{ox}} \rightarrow \text{S}_0$<br>( $E^0_{\text{ox}}$ )    | -197.16                                               | -119.70                                            | -50.93                                               | -128.39                                               | 5.57                               | 1.14         |
|          | $\text{S}_0 \rightarrow \text{D}^{\text{red}}$<br>( $E^0_{\text{red}}$ )  | -83.07                                                | -50.93                                             | -28.98                                               | -61.12                                                | 2.65                               | -1.78        |
|          | $\text{D}^{\text{ox}} \rightarrow \text{T}_1$<br>(* $E^0_{\text{ox}}$ )   | -146.45                                               | -119.70                                            | -51.07                                               | -77.82                                                | 3.37                               | -1.05        |
|          | $\text{T}_1 \rightarrow \text{D}^{\text{red}}$<br>(* $E^0_{\text{red}}$ ) | -133.78                                               | -51.07                                             | -28.98                                               | -111.69                                               | 4.84                               | 0.41         |
| <b>6</b> | $\text{D}^{\text{ox}} \rightarrow \text{S}_0$<br>( $E^0_{\text{ox}}$ )    | -199.54                                               | -118.09                                            | -50.00                                               | -131.45                                               | 5.70                               | 1.27         |
|          | $\text{S}_0 \rightarrow \text{D}^{\text{red}}$<br>( $E^0_{\text{red}}$ )  | -81.84                                                | -50.00                                             | -28.83                                               | -60.67                                                | 2.63                               | -1.80        |
|          | $\text{D}^{\text{ox}} \rightarrow \text{T}_1$<br>(* $E^0_{\text{ox}}$ )   | -146.63                                               | -118.09                                            | -50.05                                               | -78.59                                                | 3.41                               | -1.02        |
|          | $\text{T}_1 \rightarrow \text{D}^{\text{red}}$<br>(* $E^0_{\text{red}}$ ) | -134.75                                               | -50.05                                             | -28.83                                               | -113.53                                               | 4.92                               | 0.49         |



|   |                                               |         |         |        |         |      |       |
|---|-----------------------------------------------|---------|---------|--------|---------|------|-------|
| 7 | $D^{ox} \rightarrow S_0$<br>( $E_{ox}^0$ )    | -186.40 | -125.10 | -45.60 | -106.90 | 4.64 | 0.21  |
|   | $S_0 \rightarrow D^{red}$<br>( $E_{red}^0$ )  | -82.05  | -45.60  | -20.75 | -57.20  | 2.48 | -1.95 |
|   | $D^{ox} \rightarrow T_1$<br>(* $E_{ox}^0$ )   | -153.13 | -125.10 | -48.03 | -76.06  | 3.30 | -1.13 |
|   | $T_1 \rightarrow D^{red}$<br>(* $E_{red}^0$ ) | -115.32 | -48.03  | -20.75 | -88.04  | 3.82 | -0.61 |
| 8 | $D^{ox} \rightarrow S_0$<br>( $E_{ox}^0$ )    | -187.85 | -123.28 | -44.45 | -109.02 | 4.73 | 0.30  |
|   | $S_0 \rightarrow D^{red}$<br>( $E_{red}^0$ )  | -79.14  | -44.45  | -19.55 | -54.24  | 2.35 | -2.08 |
|   | $D^{ox} \rightarrow T_1$<br>(* $E_{ox}^0$ )   | -149.10 | -123.28 | -46.52 | -72.34  | 3.14 | -1.29 |
|   | $T_1 \rightarrow D^{red}$<br>(* $E_{red}^0$ ) | -117.89 | -46.52  | -19.55 | -90.92  | 3.94 | -0.49 |
| 9 | $D^{ox} \rightarrow S_0$<br>( $E_{ox}^0$ )    | -186.90 | -120.92 | -44.67 | -110.65 | 4.80 | 0.37  |
|   | $S_0 \rightarrow D^{red}$<br>( $E_{red}^0$ )  | -77.96  | -44.67  | -20.96 | -54.25  | 2.35 | -2.08 |
|   | $D^{ox} \rightarrow T_1$<br>(* $E_{ox}^0$ )   | -146.86 | -120.92 | -45.86 | -71.80  | 3.11 | -1.32 |
|   | $T_1 \rightarrow D^{red}$<br>(* $E_{red}^0$ ) | -118.00 | -45.86  | -20.96 | -93.10  | 4.04 | -0.39 |

The same procedure was followed to calculate the reduction potentials of complexes **2**, **3**, **7**, and **8** in MeCN for validation purposes (see Table S6).

## 5. Homodesmotic reactions

Homodesmotic reactions in DCM were employed, using complex **1** as a reference, to quantify the stabilization/destabilization effect of the substitution of H for  $-\text{CH}_3$  or  $-\text{i-Pr}$  in the 2,9 positions of the phenanthroline redox-active ligand in both  $\text{S}_0$  and  $\text{D}^{\text{ox}}$  states of complexes **1-3**. As shown in Scheme S1, to calculate the homodesmotic stabilization energies (HSE) of complex **2** and **3** vs. **1**, the solution state energies of  $\text{S}_0$  and  $\text{D}^{\text{ox}}$  states (see Table S7), as well as the energies of the free ligands, are required. Optimization, frequencies, and single-point calculations to obtain the solution state electronic energy of the free ligands were carried out at the TPSSh-D3/def2-TZVP level of theory.

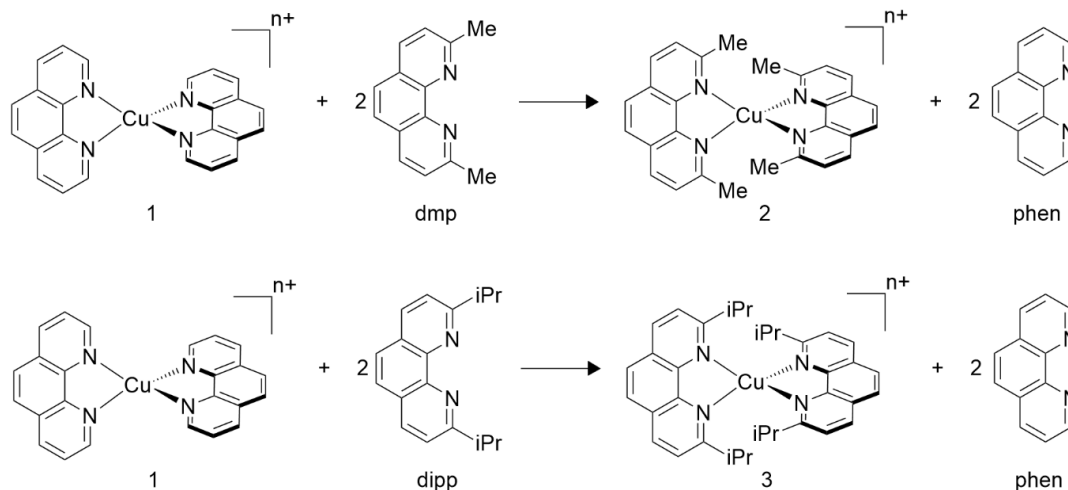

**Scheme S1.** Homodesmotic reactions to evaluate the homodesmotic stabilization energies (HSE) for the substitution of H for  $-\text{CH}_3$  or  $-\text{i-Pr}$  in the 2,9 positions of the phenanthroline redox-active ligand in both  $\text{S}_0$  ( $n=1$ ) and  $\text{D}^{\text{ox}}$  ( $n=2$ ) states of complexes **1-3**.

Table S9 compiles the solution state electronic energy of the complexes and the free ligands used for the calculation of homodesmotic reactions.

**Table S9.** DFT calculated solution state electronic energies in DCM of the  $\text{S}_0$  and  $\text{D}^{\text{ox}}$  states of complexes **1-3** together with the  $E^{\text{sol}}$  values of the free ligands. Values are reported in kcal/mol

| Complex                                            | State                  | $E^{\text{sol}}$ |
|----------------------------------------------------|------------------------|------------------|
| [Cu(phen) <sub>2</sub> ] <sup>+</sup> ( <b>1</b> ) | $\text{S}_0$           | -1747189.47      |
|                                                    | $\text{D}^{\text{ox}}$ | -1747073.26      |
| [Cu(dmp) <sub>2</sub> ] <sup>+</sup> ( <b>2</b> )  | $\text{S}_0$           | -1845946.38      |
|                                                    | $\text{D}^{\text{ox}}$ | -1845822.55      |
| [Cu(dipp) <sub>2</sub> ] <sup>+</sup> ( <b>3</b> ) | $\text{S}_0$           | -2043413.27      |
|                                                    | $\text{D}^{\text{ox}}$ | -2043287.88      |
| phen                                               | –                      | -358876.80       |
| dmp                                                | –                      | -408250.70       |
| dipp                                               | –                      | -506982.02       |

The resulting HSE values are provided in Table S10.

**Table S10.** Calculated homodesmotic stabilization energies (HSE) in DCM

| [Cu(phen) <sub>2</sub> ] <sup>n+</sup> + 2 dmp → [Cu(dmp) <sub>2</sub> ] <sup>n+</sup> + 2 phen:   |                |          |
|----------------------------------------------------------------------------------------------------|----------------|----------|
| State                                                                                              | HSE (kcal/mol) | HSE (eV) |
| <b>D<sup>ox</sup> (n = 2)</b>                                                                      | -1.50          | -0.07    |
| <b>S<sub>0</sub> (n = 1)</b>                                                                       | -9.13          | -0.40    |
| [Cu(phen) <sub>2</sub> ] <sup>n+</sup> + 2 dipp → [Cu(dipp) <sub>2</sub> ] <sup>n+</sup> + 2 phen: |                |          |
| State                                                                                              | HSE (kcal/mol) | HSE (eV) |
| <b>D<sup>ox</sup> (n = 2)</b>                                                                      | -4.19          | -0.18    |
| <b>S<sub>0</sub> (n = 1)</b>                                                                       | -13.37         | -0.58    |

Figure S4 provides a depiction of the relative stability of the **S<sub>0</sub>** and **D<sup>ox</sup>** states of complexes **1-3** in DCM based on the HSE values, showcasing the overall effect of substituting H for -CH<sub>3</sub> or -i-Pr on the thermodynamic driving force of the reduction processes.

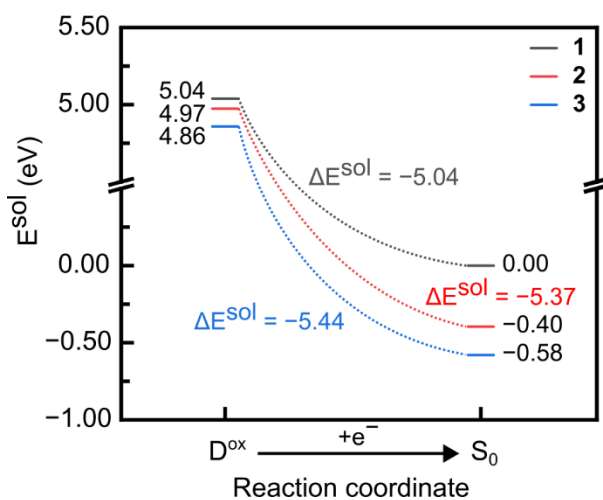

**Figure S4.** Effect of substituting H for -CH<sub>3</sub> and -i-Pr on the thermodynamic driving force of the ground state metal centered **D<sup>ox</sup>** → **S<sub>0</sub>** redox process of complexes **1-3**

## 6. Calculated structural metrics

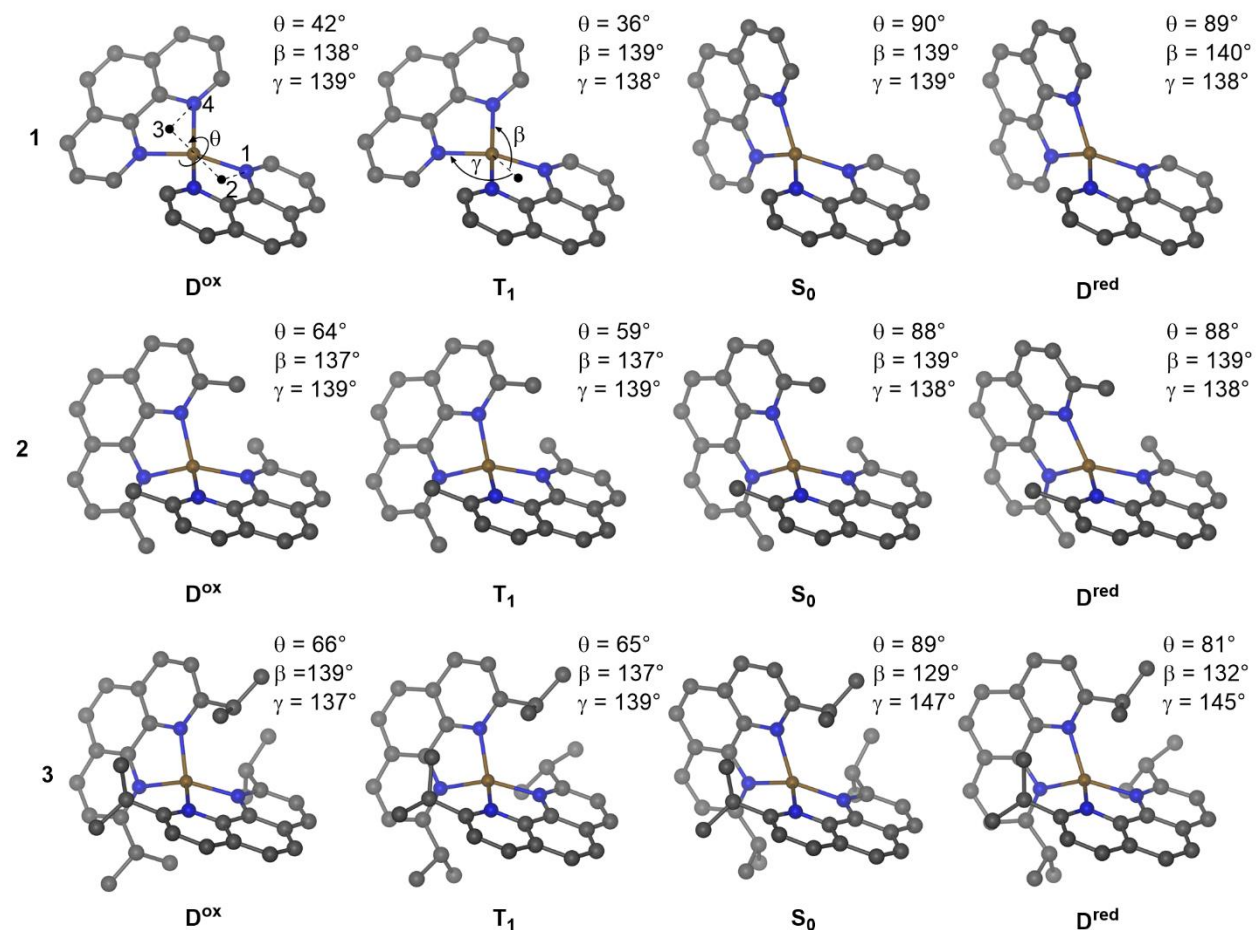

**Figure S5.** Computed equilibrium structures at the  $S_0$ ,  $T_1$ ,  $D^{ox}$ , and  $D^{red}$  states of complexes **1**, **2**, and **3**. The angles  $\theta$ ,  $\beta$ , and  $\gamma$  (°) that characterize the first coordination sphere of the metal complexes are provided.

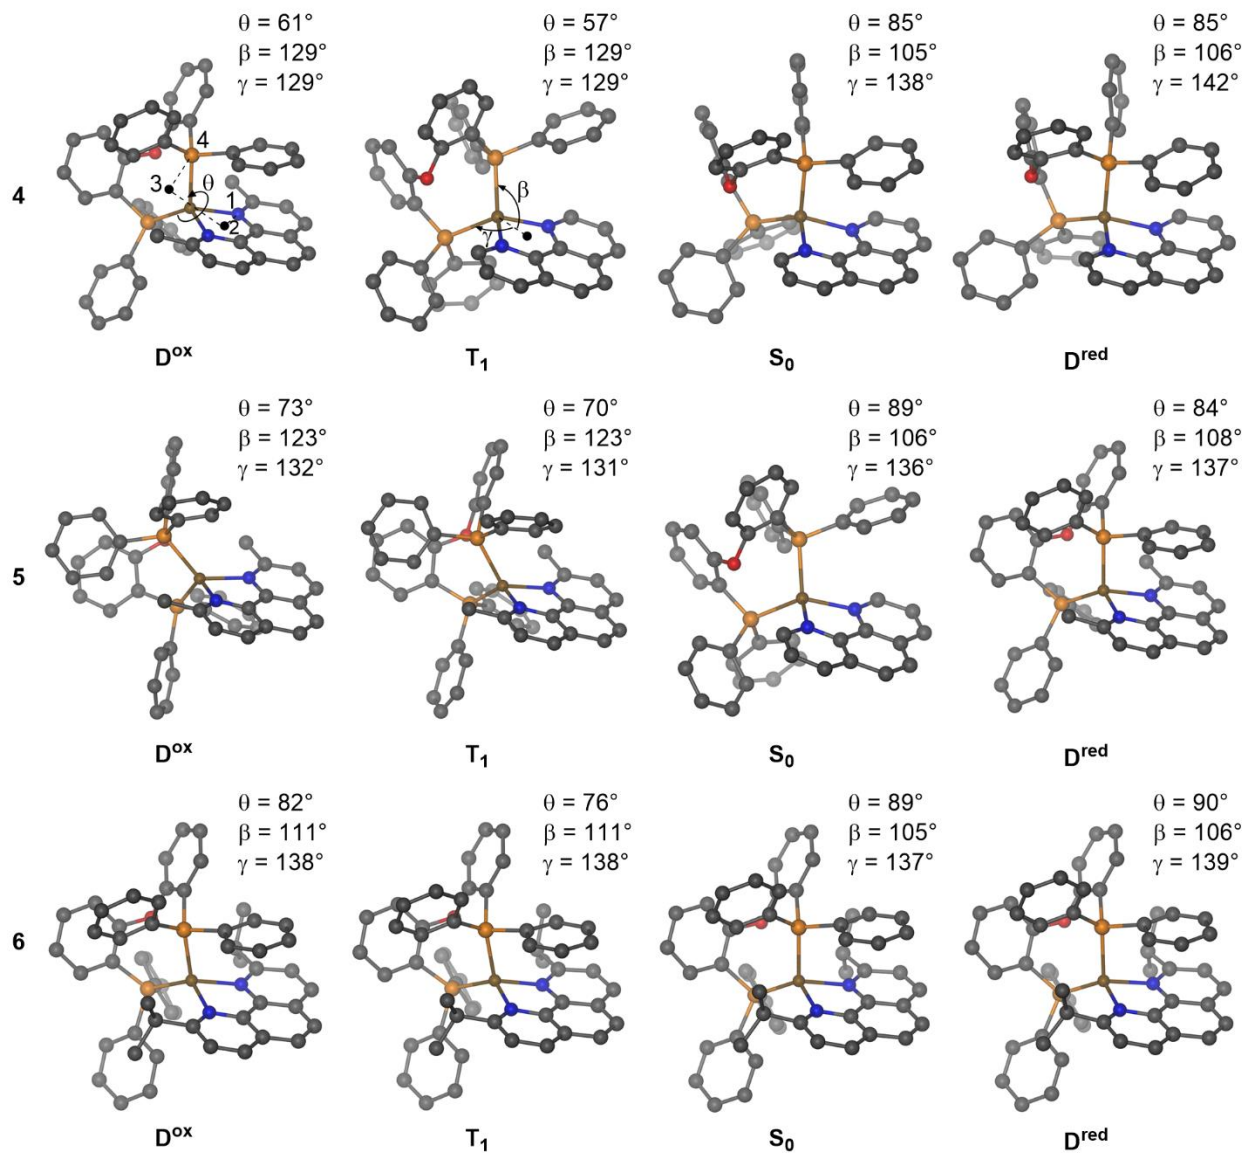

**Figure S6.** Computed equilibrium structures at the  $S_0$ ,  $T_1$ ,  $D^{ox}$ , and  $D^{red}$  states of complexes **4**, **5**, and **6**. The angles  $\theta$ ,  $\beta$ , and  $\gamma$  (°) that characterize the first coordination sphere of the metal complexes are provided

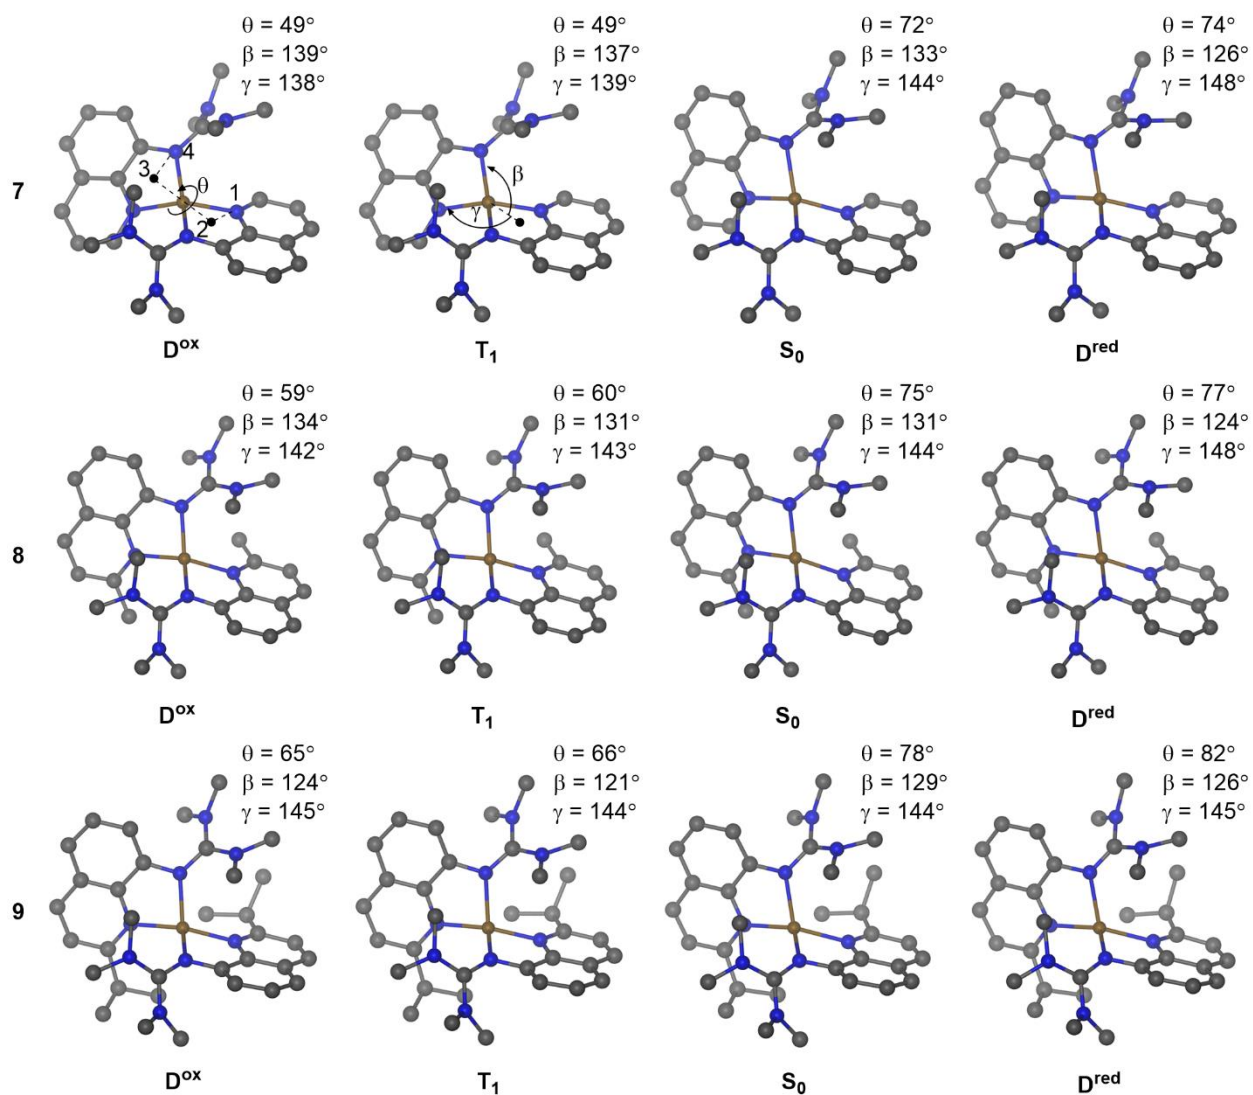

**Figure S7.** Computed equilibrium structures at the  $S_0$ ,  $T_1$ ,  $D^{ox}$ , and  $D^{red}$  states of complexes 7, 8, and 9. The angles  $\theta$ ,  $\beta$ , and  $\gamma$  (°) that characterize the first coordination sphere of the metal complexes are provided.

**Table S11.** Compilation of structural metrics for the equilibrium geometries of the **S<sub>0</sub>**, **T<sub>1</sub>**, **D<sup>ox</sup>**, and **D<sup>red</sup>** states for complexes **1-9**.  $d_{\text{Cu-N}}$  and  $d_{\text{Cu-P}}$  correspond to the average Cu–N and Cu–P distances in Å. Angles  $\Theta$ ,  $\beta$ , and  $\gamma$  are provided in degrees

| <b>Complex</b>         | <b>1</b>                                              |                            |                           |                            | <b>2</b>                                              |                            |                           |                            | <b>3</b>                                              |                            |                           |                            |
|------------------------|-------------------------------------------------------|----------------------------|---------------------------|----------------------------|-------------------------------------------------------|----------------------------|---------------------------|----------------------------|-------------------------------------------------------|----------------------------|---------------------------|----------------------------|
| <b>State</b>           | <b><math>d_{\text{Cu-N}}</math></b>                   | <b><math>\Theta</math></b> | <b><math>\beta</math></b> | <b><math>\gamma</math></b> | <b><math>d_{\text{Cu-N}}</math></b>                   | <b><math>\Theta</math></b> | <b><math>\beta</math></b> | <b><math>\gamma</math></b> | <b><math>d_{\text{Cu-N}}</math></b>                   | <b><math>\Theta</math></b> | <b><math>\beta</math></b> | <b><math>\gamma</math></b> |
| <b>S<sub>0</sub></b>   | 2.028                                                 | 90                         | 139                       | 139                        | 2.026                                                 | 88                         | 138                       | 139                        | 2.031                                                 | 89                         | 129                       | 147                        |
| <b>T<sub>1</sub></b>   | 1.982                                                 | 36                         | 139                       | 138                        | 1.985                                                 | 59                         | 137                       | 139                        | 1.998                                                 | 65                         | 137                       | 139                        |
| <b>D<sup>ox</sup></b>  | 1.997                                                 | 42                         | 139                       | 138                        | 2.003                                                 | 64                         | 137                       | 139                        | 2.007                                                 | 66                         | 139                       | 137                        |
| <b>D<sup>red</sup></b> | 2.022                                                 | 89                         | 140                       | 137                        | 2.019                                                 | 88                         | 139                       | 138                        | 2.023                                                 | 81                         | 132                       | 145                        |
| <b>Complex</b>         | <b>4</b>                                              |                            |                           |                            | <b>5</b>                                              |                            |                           |                            | <b>6</b>                                              |                            |                           |                            |
| <b>State</b>           | <b><math>d_{\text{Cu-N}} / d_{\text{Cu-P}}</math></b> | <b><math>\Theta</math></b> | <b><math>\beta</math></b> | <b><math>\gamma</math></b> | <b><math>d_{\text{Cu-N}} / d_{\text{Cu-P}}</math></b> | <b><math>\Theta</math></b> | <b><math>\beta</math></b> | <b><math>\gamma</math></b> | <b><math>d_{\text{Cu-N}} / d_{\text{Cu-P}}</math></b> | <b><math>\Theta</math></b> | <b><math>\beta</math></b> | <b><math>\gamma</math></b> |
| <b>S<sub>0</sub></b>   | 2.061 / 2.248                                         | 85                         | 105                       | 138                        | 2.074 / 2.258                                         | 89                         | 106                       | 136                        | 2.085 / 2.269                                         | 89                         | 105                       | 137                        |
| <b>T<sub>1</sub></b>   | 1.975 / 2.315                                         | 57                         | 129                       | 129                        | 1.995 / 2.330                                         | 70                         | 123                       | 131                        | 1.995 / 2.346                                         | 76                         | 111                       | 138                        |
| <b>D<sup>ox</sup></b>  | 2.043 / 2.297                                         | 61                         | 129                       | 129                        | 2.073 / 2.308                                         | 73                         | 123                       | 132                        | 2.073 / 2.317                                         | 82                         | 111                       | 138                        |
| <b>D<sup>red</sup></b> | 2.029 / 2.244                                         | 85                         | 106                       | 142                        | 2.032 / 2.249                                         | 84                         | 108                       | 137                        | 2.042 / 2.263                                         | 90                         | 106                       | 139                        |
| <b>Complex</b>         | <b>7</b>                                              |                            |                           |                            | <b>8</b>                                              |                            |                           |                            | <b>9</b>                                              |                            |                           |                            |
| <b>State</b>           | <b><math>d_{\text{Cu-N}}</math></b>                   | <b><math>\Theta</math></b> | <b><math>\beta</math></b> | <b><math>\gamma</math></b> | <b><math>d_{\text{Cu-N}}</math></b>                   | <b><math>\Theta</math></b> | <b><math>\beta</math></b> | <b><math>\gamma</math></b> | <b><math>d_{\text{Cu-N}}</math></b>                   | <b><math>\Theta</math></b> | <b><math>\beta</math></b> | <b><math>\gamma</math></b> |
| <b>S<sub>0</sub></b>   | 2.036                                                 | 72                         | 133                       | 144                        | 2.044                                                 | 75                         | 131                       | 144                        | 2.072                                                 | 78                         | 129                       | 144                        |
| <b>T<sub>1</sub></b>   | 1.969                                                 | 49                         | 137                       | 139                        | 1.985                                                 | 60                         | 131                       | 143                        | 2.003                                                 | 66                         | 121                       | 144                        |
| <b>D<sup>ox</sup></b>  | 1.981                                                 | 49                         | 139                       | 138                        | 1.993                                                 | 59                         | 134                       | 142                        | 2.011                                                 | 65                         | 124                       | 145                        |
| <b>D<sup>red</sup></b> | 2.041                                                 | 74                         | 126                       | 148                        | 2.053                                                 | 77                         | 124                       | 148                        | 2.069                                                 | 82                         | 126                       | 145                        |

**Table S12.** Dihedral angles change ( $\Delta\Theta$ ) upon each one of the redox events of the photoredox cycle for complexes **1-9**

| PC | $ \Delta\Theta $ ( $\mathbf{D}^{\text{ox}} \rightarrow \mathbf{S}_0$ ) | $ \Delta\Theta $ ( $\mathbf{S}_0 \rightarrow \mathbf{D}^{\text{red}}$ ) | $ \Delta\Theta $ ( $\mathbf{D}^{\text{ox}} \rightarrow \mathbf{T}_1$ ) | $ \Delta\Theta $ ( $\mathbf{T}_1 \rightarrow \mathbf{D}^{\text{red}}$ ) |
|----|------------------------------------------------------------------------|-------------------------------------------------------------------------|------------------------------------------------------------------------|-------------------------------------------------------------------------|
| 1  | 48.41                                                                  | 0.95                                                                    | 5.62                                                                   | 53.08                                                                   |
| 2  | 24.33                                                                  | 0.17                                                                    | 4.37                                                                   | 28.87                                                                   |
| 3  | 22.52                                                                  | 7.99                                                                    | 1.39                                                                   | 15.93                                                                   |
| 4  | 23.66                                                                  | 0.19                                                                    | 3.92                                                                   | 27.77                                                                   |
| 5  | 16.17                                                                  | 5.54                                                                    | 2.78                                                                   | 13.41                                                                   |
| 6  | 7.67                                                                   | 0.45                                                                    | 5.44                                                                   | 13.56                                                                   |
| 7  | 23.70                                                                  | 1.85                                                                    | 0.02                                                                   | 25.53                                                                   |
| 8  | 15.69                                                                  | 2.44                                                                    | 1.21                                                                   | 16.92                                                                   |
| 9  | 13.19                                                                  | 3.11                                                                    | 0.29                                                                   | 16.01                                                                   |



## 7. Theoretical square schemes

For an  $A/A^-$  redox couple, the contributions of vertical electron transfer (ET) and structural relaxation (SR) were estimated following equations 9 and 10, respectively. Where  $E^{\text{sol}}(A_{(A)})$  represents the solution state energy of species A,  $E^{\text{sol}}(A^-_{(A^-)})$  is the solution state energy of compound  $A^-$  and  $E^{\text{sol}}(A^-_{(A)})$  is the solution state energy of a nonequilibrium structure with the charge and multiplicity of  $A^-$  and the geometry of A.  $E^{\text{sol}}$  values were calculated through single-point calculations on the respective geometry at the TPSSh-D3/def2-TZVP level of theory.

$$EA = E^{\text{sol}}(A^-_{(A)}) - E^{\text{sol}}(A_{(A)}) \quad (9)$$

$$SR = E^{\text{sol}}(A^-_{(A^-)}) - E^{\text{sol}}(A^-_{(A)}) \quad (10)$$

Let us use the  $D^{\text{ox}} \rightarrow S_0$  redox event of complex **2** as a tutorial example. In this case,  $E^{\text{sol}}(A_{(A)})$  and  $E^{\text{sol}}(A^-_{(A^-)})$  correspond to the solution state energies of the  $D^{\text{ox}}$  and  $S_0$  states, respectively. These values are obtained as indicated in section S1.1 (see input files specified before). A single-point calculation is required to compute  $E^{\text{sol}}(A^-_{(A)})$ . For the  $D^{\text{ox}} \rightarrow S_0$  redox event, this corresponds to computing the solution state energy on the geometry of  $D^{\text{ox}}$  and the charge and multiplicity of the  $S_0$  state using the following input file (The lines for controlling the RAM allocation (%maxcore) and processors (%pal) are omitted for simplicity).

```
! TPSSh def2-TZVP d3 TightSCF SlowConv RIJCOSX defgrid2

!CPCM
%cpcm smd true
SMDsolvent "DICHLOROMETHANE"
surfacetype gepol_ses
rsolv 2.33
radius[1] 1.250
radius[6] 2.000
radius[7] 1.600
radius[29] 1.748
end

* xyz 1 1
Cu 3.81080208108758 8.75271149460812 1.02539382047211
N 3.94009921789056 6.75620521048136 0.88367367431585
N 5.68679183273613 8.61262607642444 1.70013139646962
N 2.77362342342012 9.49762691641693 -0.51167644551542
N 2.76085499924761 10.08280511105058 2.10043302301560
C 3.00597114509435 5.87113254008780 0.52522630254695
C 3.29183008917623 4.49036411089094 0.55316206040174
.
.
.
H 4.02519646125763 8.59920785297405 3.79768892839755
H 3.18960114949372 9.24054981033882 5.22458972696069
H 4.56237356601734 10.10983624215874 4.55228276923024
*
```

Table S13 compiles the resulting energies and the calculated vertical electron transfer (ET) and structural relaxation (SR) contributions to the driving force of the reduction process.

**Table S13.** Solution state energies and energy decomposition for the redox events of the photoredox cycle of complexes **1-9** into vertical electron attachment (EA) and structural relaxation (SR) steps. Energies are calculated in DCM and provided in kcal/mol

| Complex  | Redox event                                    | $E^{\text{sol}}(\text{A}_{(\text{A})})$ | $E^{\text{sol}}(\text{A}^-(\text{A}^-))$ | $E^{\text{sol}}(\text{A}^-(\text{A}))$ | EA      | SR     |
|----------|------------------------------------------------|-----------------------------------------|------------------------------------------|----------------------------------------|---------|--------|
| <b>1</b> | $\text{D}^{\text{ox}} \rightarrow \text{S}_0$  | -1747073.26                             | -1747189.47                              | -1747180.08                            | -106.82 | -9.39  |
|          | $\text{S}_0 \rightarrow \text{D}^{\text{red}}$ | -1747189.47                             | -1747250.57                              | -1747248.88                            | -59.41  | -1.69  |
|          | $\text{D}^{\text{ox}} \rightarrow \text{T}_1$  | -1747073.26                             | -1747158.72                              | -1747157.00                            | -83.74  | -1.72  |
|          | $\text{T}_1 \rightarrow \text{D}^{\text{red}}$ | -1747158.72                             | -1747250.57                              | -1747240.81                            | -82.09  | -9.76  |
| <b>2</b> | $\text{D}^{\text{ox}} \rightarrow \text{S}_0$  | -1845822.55                             | -1845946.38                              | -1845939.981                           | -117.43 | -6.40  |
|          | $\text{S}_0 \rightarrow \text{D}^{\text{red}}$ | -1845946.38                             | -1846005.67                              | -1846003.748                           | -57.37  | -1.92  |
|          | $\text{D}^{\text{ox}} \rightarrow \text{T}_1$  | -1845822.55                             | -1845905.45                              | -1845903.076                           | -80.53  | -2.37  |
|          | $\text{T}_1 \rightarrow \text{D}^{\text{red}}$ | -1845905.45                             | -1846005.67                              | -1845996.841                           | -91.39  | -8.83  |
| <b>3</b> | $\text{D}^{\text{ox}} \rightarrow \text{S}_0$  | -2043287.88                             | -2043413.27                              | -2043407.878                           | -120.00 | -5.39  |
|          | $\text{S}_0 \rightarrow \text{D}^{\text{red}}$ | -2043413.27                             | -2043471.98                              | -2043470.16                            | -56.89  | -1.82  |
|          | $\text{D}^{\text{ox}} \rightarrow \text{T}_1$  | -2043287.88                             | -2043371.05                              | -2043369.433                           | -81.55  | -1.62  |
|          | $\text{T}_1 \rightarrow \text{D}^{\text{red}}$ | -2043371.05                             | -2043471.98                              | -2043467.059                           | -96.01  | -4.92  |
| <b>4</b> | $\text{D}^{\text{ox}} \rightarrow \text{S}_0$  | -2735766.98                             | -2735893.19                              | -2735883.744                           | -116.76 | -9.45  |
|          | $\text{S}_0 \rightarrow \text{D}^{\text{red}}$ | -2735893.19                             | -2735953.29                              | -2735949.911                           | -56.72  | -3.38  |
|          | $\text{D}^{\text{ox}} \rightarrow \text{T}_1$  | -2735766.98                             | -2735846.65                              | -2735842.715                           | -75.73  | -3.94  |
|          | $\text{T}_1 \rightarrow \text{D}^{\text{red}}$ | -2735846.65                             | -2735953.29                              | -2735941.594                           | -94.94  | -11.70 |
| <b>5</b> | $\text{D}^{\text{ox}} \rightarrow \text{S}_0$  | -2785142.04                             | -2785269.96                              | -2785263.333                           | -121.29 | -6.63  |
|          | $\text{S}_0 \rightarrow \text{D}^{\text{red}}$ | -2785269.96                             | -2785327.55                              | -2785324.152                           | -54.19  | -3.40  |
|          | $\text{D}^{\text{ox}} \rightarrow \text{T}_1$  | -2785142.04                             | -2785217.51                              | -2785213.462                           | -71.42  | -4.05  |
|          | $\text{T}_1 \rightarrow \text{D}^{\text{red}}$ | -2785217.51                             | -2785327.55                              | -2785321.194                           | -103.68 | -6.36  |
| <b>6</b> | $\text{D}^{\text{ox}} \rightarrow \text{S}_0$  | -2883869.35                             | -2884000.70                              | -2883995.525                           | -126.18 | -5.17  |
|          | $\text{S}_0 \rightarrow \text{D}^{\text{red}}$ | -2884000.70                             | -2884057.72                              | -2884054.361                           | -53.66  | -3.36  |
|          | $\text{D}^{\text{ox}} \rightarrow \text{T}_1$  | -2883869.35                             | -2883945.57                              | -2883940.534                           | -71.18  | -5.04  |
|          | $\text{T}_1 \rightarrow \text{D}^{\text{red}}$ | -2883945.57                             | -2884057.72                              | -2884051.026                           | -105.46 | -6.69  |
| <b>7</b> | $\text{D}^{\text{ox}} \rightarrow \text{S}_0$  | -1987829.82                             | -1987933.72                              | -1987926.478                           | -96.66  | -7.24  |
|          | $\text{S}_0 \rightarrow \text{D}^{\text{red}}$ | -1987933.72                             | -1987986.74                              | -1987985.924                           | -52.20  | -0.82  |
|          | $\text{D}^{\text{ox}} \rightarrow \text{T}_1$  | -1987829.82                             | -1987902.67                              | -1987901.07                            | -71.25  | -1.60  |
|          | $\text{T}_1 \rightarrow \text{D}^{\text{red}}$ | -1987902.67                             | -1987986.74                              | -1987979.953                           | -77.28  | -6.79  |
| <b>8</b> | $\text{D}^{\text{ox}} \rightarrow \text{S}_0$  | -2037204.41                             | -2037310.57                              | -2037305.528                           | -101.12 | -5.04  |
|          | $\text{S}_0 \rightarrow \text{D}^{\text{red}}$ | -2037310.57                             | -2037361.24                              | -2037359.767                           | -49.20  | -1.47  |
|          | $\text{D}^{\text{ox}} \rightarrow \text{T}_1$  | -2037204.41                             | -2037273.58                              | -2037271.86                            | -67.45  | -1.72  |
|          | $\text{T}_1 \rightarrow \text{D}^{\text{red}}$ | -2037273.58                             | -2037361.24                              | -2037355.86                            | -82.28  | -5.38  |
| <b>9</b> | $\text{D}^{\text{ox}} \rightarrow \text{S}_0$  | -2135925.49                             | -2136033.88                              | -2136028.83                            | -103.34 | -5.05  |
|          | $\text{S}_0 \rightarrow \text{D}^{\text{red}}$ | -2136033.88                             | -2136083.86                              | -2136082.49                            | -48.61  | -1.37  |

|                                                    |             |             |             |        |       |
|----------------------------------------------------|-------------|-------------|-------------|--------|-------|
| $\mathbf{D}^{\text{ox}} \rightarrow \mathbf{T}_1$  | -2135925.49 | -2135993.94 | -2135992.40 | -66.91 | -1.54 |
| $\mathbf{T}_1 \rightarrow \mathbf{D}^{\text{red}}$ | -2135993.94 | -2136083.86 | -2136077.32 | -83.38 | -6.54 |

Figure S8 shows the theoretical square scheme for the  $\mathbf{T}_1 \rightarrow \mathbf{D}^{\text{red}}$  process. A similar protocol to the one shown before can be employed to build the theoretical square schemes for this reduction process as well as the ligand-centered reductions  $\mathbf{D}^{\text{ox}} \rightarrow \mathbf{T}_1$  and  $\mathbf{S}_0 \rightarrow \mathbf{D}^{\text{red}}$ . Note that for all calculations reported herein, the analyses are always carried out in the reduction direction.

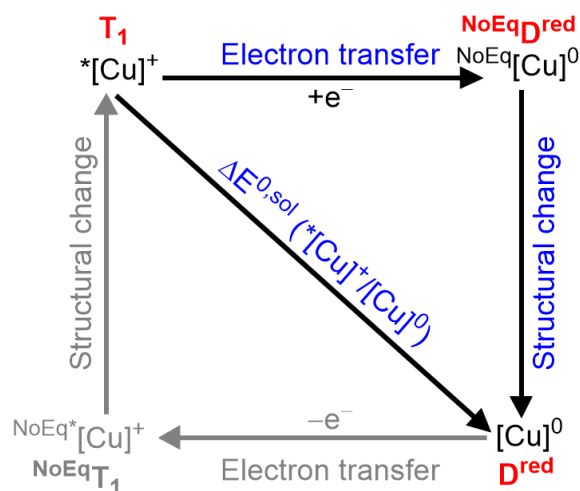

**Figure S8.** Theoretical square scheme that was implemented to separate the redox events of the photoredox cycle into vertical electron transfer (ET) and structural relaxation (SR) steps. The picture exemplifies the separation for the excited state metal-centered  $^*\text{[Cu(II)]}^+$  ( $\mathbf{T}_1$ )  $\rightarrow$   $[\text{Cu(I)}]^0$  ( $\mathbf{D}^{\text{red}}$ ) reduction.  $^{\text{NoEq}}[\text{Cu}]^0$  denotes a non-equilibrium structure with the geometry of  $^*\text{[Cu(II)]}^+$

## 8. Internal reorganization energies for the electron self-exchange reaction

Internal reorganization energies ( $\lambda_T$ ) for the electron self-exchange reaction were calculated in DCM using Nelsen's four-point method (Figure S9) at the =TPSSh-D3/def2-TZVP level of theory. The total internal reorganization energy is the sum of the individual reorganization energies ( $\lambda_i$ ) of the oxidized (A) and reduced ( $A^-$ ) species (equations 11-13).

$$\lambda_T = \lambda_A + \lambda_{A^-} \quad (11)$$

$$\lambda_A = E^{\text{sol}}(A_{(A^-)}) - E^{\text{sol}}(A_{(A)}) \quad (12)$$

$$\lambda_{A^-} = E^{\text{sol}}(A^-_{(A)}) - E^{\text{sol}}(A^-_{(A^-)}) \quad (13)$$

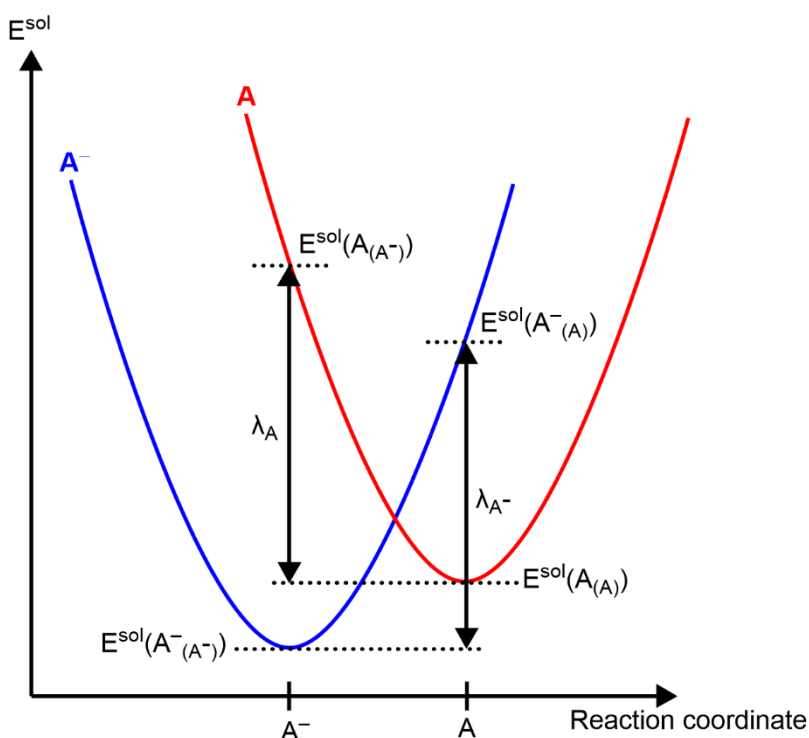

**Figure S9.** Representation of Nelsen's four-point method for the calculation of the internal reorganization energies ( $\lambda_i$ ) of the oxidized (A) and reduced ( $A^-$ ) species in the context of an electron self-exchange reaction

Again, for the  $D^{\text{ox}} \rightarrow S_0$  redox event of complex **2**,  $E^{\text{sol}}(A_{(A)})$  and  $E^{\text{sol}}(A^-_{(A^-)})$  are the solution state energies of the  $D^{\text{ox}}$  and  $S_0$  states, respectively (*vide supra*).  $E^{\text{sol}}(A^-_{(A)})$  and  $E^{\text{sol}}(A_{(A^-)})$  are calculated with single-point calculations using the provided inputs (The lines for controlling the RAM allocation (%maxcore) and processors (%pal) are omitted for simplicity). As mentioned above,  $E^{\text{sol}}(A_{(A^-)})$  is the solution state energy of a non-equilibrium species with the geometry of  $D^{\text{ox}}$  and the charge and multiplicity of  $S_0$ . Conversely,  $E^{\text{sol}}(A^-_{(A)})$  corresponds to the non-equilibrium species with  $S_0$  geometry and the charge and multiplicity of  $D^{\text{ox}}$ .

### Input file to calculate $E^{\text{sol}}(\text{A}_{(\text{A}^-)})$

```
! TPSSh def2-TZVP d3 TightSCF SlowConv RIJCOSX defgrid2

!CPCM
%cpcm smd true
SMDsolvent "DICHLOROMETHANE"
surfacetype gepol_ses
rsolv 2.33
radius[1] 1.250
radius[6] 2.000
radius[7] 1.600
radius[29] 1.748
end

* xyz 1 1
Cu 3.81080208108758 8.75271149460812 1.02539382047211
N 3.94009921789056 6.75620521048136 0.88367367431585
N 5.68679183273613 8.61262607642444 1.70013139646962
N 2.77362342342012 9.49762691641693 -0.51167644551542
N 2.76085499924761 10.08280511105058 2.10043302301560
C 3.00597114509435 5.87113254008780 0.52522630254695
C 3.29183008917623 4.49036411089094 0.55316206040174
.
.
.
H 4.02519646125763 8.59920785297405 3.79768892839755
H 3.18960114949372 9.24054981033882 5.22458972696069
H 4.56237356601734 10.10983624215874 4.55228276923024
*
```

### Input file to calculate $E^{\text{sol}}(\text{A}^-_{(\text{A})})$

```
! TPSSh def2-TZVP d3 TightSCF SlowConv RIJCOSX defgrid2

!CPCM
%cpcm smd true
SMDsolvent "DICHLOROMETHANE"
surfacetype gepol_ses
rsolv 2.33
radius[1] 1.250
radius[6] 2.000
radius[7] 1.600
radius[29] 1.748
end

* xyz 2 2
Cu 3.78618454890123 8.73585660105153 1.04731521051368
N 3.90208830350401 6.71293562409774 1.14666985784901
N 5.77051366583172 8.60757917889728 1.42773688549201
N 2.93747318909698 9.71983662178366 -0.50551149761289
N 2.51820235163825 9.88479643309250 2.13183007265793
C 2.93897002448102 5.80234039852265 0.99266436014885
C 3.22163291603248 4.42617167281352 1.08106976936983
H 2.41753091721533 3.71387792414380 0.94693449633693
.
```

|   |                  |                  |                  |
|---|------------------|------------------|------------------|
| H | 3.31486723296830 | 8.06978047771496 | 3.81341544613296 |
| H | 2.80887077200594 | 8.92504045306826 | 5.29405513411201 |
| H | 4.21854137172579 | 9.47235397735990 | 4.37493688551659 |
| * |                  |                  |                  |

Table S14 compiles the resulting energies and the calculated internal reorganization energies for the electron self-exchange reaction.

**Table S14.** Calculated internal reorganization energies (kcal/mol) for the electron self-exchange reaction of the redox events of the photoredox cycle of complexes **1-9**

| Complex | Redox event                                    | $E^{\text{sol}}(\text{A}_{(\text{A})})$ | $E^{\text{sol}}(\text{A}_{(\text{A}^-)})$ | $E^{\text{sol}}(\text{A}^-(\text{A}^-))$ | $E^{\text{sol}}(\text{A}^-(\text{A}))$ | $\lambda_{\text{A}}$ | $\lambda_{\text{A}^-}$ | $\lambda_{\text{T}}$ |
|---------|------------------------------------------------|-----------------------------------------|-------------------------------------------|------------------------------------------|----------------------------------------|----------------------|------------------------|----------------------|
| 1       | $\text{D}^{\text{ox}} \rightarrow \text{S}_0$  | -1747073.26                             | -1747056.30                               | -1747189.47                              | -1747180.08                            | 16.96                | 9.39                   | 26.35                |
|         | $\text{S}_0 \rightarrow \text{D}^{\text{red}}$ | -1747189.47                             | -1747187.76                               | -1747250.57                              | -1747248.88                            | 1.71                 | 1.69                   | 3.40                 |
|         | $\text{D}^{\text{ox}} \rightarrow \text{T}_1$  | -1747073.26                             | -1747071.66                               | -1747158.72                              | -1747157.00                            | 1.60                 | 1.72                   | 3.32                 |
|         | $\text{T}_1 \rightarrow \text{D}^{\text{red}}$ | -1747158.72                             | -1747138.90                               | -1747250.57                              | -1747240.81                            | 19.82                | 9.76                   | 29.58                |
| 2       | $\text{D}^{\text{ox}} \rightarrow \text{S}_0$  | -1845822.55                             | -1845815.17                               | -1845946.38                              | -1845939.98                            | 7.38                 | 6.40                   | 13.78                |
|         | $\text{S}_0 \rightarrow \text{D}^{\text{red}}$ | -1845946.38                             | -1845944.55                               | -1846005.67                              | -1846003.75                            | 1.83                 | 1.92                   | 3.75                 |
|         | $\text{D}^{\text{ox}} \rightarrow \text{T}_1$  | -1845822.55                             | -1845820.30                               | -1845905.45                              | -1845903.08                            | 2.25                 | 2.37                   | 4.63                 |
|         | $\text{T}_1 \rightarrow \text{D}^{\text{red}}$ | -1845905.45                             | -1845895.93                               | -1846005.67                              | -1845996.84                            | 9.52                 | 8.83                   | 18.34                |
| 3       | $\text{D}^{\text{ox}} \rightarrow \text{S}_0$  | -2043287.88                             | -2043280.86                               | -2043413.27                              | -2043407.88                            | 7.02                 | 5.39                   | 12.41                |
|         | $\text{S}_0 \rightarrow \text{D}^{\text{red}}$ | -2043413.27                             | -2043410.64                               | -2043471.98                              | -2043470.16                            | 2.63                 | 1.82                   | 4.45                 |
|         | $\text{D}^{\text{ox}} \rightarrow \text{T}_1$  | -2043287.88                             | -2043286.15                               | -2043371.05                              | -2043369.43                            | 1.73                 | 1.62                   | 3.35                 |
|         | $\text{T}_1 \rightarrow \text{D}^{\text{red}}$ | -2043371.05                             | -2043364.45                               | -2043471.98                              | -2043467.06                            | 6.60                 | 4.92                   | 11.53                |
| 4       | $\text{D}^{\text{ox}} \rightarrow \text{S}_0$  | -2735766.98                             | -2735758.68                               | -2735893.19                              | -2735883.74                            | 8.30                 | 9.45                   | 17.74                |
|         | $\text{S}_0 \rightarrow \text{D}^{\text{red}}$ | -2735893.19                             | -2735889.54                               | -2735953.29                              | -2735949.91                            | 3.65                 | 3.38                   | 7.03                 |
|         | $\text{D}^{\text{ox}} \rightarrow \text{T}_1$  | -2735766.98                             | -2735762.58                               | -2735846.65                              | -2735842.71                            | 4.40                 | 3.94                   | 8.33                 |
|         | $\text{T}_1 \rightarrow \text{D}^{\text{red}}$ | -2735846.65                             | -2735835.81                               | -2735953.29                              | -2735941.59                            | 10.84                | 11.70                  | 22.54                |
| 5       | $\text{D}^{\text{ox}} \rightarrow \text{S}_0$  | -2785142.04                             | -2785134.18                               | -2785269.96                              | -2785263.33                            | 7.86                 | 6.63                   | 14.49                |
|         | $\text{S}_0 \rightarrow \text{D}^{\text{red}}$ | -2785269.96                             | -2785266.13                               | -2785327.55                              | -2785324.15                            | 3.83                 | 3.40                   | 7.22                 |
|         | $\text{D}^{\text{ox}} \rightarrow \text{T}_1$  | -2785142.04                             | -2785135.67                               | -2785217.51                              | -2785213.46                            | 6.37                 | 4.05                   | 10.42                |
|         | $\text{T}_1 \rightarrow \text{D}^{\text{red}}$ | -2785217.51                             | -2785209.38                               | -2785327.55                              | -2785321.19                            | 8.13                 | 6.36                   | 14.49                |
| 6       | $\text{D}^{\text{ox}} \rightarrow \text{S}_0$  | -2883869.35                             | -2883864.93                               | -2884000.70                              | -2883995.53                            | 4.42                 | 5.17                   | 9.60                 |
|         | $\text{S}_0 \rightarrow \text{D}^{\text{red}}$ | -2884000.70                             | -2883997.12                               | -2884057.72                              | -2884054.36                            | 3.58                 | 3.36                   | 6.94                 |
|         | $\text{D}^{\text{ox}} \rightarrow \text{T}_1$  | -2883869.35                             | -2883865.04                               | -2883945.57                              | -2883940.53                            | 4.31                 | 5.04                   | 9.34                 |
|         | $\text{T}_1 \rightarrow \text{D}^{\text{red}}$ | -2883945.57                             | -2883939.99                               | -2884057.72                              | -2884051.03                            | 5.58                 | 6.69                   | 12.28                |
| 7       | $\text{D}^{\text{ox}} \rightarrow \text{S}_0$  | -1987829.82                             | -1987820.24                               | -1987933.72                              | -1987926.48                            | 9.58                 | 7.24                   | 16.82                |
|         | $\text{S}_0 \rightarrow \text{D}^{\text{red}}$ | -1987933.72                             | -1987930.03                               | -1987986.74                              | -1987985.92                            | 3.69                 | 0.82                   | 4.51                 |
|         | $\text{D}^{\text{ox}} \rightarrow \text{T}_1$  | -1987829.82                             | -1987827.66                               | -1987902.67                              | -1987901.07                            | 2.16                 | 1.60                   | 3.76                 |

|   |                                  |             |             |             |             |       |      |       |
|---|----------------------------------|-------------|-------------|-------------|-------------|-------|------|-------|
|   | $T_1 \rightarrow D^{\text{red}}$ | -1987902.67 | -1987889.78 | -1987986.74 | -1987979.95 | 12.89 | 6.79 | 19.67 |
| 8 | $D^{\text{ox}} \rightarrow S_0$  | -2037204.41 | -2037196.71 | -2037310.57 | -2037305.53 | 7.70  | 5.04 | 12.74 |
|   | $S_0 \rightarrow D^{\text{red}}$ | -2037310.57 | -2037306.38 | -2037361.24 | -2037359.77 | 4.19  | 1.47 | 5.66  |
|   | $D^{\text{ox}} \rightarrow T_1$  | -2037204.41 | -2037200.72 | -2037273.58 | -2037271.86 | 3.69  | 1.72 | 5.41  |
|   | $T_1 \rightarrow D^{\text{red}}$ | -2037273.58 | -2037263.76 | -2037361.24 | -2037355.86 | 9.82  | 5.38 | 15.20 |
|   | $D^{\text{ox}} \rightarrow S_0$  | -2135925.49 | -2135918.93 | -2136033.88 | -2136028.83 | 6.56  | 5.05 | 11.60 |
| 9 | $S_0 \rightarrow D^{\text{red}}$ | -2136033.88 | -2136030.89 | -2136083.86 | -2136082.49 | 2.99  | 1.37 | 4.36  |
|   | $D^{\text{ox}} \rightarrow T_1$  | -2135925.49 | -2135922.74 | -2135993.94 | -2135992.40 | 2.75  | 1.54 | 4.29  |
|   | $T_1 \rightarrow D^{\text{red}}$ | -2135993.94 | -2135986.38 | -2136083.86 | -2136077.32 | 7.56  | 6.54 | 14.10 |
|   |                                  |             |             |             |             |       |      |       |

## 9. S<sub>0</sub> – T<sub>1</sub> energy gaps

**Table S15.** Compilation of the available experimental <sup>3</sup>MLCT lifetimes for the species studied. Values are reported in DCM at 298 K.

| Complex | $\tau$ (ns) | Ref. |
|---------|-------------|------|
| 1       | No emission | -    |
| 2       | 90          | 29   |
| 3       | 365         | 9    |
| 4       | 190         | 30   |
| 5       | 320         | 31   |

**Table S16.** Calculated S<sub>0</sub> – T<sub>1</sub> energy gaps ( $\Delta G^{\text{sol}}_{\text{S}_0-\text{T}_1}$ ) in DCM for complexes **1-9**. Experimental E<sub>0,0</sub> energies estimated from the maximum emission spectra of the complexes at 298K are provided in parentheses

| Complex | G <sup>sol</sup> (S <sub>0</sub> )<br>(kcal/mol) | G <sup>sol</sup> (T <sub>1</sub> )<br>(kcal/mol) | $\Delta G^{\text{sol}}_{\text{S}_0-\text{T}_1}$<br>(eV) |
|---------|--------------------------------------------------|--------------------------------------------------|---------------------------------------------------------|
| 1       | -1747003.79                                      | -1746973.38                                      | 1.32                                                    |
| 2       | -1845697.36                                      | -1845656.42                                      | 1.78 (1.70)                                             |
| 3       | -2043027.75                                      | -2042987.56                                      | 1.74 (1.83)                                             |
| 4       | -2735496.01                                      | -2735451.10                                      | 1.95 (1.91)                                             |
| 5       | -2784839.54                                      | -2784788.97                                      | 2.19 (2.18)                                             |
| 6       | -2883500.93                                      | -2883448.07                                      | 2.29                                                    |
| 7       | -1987591.18                                      | -1987560.34                                      | 1.34                                                    |
| 8       | -2036935.91                                      | -2036899.23                                      | 1.59                                                    |
| 9       | -2135589.59                                      | -2135550.74                                      | 1.68                                                    |



## 10. Cartesian coordinates of optimized structures

Cartesian coordinates of the gas-phase optimized equilibrium structures (in Å) at TPSSh-D3/def2-TZVP(-f)/defgrid2 level of theory. S is the total spin angular momentum ( $M=2S+1$ ).

### [1]<sup>2+</sup> - D<sup>ox</sup> (S = 1)

Eh = -2783.893877975775

|    |                   |                   |                   |
|----|-------------------|-------------------|-------------------|
| Cu | 3.80094923904876  | 8.75352839061488  | 1.06445487192206  |
| N  | 4.06602922316402  | 6.81506945660716  | 0.66816228408882  |
| N  | 5.58215255016417  | 8.57905282163593  | 1.95231755064803  |
| N  | 2.62715275082806  | 9.36415567442165  | -0.43133850996107 |
| N  | 2.94250509736615  | 10.26498321505448 | 2.04817059773646  |
| C  | 3.24716197710438  | 5.95084258534986  | 0.07280101667686  |
| C  | 3.57396665155672  | 4.59743269590527  | -0.07137465812840 |
| H  | 2.87283928543073  | 3.93422867164584  | -0.56013878289474 |
| C  | 4.78229763668209  | 4.13443676951673  | 0.40577031646835  |
| H  | 5.05691205252504  | 3.09228049272090  | 0.29202598992032  |
| C  | 5.66320503401758  | 5.02526603262375  | 1.05294782606411  |
| C  | 6.93542649550250  | 4.65048871809012  | 1.59287903908882  |
| H  | 7.25461715325594  | 3.61987708000497  | 1.49757329540711  |
| C  | 7.73318203467514  | 5.56474033168937  | 2.20957453732204  |
| H  | 8.69729753132654  | 5.27187989177562  | 2.60687481099300  |
| C  | 7.32003699719832  | 6.92828194383580  | 2.35308083449234  |
| C  | 8.09272433381815  | 7.93011583378817  | 2.97555959573998  |
| H  | 9.06637307808187  | 7.68448744191185  | 3.38314434779381  |
| C  | 7.60377196497092  | 9.21723589095124  | 3.05385463503390  |
| H  | 8.17985031664310  | 10.00876852163524 | 3.51423179626086  |
| C  | 6.33710719201229  | 9.50831756289431  | 2.53386804375289  |
| C  | 5.24617649064007  | 6.36409218948677  | 1.17034962460531  |
| C  | 6.06667564672177  | 7.31328651647836  | 1.84203665469793  |
| C  | 2.54678454790502  | 8.91963352055771  | -1.68341045325219 |
| C  | 1.70295012873984  | 9.51330665153787  | -2.62943803319171 |
| H  | 1.67634891289958  | 9.11649956709826  | -3.63552242782033 |
| C  | 0.91884125922052  | 10.58703789390996 | -2.26300918349931 |
| H  | 0.25087769979933  | 11.05171976562003 | -2.97877733038181 |
| C  | 0.99443044613730  | 11.08756025367949 | -0.94697260221345 |
| C  | 0.23408183801452  | 12.20058540158900 | -0.46384759014725 |
| H  | -0.45121955774344 | 12.69303534521164 | -1.14280792240361 |
| C  | 0.36121984678151  | 12.63312852055993 | 0.82044537288332  |
| H  | -0.22508800679265 | 13.47082239784637 | 1.17766610181581  |
| C  | 1.27110266670828  | 11.99969191612569 | 1.72661588879772  |
| C  | 1.45341295857185  | 12.38895668646422 | 3.06966208618049  |
| H  | 0.88455949502426  | 13.21877127190121 | 3.47242955077430  |
| C  | 2.35099040420802  | 11.70380286846621 | 3.86143761888339  |
| H  | 2.50191913236992  | 11.97155473202274 | 4.89867994848340  |
| C  | 3.08603646083544  | 10.64472272060313 | 3.31588283877445  |
| C  | 1.88284420198183  | 10.44205921057782 | -0.06723311320240 |
| C  | 2.03827984727694  | 10.91327074904788 | 1.26661832946907  |
| H  | 3.17115710415084  | 8.07475757956212  | -1.94520880204709 |
| H  | 3.79760095910330  | 10.09205298424432 | 3.91631918017247  |
| H  | 2.30598907928364  | 6.34004719364082  | -0.29448020972958 |
| H  | 5.93046122678981  | 10.51046022509521 | 2.58401792892549  |

### [1]<sup>0</sup> - D<sup>red</sup> (S = 1)

Eh = -2784.360286925258

|    |                  |                  |                  |
|----|------------------|------------------|------------------|
| Cu | 3.77297982980538 | 8.73235596023766 | 1.09399859098975 |
| N  | 3.88927657974401 | 6.71651800690688 | 1.20570447036160 |

|   |                   |                   |                   |
|---|-------------------|-------------------|-------------------|
| N | 5.76475736692893  | 8.61699190471867  | 1.42643336923442  |
| N | 2.96785054246021  | 9.72701240144733  | -0.47171062511453 |
| N | 2.47952259708923  | 9.86325081258254  | 2.15978925825177  |
| C | 2.94347542893831  | 5.77690977930520  | 1.13951881315261  |
| C | 3.19889682459704  | 4.41442236308669  | 1.27519454037049  |
| H | 2.38259019561292  | 3.70799335279804  | 1.19677431530060  |
| C | 4.50673511562901  | 3.98652733574452  | 1.49028174919106  |
| H | 4.74125876565667  | 2.93275380370923  | 1.58908931596156  |
| C | 5.52860215138276  | 4.93748952625425  | 1.57446198256695  |
| C | 6.90683765027158  | 4.60288059741866  | 1.77649861803117  |
| H | 7.17218475613777  | 3.55604172409568  | 1.87789178947293  |
| C | 7.86611341991487  | 5.56382165814754  | 1.83093558372753  |
| H | 8.90644752504091  | 5.29314233428404  | 1.97585052266239  |
| C | 7.53688320825417  | 6.95280233173947  | 1.70834493373958  |
| C | 8.48349717591081  | 7.98005589648589  | 1.77379393922985  |
| H | 9.53086499439167  | 7.74020553354615  | 1.91741603270113  |
| C | 8.05835037178601  | 9.30137937174387  | 1.65593660299898  |
| H | 8.76006971819959  | 10.12379563782406 | 1.70877768132206  |
| C | 6.70183172378254  | 9.56631529481533  | 1.48642974800927  |
| C | 5.18014875969535  | 6.30623485545656  | 1.43690250784415  |
| C | 6.17608949858288  | 7.30935126514500  | 1.52197876443174  |
| C | 3.25237818319820  | 9.68985015481200  | -1.77539285393381 |
| C | 2.62880193445748  | 10.49669402232563 | -2.72396870723285 |
| H | 2.90144753983063  | 10.40248089767404 | -3.76720460265261 |
| C | 1.64982005059220  | 11.39737600863638 | -2.31116048328751 |
| H | 1.13699080335557  | 12.03185129044326 | -3.02508469497953 |
| C | 1.32594430862495  | 11.47557681209276 | -0.95303103369648 |
| C | 0.32496681887189  | 12.35537303225782 | -0.42730459507473 |
| H | -0.20598327496476 | 13.00147839673097 | -1.11810146365933 |
| C | 0.03363084598069  | 12.38029841604122 | 0.89977960835080  |
| H | -0.73323577992873 | 13.04585529465252 | 1.28119542021615  |
| C | 0.72986028215022  | 11.54340421811371 | 1.83114092888381  |
| C | 0.47999012950771  | 11.54427690566630 | 3.20703807344154  |
| H | -0.28225078504660 | 12.19727924230396 | 3.61661896225542  |
| C | 1.22371978315714  | 10.70253294358421 | 4.03091904770412  |
| H | 1.06404563557271  | 10.68007880892393 | 5.10122605059655  |
| C | 2.20365058498478  | 9.89024654954865  | 3.46599567223546  |
| C | 2.01839512617452  | 10.62663416911124 | -0.05125556160513 |
| C | 1.73678320470125  | 10.67460972147618 | 1.33567554699612  |
| H | 2.80539217611371  | 9.23698060472764  | 4.08793865430918  |
| H | 4.00780128638944  | 8.97080468229723  | -2.07212783489470 |
| H | 1.93604760698593  | 6.13458227304026  | 0.95821962282030  |
| H | 6.34414334847838  | 10.58672732304664 | 1.40580265577017  |

**[1]<sup>+</sup> - s<sub>0</sub> (s = 0)**

Eh = -2784.220779973

|    |                  |                  |                   |
|----|------------------|------------------|-------------------|
| Cu | 3.78097711899206 | 8.73184049448938 | 1.05890097652368  |
| N  | 3.89760327143545 | 6.71106021088169 | 1.17689763917553  |
| N  | 5.77287933714030 | 8.61143151603986 | 1.41973453210364  |
| N  | 2.95292704503478 | 9.73240613881555 | -0.49649621930002 |
| N  | 2.49616610732579 | 9.86894536747737 | 2.14225584429677  |
| C  | 2.95480438687188 | 5.78155668077197 | 1.05076486069720  |
| C  | 3.21924466140400 | 4.41056050524264 | 1.15461841861379  |
| H  | 2.40873822266838 | 3.70243724550858 | 1.04184137833411  |
| C  | 4.50775936196451 | 3.98814619290629 | 1.39866013648381  |
| H  | 4.74171613786408 | 2.93344232326905 | 1.48402399995039  |
| C  | 5.53129722463845 | 4.94426932276143 | 1.53806097914892  |

|   |                   |                   |                   |
|---|-------------------|-------------------|-------------------|
| C | 6.89782049879219  | 4.60367036832145  | 1.79247879187651  |
| H | 7.16122250686549  | 3.55645213199804  | 1.88279047256393  |
| C | 7.84791822360803  | 5.56714072276757  | 1.91915832532317  |
| H | 8.88007615482159  | 5.29958047837952  | 2.11216608927521  |
| C | 7.51294739436922  | 6.95354975421055  | 1.80108246887890  |
| C | 8.45580482087330  | 7.99143681583902  | 1.92388531303306  |
| H | 9.49505082223753  | 7.75380274963683  | 2.11860575028758  |
| C | 8.04015480161851  | 9.29859357344620  | 1.79430791777546  |
| H | 8.73834548747095  | 10.12055872691539 | 1.88363606014687  |
| C | 6.68946090371152  | 9.56731888770636  | 1.54166211306830  |
| C | 5.17175025394355  | 6.30315575467125  | 1.41701846383975  |
| C | 6.17393535262618  | 7.31901377654490  | 1.54831106852883  |
| C | 3.19253574415656  | 9.65074744536483  | -1.80211761719121 |
| C | 2.51472515767127  | 10.42699305152247 | -2.74983615504680 |
| H | 2.75461086803420  | 10.31495500140275 | -3.79911128290555 |
| C | 1.55420302389556  | 11.32019140232068 | -2.32811300973903 |
| H | 1.01375928888141  | 11.93416352471134 | -3.03904087022475 |
| C | 1.27430088006297  | 11.43301120226667 | -0.95327472319631 |
| C | 0.29498754335240  | 12.33026446803530 | -0.42020827984168 |
| H | -0.26083576716137 | 12.95661505837013 | -1.10792434198369 |
| C | 0.06262453289892  | 12.39923051392918 | 0.91701753733336  |
| H | -0.68121622582040 | 13.08121457958575 | 1.31167528005200  |
| C | 0.79003593674839  | 11.57730199230717 | 1.83541696298450  |
| C | 0.58963140370964  | 11.60779674557779 | 3.22831453319981  |
| H | -0.14802244744475 | 12.27975740357101 | 3.65115345610981  |
| C | 1.33796864576613  | 10.77884540850586 | 4.03525193839325  |
| H | 1.20930641472583  | 10.77677226957309 | 5.10974604714243  |
| C | 2.28159279296475  | 9.92340286885487  | 3.45360924866614  |
| C | 2.00672959596958  | 10.61073398095215 | -0.07150869738848 |
| C | 1.76232318430670  | 10.68347452609565 | 1.33870648300402  |
| H | 3.95214231209280  | 8.94105858605126  | -2.10683106528362 |
| H | 2.88230934262570  | 9.26181256850739  | 4.06599686605860  |
| H | 1.95055761405817  | 6.13977804760099  | 0.85916746072870  |
| H | 6.33726566022767  | 10.58613553329256 | 1.43443807950307  |

**[11]<sup>+</sup> - T<sub>1</sub> (S = 2)**

Eh = -2784.169430621353

|    |                  |                   |                   |
|----|------------------|-------------------|-------------------|
| Cu | 3.79899751006794 | 8.75196358672548  | 1.06594846052722  |
| N  | 4.09059674348253 | 6.84448798440381  | 0.61825303780424  |
| N  | 5.53536841254584 | 8.56407395908435  | 2.00298335660066  |
| N  | 2.58914243374126 | 9.31774921161079  | -0.39774328420605 |
| N  | 2.99504916454937 | 10.29125895686555 | 2.02045411339909  |
| C  | 3.28694572316828 | 5.97409205897925  | -0.00881810991259 |
| C  | 3.61845817840753 | 4.63502638429235  | -0.17181719726566 |
| H  | 2.93141237373940 | 3.98163591596248  | -0.69229896731634 |
| C  | 4.82745033903992 | 4.15656191875208  | 0.32612141658256  |
| H  | 5.10872685133177 | 3.11898295149764  | 0.19355756873936  |
| C  | 5.67878967240405 | 5.03153562266177  | 1.01164181074377  |
| C  | 6.94277076993923 | 4.65771401199358  | 1.57583446566480  |
| H  | 7.27123426955921 | 3.63102998822112  | 1.46623819542919  |
| C  | 7.72189629259912 | 5.56259005744364  | 2.22654994227127  |
| H  | 8.67952221610763 | 5.26548593381424  | 2.63723433839945  |
| C  | 7.30163331121540 | 6.92288234566548  | 2.39601521807384  |
| C  | 8.04861440314565 | 7.90630554062233  | 3.05549635697267  |
| H  | 9.01466452843772 | 7.66031201502489  | 3.47917840503321  |
| C  | 7.53809384307778 | 9.19811492003762  | 3.15041732780568  |
| H  | 8.09660431714656 | 9.98434614942680  | 3.64009989850420  |

|   |                   |                   |                   |
|---|-------------------|-------------------|-------------------|
| C | 6.28807775377261  | 9.48710200278918  | 2.61767891910312  |
| C | 5.26143771102523  | 6.37397263794835  | 1.15293151414232  |
| C | 6.04857299005118  | 7.30060559411209  | 1.86345053221567  |
| C | 2.47972483445668  | 8.85667081953060  | -1.65151975990799 |
| C | 1.63090235279226  | 9.43269480113177  | -2.58832562539617 |
| H | 1.58193912626104  | 9.01210413577116  | -3.58362216993622 |
| C | 0.85324689243772  | 10.53147583210257 | -2.23298099631864 |
| H | 0.17449615978913  | 10.98321974331273 | -2.94606762061881 |
| C | 0.96335886630540  | 11.05729637600613 | -0.94011075452392 |
| C | 0.22442586062946  | 12.18783813845905 | -0.45910114329758 |
| H | -0.47206279971614 | 12.67184020238268 | -1.13336925428376 |
| C | 0.37963087068807  | 12.64482916914985 | 0.81231731470196  |
| H | -0.19482359508316 | 13.49399677690888 | 1.16285144272395  |
| C | 1.30589300990365  | 12.03006241216526 | 1.71765030337726  |
| C | 1.52107207644770  | 12.44845801550628 | 3.03639834375591  |
| H | 0.96822604494531  | 13.29008614322948 | 3.43545262087283  |
| C | 2.44419511371853  | 11.76566220559379 | 3.82392619762470  |
| H | 2.62288997089243  | 12.05388955370335 | 4.85099559233399  |
| C | 3.15714695323629  | 10.70153955882400 | 3.28618271337267  |
| C | 1.86394954543950  | 10.42799844633290 | -0.05186087343051 |
| C | 2.05611102885845  | 10.92744924682310 | 1.25079011180950  |
| H | 3.09390955885436  | 8.00241288807843  | -1.90613535217375 |
| H | 3.87908120466135  | 10.15630419960291 | 3.88069754486165  |
| H | 2.35237938940757  | 6.36803473393712  | -0.38730812655174 |
| H | 5.87223911051915  | 10.48463304051296 | 2.67962506769299  |

**[2]<sup>2+</sup> - D<sup>ox</sup> (S = 1)**

Eh = -2941.267509927296

|    |                  |                   |                   |
|----|------------------|-------------------|-------------------|
| Cu | 3.81080208108758 | 8.75271149460812  | 1.02539382047211  |
| N  | 3.94009921789056 | 6.75620521048136  | 0.88367367431585  |
| N  | 5.68679183273613 | 8.61262607642444  | 1.70013139646962  |
| N  | 2.77362342342012 | 9.49762691641693  | -0.51167644551542 |
| N  | 2.76085499924761 | 10.08280511105058 | 2.10043302301560  |
| C  | 3.00597114509435 | 5.87113254008780  | 0.52522630254695  |
| C  | 3.29183008917623 | 4.49036411089094  | 0.55316206040174  |
| H  | 2.51602127099857 | 3.79458490766967  | 0.26055363617982  |
| C  | 4.52924264289076 | 4.03830570176988  | 0.94087890752085  |
| H  | 4.74934115433133 | 2.97716638091413  | 0.95052277054526  |
| C  | 5.51660236003964 | 4.96239888857582  | 1.34473172463381  |
| C  | 6.82218692867651 | 4.59272124816152  | 1.78994351525076  |
| H  | 7.08430742774695 | 3.54212494945798  | 1.81445235039148  |
| C  | 7.72252114797146 | 5.53978403891412  | 2.17415439460464  |
| H  | 8.71499474895244 | 5.25520175543927  | 2.50139759999693  |
| C  | 7.37917368282587 | 6.92579873445779  | 2.15542704298771  |
| C  | 8.26196529627375 | 7.96261555321577  | 2.52869818353611  |
| H  | 9.26415635197013 | 7.72156125107483  | 2.86351231085601  |
| C  | 7.84766921243047 | 9.26889157333545  | 2.45223581378019  |
| H  | 8.51742103245643 | 10.07770164423207 | 2.71529528440463  |
| C  | 6.53906331550803 | 9.58616696775606  | 2.03073716444942  |
| C  | 5.16250237545384 | 6.32289640241003  | 1.30779446523291  |
| C  | 6.09439020686428 | 7.31010244019385  | 1.73343683795863  |
| C  | 1.65955941872157 | 6.35869076847836  | 0.09162511138040  |
| H  | 1.46380209324453 | 7.36574559610862  | 0.45647394653433  |
| H  | 0.88154782171652 | 5.69024805608003  | 0.46167836005117  |
| H  | 1.58930281616274 | 6.36472274231741  | -0.99997226823204 |
| C  | 6.10740627793626 | 11.01393523238402 | 1.92332254114960  |
| H  | 5.05801951159774 | 11.09755010253849 | 1.64747816400500  |

|   |                   |                   |                   |
|---|-------------------|-------------------|-------------------|
| H | 6.70827144510071  | 11.52035299515167 | 1.16297987486399  |
| H | 6.27422889711423  | 11.54121621442970 | 2.86506050998667  |
| C | 2.87266161544764  | 9.21158571137424  | -1.81221577736579 |
| C | 2.05810428894027  | 9.88280693576080  | -2.74881241918103 |
| H | 2.15797094919114  | 9.63067281652848  | -3.79684435556790 |
| C | 1.156272911111370 | 10.83268501402021 | -2.33877754231065 |
| H | 0.52303624315395  | 11.33796468179432 | -3.05871961656091 |
| C | 1.06207724362329  | 11.16340474563217 | -0.96933886167856 |
| C | 0.17705504921055  | 12.15489828233630 | -0.44681108818740 |
| H | -0.47299507452869 | 12.68436848888977 | -1.13250169469962 |
| C | 0.14832973925006  | 12.43117496976422 | 0.88664987651004  |
| H | -0.53036348294006 | 13.17825273385080 | 1.27947387382760  |
| C | 1.01205574596365  | 11.74652917289778 | 1.79461128362522  |
| C | 1.03305035958287  | 11.9740907778368  | 3.18740233666041  |
| H | 0.37124800583800  | 12.71419789733688 | 3.62196801156945  |
| C | 1.88254229462582  | 11.24515918163581 | 3.98281792460906  |
| H | 1.89746253508026  | 11.39200313526677 | 5.05512666471846  |
| C | 2.75602435078545  | 10.29144632509320 | 3.42003213565947  |
| C | 1.90987964539997  | 10.46723045637963 | -0.09028522271203 |
| C | 1.89772329291751  | 10.77254613475412 | 1.29928915297952  |
| C | 3.87035321950282  | 8.19683410995991  | -2.27215818666861 |
| H | 4.38353583401256  | 7.72828949780836  | -1.43467950576169 |
| H | 4.61493729326184  | 8.67976032798206  | -2.91073809826355 |
| H | 3.38699042103058  | 7.42437071786624  | -2.87438639983657 |
| C | 3.68656911713023  | 9.50851337478461  | 4.29163101027172  |
| H | 4.02519646125763  | 8.59920785297405  | 3.79768892839755  |
| H | 3.18960114949372  | 9.24054981033882  | 5.22458972696069  |
| H | 4.56237356601734  | 10.10983624215874 | 4.55228276923024  |

[2]<sup>0</sup> - D<sup>red</sup> (S = 1)

Eh = -2941.733122685201

|    |                  |                   |                   |
|----|------------------|-------------------|-------------------|
| Cu | 3.78800402388567 | 8.73574423727180  | 1.04516300225897  |
| N  | 3.89313620135679 | 6.72461079646885  | 1.18473349787216  |
| N  | 5.77388559823442 | 8.61080753647105  | 1.37874298450253  |
| N  | 2.97571920346925 | 9.75216630096721  | -0.49597039963168 |
| N  | 2.48727061806780 | 9.83713601060910  | 2.12978744308121  |
| C  | 2.91661639384662 | 5.80942051173170  | 1.12680255024754  |
| C  | 3.17405106094442 | 4.44665696279114  | 1.30497676654213  |
| H  | 2.35557066403900 | 3.74079472725333  | 1.23808017074791  |
| C  | 4.47378347024902 | 4.00822529249687  | 1.54383300570081  |
| H  | 4.68854255051342 | 2.95310482466813  | 1.67156013016058  |
| C  | 5.51095877705443 | 4.94348781799501  | 1.61477097992393  |
| C  | 6.88435086984744 | 4.60301458167825  | 1.83920367957994  |
| H  | 7.14092680727761 | 3.55721881242360  | 1.97050208046887  |
| C  | 7.85083005181124 | 5.55880597813795  | 1.87874590297836  |
| H  | 8.88765594962249 | 5.28446202988858  | 2.04146096035542  |
| C  | 7.53151900538250 | 6.94619814583820  | 1.71812844632069  |
| C  | 8.47448486517547 | 7.97763148793577  | 1.76871314492731  |
| H  | 9.52123429115024 | 7.74490075891297  | 1.92948240143450  |
| C  | 8.05334775800997 | 9.29579716969439  | 1.61563186860825  |
| H  | 8.76383352633563 | 10.11192262891108 | 1.65802169480735  |
| C  | 6.69756692095584 | 9.58000808176304  | 1.42527264341147  |
| C  | 5.17501788674301 | 6.30879144007923  | 1.43792911726008  |
| C  | 6.17713302035718 | 7.30648767459583  | 1.50873176888338  |
| C  | 1.53910565135549 | 6.33115085112521  | 0.84814363158541  |
| H  | 1.52161547675623 | 6.85447601677847  | -0.11179432334175 |
| H  | 1.25505966366518 | 7.06446952207368  | 1.60820277076599  |

|   |                   |                   |                   |
|---|-------------------|-------------------|-------------------|
| H | 0.80349799129566  | 5.52652274003221  | 0.83049987477071  |
| C | 6.18949272758135  | 10.98273267973780 | 1.27844283721246  |
| H | 5.61477097929707  | 11.07795147403440 | 0.35311228113995  |
| H | 7.00625249043078  | 11.70507465595688 | 1.27346131487115  |
| H | 5.50520472655359  | 11.22242465695881 | 2.09718785775733  |
| C | 3.28091355888988  | 9.71793785043658  | -1.80001654638624 |
| C | 2.64507573769486  | 10.54991409662870 | -2.72648598842522 |
| H | 2.91597862902935  | 10.48040788731639 | -3.77262813949465 |
| C | 1.66043973057948  | 11.43874839075189 | -2.30380649922834 |
| H | 1.15042176543795  | 12.08036617711731 | -3.01370057819444 |
| C | 1.32554785616864  | 11.49721132149226 | -0.94735906822474 |
| C | 0.31705516169031  | 12.35964671095465 | -0.40718950388232 |
| H | -0.21708017483324 | 13.01578863828730 | -1.08610955068117 |
| C | 0.02216108128489  | 12.35519038031895 | 0.92026705682409  |
| H | -0.75078142472248 | 13.00686462529577 | 1.31345808862743  |
| C | 0.72419833970178  | 11.50483594027783 | 1.83485194569165  |
| C | 0.48216376155579  | 11.46680088278011 | 3.21167019861959  |
| H | -0.28453160092508 | 12.10076851201011 | 3.64293107648205  |
| C | 1.23577573982305  | 10.61430716196285 | 4.01400354072979  |
| H | 1.07128971083896  | 10.57214181925601 | 5.08347858023854  |
| C | 2.23283504063424  | 9.81616908258902  | 3.44474782266688  |
| C | 2.02152152658294  | 10.63662719986705 | -0.06264783925547 |
| C | 1.73808196088841  | 10.65618788252486 | 1.32454442591768  |
| C | 4.32759084761536  | 8.72513536707702  | -2.20692622083104 |
| H | 5.23986457291693  | 8.88171590915069  | -1.62485242008163 |
| H | 4.55812744006991  | 8.80086656771314  | -3.26994466065158 |
| H | 3.98719725756773  | 7.70937139410489  | -1.98679102702908 |
| C | 3.09026958713820  | 8.90326555563494  | 4.26867547200013  |
| H | 3.04601191890832  | 7.88598182115535  | 3.87010067087155  |
| H | 2.77824067677930  | 8.89742908224849  | 5.31346852668797  |
| H | 4.13655507741938  | 9.21645833776655  | 4.21075755180559  |

**[2]<sup>+</sup> - s<sub>0</sub> (s = 0)**

Eh = -2941.596778167522

|    |                  |                   |                   |
|----|------------------|-------------------|-------------------|
| Cu | 3.78618454890123 | 8.73585660105153  | 1.04731521051368  |
| N  | 3.90208830350401 | 6.71293562409774  | 1.14666985784901  |
| N  | 5.77051366583172 | 8.60757917889728  | 1.42773688549201  |
| N  | 2.93747318909698 | 9.71983662178366  | -0.50551149761289 |
| N  | 2.51820235163825 | 9.88479643309250  | 2.13183007265793  |
| C  | 2.93897002448102 | 5.80234039852265  | 0.99266436014885  |
| C  | 3.22163291603248 | 4.42617167281352  | 1.08106976936983  |
| H  | 2.41753091721533 | 3.71387792414380  | 0.94693449633693  |
| C  | 4.50371620891892 | 3.99648761256305  | 1.33593946656115  |
| H  | 4.72920821590576 | 2.93867811183040  | 1.40622107813399  |
| C  | 5.53217345212608 | 4.94307229466558  | 1.50539820872106  |
| C  | 6.89322818655512 | 4.59863387087893  | 1.77690167490185  |
| H  | 7.15591026759622 | 3.55045418760451  | 1.85753455909744  |
| C  | 7.84020775072834 | 5.56230839483152  | 1.93492765394145  |
| H  | 8.86902633523459 | 5.29405348315720  | 2.14407069085880  |
| C  | 7.50339469802812 | 6.94810679234998  | 1.82957399235715  |
| C  | 8.43382233462425 | 7.99409533484321  | 1.98220890448810  |
| H  | 9.47170195866288 | 7.76408341012422  | 2.19348668683608  |
| C  | 8.01411482936983 | 9.29850817168598  | 1.85841839058556  |
| H  | 8.71406546832835 | 10.11661126127968 | 1.97143419710610  |
| C  | 6.66504624075284 | 9.58620513960763  | 1.57731066036037  |
| C  | 5.17232354246481 | 6.30137613485387  | 1.39699114861763  |
| C  | 6.17098448008398 | 7.31546519533337  | 1.55496811549100  |

|   |                   |                   |                   |
|---|-------------------|-------------------|-------------------|
| C | 1.55269921992770  | 6.31129153254078  | 0.74382195201032  |
| H | 1.58199854666270  | 7.15393364825448  | 0.05041075929922  |
| H | 1.11323238509955  | 6.67393499856875  | 1.67819433147591  |
| H | 0.90699883837139  | 5.53006632581853  | 0.34375387830118  |
| C | 6.16458195448441  | 10.99230998791791 | 1.45285719591114  |
| H | 5.41201923519863  | 11.05269485997092 | 0.66467857965545  |
| H | 6.97574101969568  | 11.68847831220434 | 1.24162985454834  |
| H | 5.68465310773669  | 11.30175595700331 | 2.38682338814794  |
| C | 3.17522710911352  | 9.59735382686603  | -1.81301809097239 |
| C | 2.46689416369544  | 10.36927566331380 | -2.75315500436479 |
| H | 2.68701017568424  | 10.24872709815800 | -3.80624788281499 |
| C | 1.51103880037069  | 11.26619723855547 | -2.33473974129309 |
| H | 0.96395179781530  | 11.86648855954178 | -3.05245695957991 |
| C | 1.24526976187601  | 11.40684847525125 | -0.95906840366312 |
| C | 0.27644741666032  | 12.31277067452105 | -0.42448365757866 |
| H | -0.29136293494127 | 12.92869213599229 | -1.11181270808087 |
| C | 0.06919618265059  | 12.40325932026658 | 0.91685733577659  |
| H | -0.66678490320350 | 13.09178505806667 | 1.31485264956896  |
| C | 0.81366738147587  | 11.59501527730916 | 1.83204368221623  |
| C | 0.64647266193869  | 11.63694697246826 | 3.22946954628195  |
| H | -0.08149400373469 | 12.31191663888509 | 3.66449742476287  |
| C | 1.40887057678475  | 10.81602769944385 | 4.02851261588559  |
| H | 1.29347337510009  | 10.83258668941676 | 5.10480659649270  |
| C | 2.34905964122456  | 9.93978343575043  | 3.45406825630356  |
| C | 1.99366637588453  | 10.59959467638471 | -0.07961783889828 |
| C | 1.77412329207595  | 10.69257322178665 | 1.33249347422450  |
| C | 4.20752686467099  | 8.59511128912120  | -2.22793255636020 |
| H | 5.04029643521741  | 8.60160763552799  | -1.52216130799645 |
| H | 4.57643458122570  | 8.79605193372133  | -3.23341662574851 |
| H | 3.77771831972472  | 7.58853912860645  | -2.21713532141879 |
| C | 3.21364785873200  | 9.04693847061062  | 4.28976702933290  |
| H | 3.31486723296830  | 8.06978047771496  | 3.81341544613296  |
| H | 2.80887077200594  | 8.92504045306826  | 5.29405513411201  |
| H | 4.21854137172579  | 9.47235397735990  | 4.37493688551659  |

**[2]<sup>+</sup> - T<sub>1</sub> (S = 2)**

Eh = -2941.531222730112

|    |                  |                   |                   |
|----|------------------|-------------------|-------------------|
| Cu | 3.72837184780810 | 8.68285311692400  | 1.03848244713727  |
| N  | 3.95178602036164 | 6.71404975653980  | 0.83980603682475  |
| N  | 5.57717197780329 | 8.61077775889166  | 1.75115056975760  |
| N  | 2.70675344580674 | 9.43967878100309  | -0.49385232282740 |
| N  | 2.76832150065678 | 10.05330007861354 | 2.08861393373038  |
| C  | 3.05969641407816 | 5.78097568329631  | 0.47097118070620  |
| C  | 3.40576620489335 | 4.42362345672229  | 0.46445139208396  |
| H  | 2.66451211104906 | 3.70196682433628  | 0.14641999255900  |
| C  | 4.67006011988421 | 4.01267688619047  | 0.85184893531401  |
| H  | 4.94068952672994 | 2.96389008597334  | 0.82941622797573  |
| C  | 5.60050331505697 | 4.96599956165295  | 1.28827245435072  |
| C  | 6.92374432125921 | 4.65446107219251  | 1.73213802057667  |
| H  | 7.23693203044218 | 3.61731115738429  | 1.73325123389835  |
| C  | 7.77681893844847 | 5.63398927122172  | 2.13716153902152  |
| H  | 8.78170117096989 | 5.38863827921196  | 2.45943906310586  |
| C  | 7.37293766680035 | 7.00673976414285  | 2.15353450905233  |
| C  | 8.19802084968930 | 8.06860002318182  | 2.54997619181167  |
| H  | 9.21118195008156 | 7.87316707890310  | 2.87949854958180  |
| C  | 7.71134462439775 | 9.36700092791657  | 2.49139963255137  |
| H  | 8.34280052848083 | 10.20323519301061 | 2.76142793787135  |

|   |                   |                   |                   |
|---|-------------------|-------------------|-------------------|
| C | 6.39894985345342  | 9.62474026372616  | 2.08736616012454  |
| C | 5.19186512043562  | 6.31720265746056  | 1.28200841875746  |
| C | 6.06243257080283  | 7.32789263648225  | 1.73945945300316  |
| C | 1.66998554014212  | 6.21128076317161  | 0.11085732931377  |
| H | 1.61654900836625  | 7.28425997640028  | -0.05906180938841 |
| H | 0.98921302601007  | 5.96173946326682  | 0.93051245854655  |
| H | 1.31524904883472  | 5.68551190016665  | -0.77697499119820 |
| C | 5.87936810537353  | 11.02743431844318 | 1.99680366159288  |
| H | 5.28690139720815  | 11.15665017526135 | 1.08860578817503  |
| H | 6.70675762054445  | 11.73550429892510 | 1.98454978053882  |
| H | 5.23447788686925  | 11.27668026836046 | 2.84293669737888  |
| C | 2.79715725579361  | 9.16119310180169  | -1.80852698438265 |
| C | 2.09011030950379  | 9.91750557936525  | -2.74666059258128 |
| H | 2.18477798932187  | 9.66238829456155  | -3.79393427781369 |
| C | 1.27128786800872  | 10.96469877791032 | -2.34626899090342 |
| H | 0.70886478337926  | 11.53491513454162 | -3.07562007006586 |
| C | 1.18898991015988  | 11.29173311530049 | -0.98682738859937 |
| C | 0.39696524726136  | 12.36118801377479 | -0.45944480435840 |
| H | -0.18837296549125 | 12.95754397807200 | -1.14911623405625 |
| C | 0.36765093262338  | 12.62368374564517 | 0.87511492651572  |
| H | -0.24694767730899 | 13.42703752197436 | 1.26336214463528  |
| C | 1.15006730180723  | 11.85765231664643 | 1.79697345214412  |
| C | 1.17554455079073  | 12.06809200251076 | 3.18179488466573  |
| H | 0.57766144879920  | 12.85754104230309 | 3.62078675218019  |
| C | 1.95712602685069  | 11.24534532485942 | 3.98278675787447  |
| H | 1.96724357169313  | 11.37371444816929 | 5.05718925652225  |
| C | 2.75012952996478  | 10.24131111594792 | 3.42183084899138  |
| C | 1.94653746527150  | 10.51087148128748 | -0.08715250938446 |
| C | 1.95371810636341  | 10.81432351769180 | 1.28843183215330  |
| C | 3.66467583886638  | 8.01710321979556  | -2.23370524401225 |
| H | 4.58247981660525  | 7.98641055769756  | -1.64353407328420 |
| H | 3.92100282563246  | 8.10623126114775  | -3.28844100619021 |
| H | 3.15131981755502  | 7.06247790296020  | -2.09200992139227 |
| C | 3.58984902820098  | 9.34399002779466  | 4.27966810172196  |
| H | 3.53816380832462  | 8.31294533549559  | 3.92303179760474  |
| H | 3.24702373562361  | 9.37967797470945  | 5.31283767584094  |
| H | 4.64147273166096  | 9.64092872906172  | 4.26302019424653  |

**[3]<sup>2+</sup> - D<sup>∞</sup> (S = 1)**

|      |                    |                   |                   |
|------|--------------------|-------------------|-------------------|
| Eh = | -3255.953713460561 |                   |                   |
| Cu   | 11.04978771268972  | 10.50752280136921 | -4.45181175351290 |
| N    | 11.01473717704224  | 9.19344266196451  | -5.98302854596127 |
| N    | 11.85044876572113  | 10.53286678493032 | -2.60359253513027 |
| N    | 12.17448006397843  | 11.58872806787998 | -5.69472329114938 |
| N    | 9.31480093251088   | 10.65012247524471 | -3.46481492240837 |
| C    | 10.47225305298078  | 7.97356988977875  | -6.04164827814798 |
| C    | 10.69248439422510  | 7.15787023786114  | -7.17246803655998 |
| C    | 11.44754622770624  | 7.60600156079482  | -8.22710351489270 |
| C    | 12.03767501943875  | 8.88725010759732  | -8.16966581964557 |
| C    | 12.85213861609518  | 9.43983562303575  | -9.20477540647028 |
| C    | 13.39915051199552  | 10.68115076900807 | -9.07776832869498 |
| C    | 13.18754879297221  | 11.45472904335608 | -7.89660038953198 |
| C    | 13.71331655531714  | 12.74898286144811 | -7.69087752753693 |
| C    | 13.12930562534802  | 10.39144397214628 | -2.23272354462280 |
| C    | 13.46371976843893  | 10.39641086902767 | -0.86472815535023 |
| C    | 12.49372089073904  | 10.55093960051994 | 0.09737119442282  |
| C    | 11.14304489763971  | 10.67585360290428 | -0.28311818517756 |



|   |                   |                   |                    |
|---|-------------------|-------------------|--------------------|
| C | 10.06153288651772 | 10.82402857566832 | 0.63965549701939   |
| C | 8.77892174083420  | 10.93616847100479 | 0.19899440707981   |
| C | 8.47809327032969  | 10.88906993572317 | -1.19767952199231  |
| C | 7.17816216162726  | 11.00093511125317 | -1.73019135642398  |
| C | 13.43147142713494 | 13.42395334074572 | -6.52878901610677  |
| C | 12.64888140596529 | 12.82509708158153 | -5.51939235470680  |
| C | 12.40259549367485 | 10.92036056727409 | -6.86009746849224  |
| C | 11.80162495442828 | 9.63932662366566  | -7.00570937800050  |
| C | 9.65911775025482  | 7.48025141514304  | -4.87410937830396  |
| C | 8.30823110260911  | 6.89873620016498  | -5.31161385484686  |
| C | 10.46887883299412 | 6.44689682542244  | -4.06951278571429  |
| C | 12.29826933022653 | 13.56315487075069 | -4.25461576536851  |
| C | 11.37987471918469 | 14.75503940098585 | -4.57871689096915  |
| C | 13.54446866094244 | 14.02102363747636 | -3.48599001477703  |
| C | 6.98895057881698  | 10.95829091334923 | -3.09191853191826  |
| C | 8.07891780749036  | 10.77665886620552 | -3.96408013671937  |
| C | 9.52594748269866  | 10.72777627014001 | -2.12250915398245  |
| C | 10.87227805439843 | 10.64413806506714 | -1.66351698855205  |
| C | 14.15939195978580 | 10.17697424657342 | -3.31519426059572  |
| C | 14.02462084314647 | 8.74569015517819  | -3.86845687713362  |
| C | 15.59525528169663 | 10.45579176585139 | -2.87048882304552  |
| C | 7.92951796623998  | 10.76282972938263 | -5.46518742220767  |
| C | 6.50804067253954  | 10.47010703208636 | -5.94373901708025  |
| C | 8.44113827819734  | 12.09868516267636 | -6.03739118762540  |
| H | 10.24549503349104 | 6.17336106476148  | -7.19774145021584  |
| H | 11.59950727901365 | 6.98243494323770  | -9.10045565315711  |
| H | 13.02466100360636 | 8.85209825366770  | -10.09809868889917 |
| H | 14.00567548979370 | 11.09894624591369 | -9.87194395807093  |
| H | 14.32779667779459 | 13.20670342427700 | -8.45743190234785  |
| H | 14.50014337046213 | 10.28762367522354 | -0.57912657174422  |
| H | 12.76125477785199 | 10.57106983789421 | 1.14754068147056   |
| H | 10.28413368154466 | 10.84897204873772 | 1.69933875966421   |
| H | 7.96366884135050  | 11.05952986907300 | 0.90131387606902   |
| H | 6.33307538579732  | 11.12532964545105 | -1.06297164324500  |
| H | 13.81176742513519 | 14.42410112113358 | -6.36953306951797  |
| H | 9.47765317267602  | 8.34370045260385  | -4.22994906631719  |
| H | 11.74005375952503 | 12.86276603725524 | -3.62614377786690  |
| H | 8.43664669060019  | 5.96618567548084  | -5.86394071817391  |
| H | 7.70660355992080  | 6.67517197103069  | -4.42935557251939  |
| H | 7.75135835030418  | 7.59365723226736  | -5.94218272294083  |
| H | 11.40611886650467 | 6.86798676649774  | -3.70102049566199  |
| H | 9.88154148883278  | 6.11188713140356  | -3.21292213847612  |
| H | 10.70357191576858 | 5.57250350839662  | -4.67981857829867  |
| H | 10.48046546414926 | 14.43720034518312 | -5.10848758656142  |
| H | 11.08031277627078 | 15.24506058708184 | -3.65087843130139  |
| H | 11.89739835525495 | 15.49250796759656 | -5.19507094423041  |
| H | 14.11561751291745 | 14.75590840527555 | -4.05670420129200  |
| H | 13.24178405161996 | 14.49363242031688 | -2.55031101159550  |
| H | 14.20521179784243 | 13.18550381724688 | -3.25135508961787  |
| H | 5.99602629070507  | 11.05412811767516 | -3.50728857240503  |
| H | 13.90659050095689 | 10.86734393992252 | -4.12302435036875  |
| H | 8.59333835887866  | 9.97482166832689  | -5.83224335076592  |
| H | 14.26831121252832 | 8.00844715592548  | -3.10084458152604  |
| H | 14.71049061781051 | 8.60720531064346  | -4.70571033073852  |
| H | 13.00873777556857 | 8.55064878181915  | -4.21946785091256  |
| H | 15.70329001271184 | 11.44949658256307 | -2.43115459867482  |
| H | 16.25826712274715 | 10.39601117340137 | -3.73447815081584  |

|   |                   |                   |                   |
|---|-------------------|-------------------|-------------------|
| H | 15.94255813884339 | 9.71681370662421  | -2.14521447031292 |
| H | 6.11209201766599  | 9.55008383384573  | -5.50943446040798 |
| H | 6.50773068995193  | 10.35944174129996 | -7.02880553978065 |
| H | 5.82720425154797  | 11.28921463560529 | -5.70238351635708 |
| H | 7.83121451186692  | 12.93222359611297 | -5.68360363857899 |
| H | 9.47715589591303  | 12.28260936448345 | -5.74114633010747 |
| H | 8.39478925370097  | 12.07640661550534 | -7.12717442556508 |

[3]<sup>0</sup> - D<sup>red</sup> (S = 1)

Eh = -3256.410297100027

|    |                   |                   |                    |
|----|-------------------|-------------------|--------------------|
| Cu | 11.12267716738514 | 10.59140608292402 | -4.43362807007211  |
| N  | 11.07772944971944 | 9.14153417303451  | -5.87121694125594  |
| N  | 11.82195483687301 | 10.33682385431059 | -2.55135405462996  |
| N  | 12.13627305774216 | 11.60826344812728 | -5.83572286432567  |
| N  | 9.37549402732476  | 10.92397916176942 | -3.48015361440793  |
| C  | 10.45549669840250 | 7.95309776332861  | -5.88764433373321  |
| C  | 10.48044021008481 | 7.13209061135700  | -7.01912660243760  |
| C  | 11.16605909268819 | 7.53605970338965  | -8.16069616177016  |
| C  | 11.80006908525784 | 8.78140730222023  | -8.17765311959118  |
| C  | 12.52825909404786 | 9.29296985868344  | -9.29977715771442  |
| C  | 13.13314272633088 | 10.50953592562708 | -9.25200590301482  |
| C  | 13.04279593669946 | 11.33823428172987 | -8.08698731130235  |
| C  | 13.62709375199230 | 12.60393890863183 | -7.98124771537136  |
| C  | 13.07590202621957 | 10.16567177729523 | -2.10562951685318  |
| C  | 13.34253620715681 | 9.93717159381254  | -0.75287004933795  |
| C  | 12.29765318274508 | 9.88196834308659  | 0.16592385832320   |
| C  | 10.98674926761683 | 10.09990528446135 | -0.26825994570270  |
| C  | 9.84189333420086  | 10.07651767696065 | 0.59226015218698   |
| C  | 8.58953069183450  | 10.29239495177206 | 0.10760413095160   |
| C  | 8.36995753828208  | 10.57764490020817 | -1.27801781712851  |
| C  | 7.11191413389325  | 10.83113558082758 | -1.83479562485694  |
| C  | 13.47014693555272 | 13.33635751259543 | -6.80737157012713  |
| C  | 12.71409207909281 | 12.81661353981164 | -5.75399974562454  |
| C  | 12.31063231495373 | 10.85969275556173 | -6.97159800593445  |
| C  | 11.71722142193871 | 9.57332400688975  | -7.00460947991151  |
| C  | 9.75998744474548  | 7.55800124446705  | -4.60407718027390  |
| C  | 8.62431724946831  | 6.55461676106082  | -4.80318939522140  |
| C  | 10.77653495596828 | 7.03995327423865  | -3.57559166535608  |
| C  | 12.44615553822686 | 13.57137036740781 | -4.47292448679965  |
| C  | 11.03812314923742 | 14.18522382929777 | -4.51571664947057  |
| C  | 13.50591920883823 | 14.61938100574004 | -4.13741303408350  |
| C  | 7.01021422217454  | 11.11903449501607 | -3.19142257838037  |
| C  | 8.16028520807545  | 11.16425390474023 | -3.98828619284638  |
| C  | 9.49049036451745  | 10.61913361361306 | -2.14455024194498  |
| C  | 10.78912853624647 | 10.35003446596321 | -1.64925941637031  |
| C  | 14.15646020753024 | 10.21797951070972 | -3.16251415374659  |
| C  | 14.23234863226893 | 8.89303751640301  | -3.93626732552508  |
| C  | 15.52659911559586 | 10.61905635146253 | -2.61661419242569  |
| C  | 8.09918751289157  | 11.48177723576516 | -5.46427316034158  |
| C  | 7.49102411816479  | 10.31519464649296 | -6.25499900845047  |
| C  | 7.34678451027088  | 12.78744382306502 | -5.74495896448836  |
| H  | 9.97867697246301  | 6.17430227967635  | -6.99485940132790  |
| H  | 11.20702548135147 | 6.89801731468978  | -9.03650703903529  |
| H  | 12.59381594287935 | 8.68145161035048  | -10.19330341576632 |
| H  | 13.69023862064296 | 10.88003383549610 | -10.10577513672302 |
| H  | 14.19707634043278 | 13.00555473954375 | -8.81161138722368  |
| H  | 14.36296984652831 | 9.78843366531710  | -0.42673686354828  |

|   |                   |                   |                   |
|---|-------------------|-------------------|-------------------|
| H | 12.49286549425944 | 9.68290619751273  | 1.21377922748710  |
| H | 9.99459707717706  | 9.87411394198291  | 1.64694790153915  |
| H | 7.73132778260419  | 10.26180502184865 | 0.77029587464593  |
| H | 6.22931539845643  | 10.80742976495563 | -1.20533307538094 |
| H | 13.91843631912540 | 14.31589977458919 | -6.71120716488538 |
| H | 9.34167690999499  | 8.48666784993033  | -4.20435116477939 |
| H | 12.43655972889667 | 12.81190463272614 | -3.68196133616112 |
| H | 9.00210293818599  | 5.57366365994031  | -5.10508185670974 |
| H | 8.08417596110702  | 6.42225716228377  | -3.86308889052557 |
| H | 7.91273228760359  | 6.89423380833360  | -5.55949118849990 |
| H | 11.54225782265982 | 7.79043831661065  | -3.38261233148937 |
| H | 10.27427506126310 | 6.81710406073159  | -2.63079519082048 |
| H | 11.25944262946048 | 6.12738832934832  | -3.93564658468980 |
| H | 10.29818968700772 | 13.40615545273920 | -4.70212098158866 |
| H | 10.80138776902179 | 14.65971964873723 | -3.56012066469995 |
| H | 10.96760904923040 | 14.93803103731631 | -5.30563839207726 |
| H | 13.49318825804640 | 15.44932555511490 | -4.84942109006133 |
| H | 13.31202510852944 | 15.03583964830037 | -3.14641111916364 |
| H | 14.50926287914286 | 14.18644913319940 | -4.13469314401492 |
| H | 6.04669664214398  | 11.32934630418803 | -3.63807032538963 |
| H | 13.82588046679609 | 10.98092856390274 | -3.87491201171400 |
| H | 9.14089934886805  | 11.59748853457478 | -5.78223722836553 |
| H | 14.49180604586610 | 8.06705133098342  | -3.26837270725830 |
| H | 14.99405048800192 | 8.95883049613091  | -4.71739093018515 |
| H | 13.27645635250880 | 8.67378247449717  | -4.41365530136289 |
| H | 15.47395921442800 | 11.54760488079512 | -2.04309120724060 |
| H | 16.22194130438305 | 10.76822122504001 | -3.44575935777777 |
| H | 15.94785924446814 | 9.84197953651223  | -1.97269601754365 |
| H | 8.06028620103746  | 9.39911359642098  | -6.09690341595215 |
| H | 7.50035951829407  | 10.54036444555917 | -7.32446226511466 |
| H | 6.45568178327459  | 10.13593490334950 | -5.95200734918460 |
| H | 6.29125250692478  | 12.70409925881409 | -5.47263494826583 |
| H | 7.77691420656639  | 13.62050537861974 | -5.18523303836700 |
| H | 7.39801406810949  | 13.02632258547558 | -6.81016337141072 |

[31]<sup>+</sup> - S<sub>0</sub> (S = 0)

Eh = -3256.276981225595

|    |                   |                   |                   |
|----|-------------------|-------------------|-------------------|
| Cu | 10.99894055510957 | 10.66679969901128 | -4.47238699569218 |
| N  | 11.15354762985591 | 9.13724778697425  | -5.82268766019227 |
| N  | 11.76800462096623 | 10.23891855462427 | -2.62853859408212 |
| N  | 11.94121802221263 | 11.69587666006423 | -5.92797506195134 |
| N  | 9.32527829134949  | 11.01890652980959 | -3.39971818629962 |
| C  | 10.74082456459764 | 7.87358045463989  | -5.72213422186023 |
| C  | 11.06717066601166 | 6.92815695816555  | -6.71484320822662 |
| C  | 11.80499344858110 | 7.30054052626665  | -7.81352481750577 |
| C  | 12.23384042126370 | 8.63678610652045  | -7.94344836630298 |
| C  | 12.99197701955989 | 9.12654489993159  | -9.05162769042927 |
| C  | 13.37383684763396 | 10.43137012280715 | -9.11571286412630 |
| C  | 13.03318245684901 | 11.34868520683413 | -8.07362476263226 |
| C  | 13.40086660630412 | 12.70959405620627 | -8.07462093077064 |
| C  | 13.00248857644088 | 9.86497778572815  | -2.29360704209066 |
| C  | 13.28968365098488 | 9.41653800033350  | -0.98853202158149 |
| C  | 12.30114969724412 | 9.37646380266842  | -0.03405372001137 |
| C  | 10.99591387912488 | 9.79145221086944  | -0.36603953508480 |
| C  | 9.90381992305340  | 9.80474495638220  | 0.55625663279229  |
| C  | 8.66680559411095  | 10.21955108298678 | 0.16905762348465  |
| C  | 8.42142192329078  | 10.64843743517157 | -1.17256573536694 |

|   |                   |                   |                   |
|---|-------------------|-------------------|-------------------|
| C | 7.16611582172437  | 11.08408780601811 | -1.64140610649930 |
| C | 13.03251642264556 | 13.51252599742845 | -7.02155185005676 |
| C | 12.29703992715266 | 12.98097293239793 | -5.94367221472463 |
| C | 12.29183034100656 | 10.89059695245631 | -6.96739909204168 |
| C | 11.88058515952798 | 9.52050352976435  | -6.90456307901616 |
| C | 9.92923457162354  | 7.50683085935677  | -4.50397669404242 |
| C | 8.64872864475112  | 6.74485879960548  | -4.86502562677851 |
| C | 10.77803709977361 | 6.71003958905208  | -3.50169077481538 |
| C | 11.89043902436810 | 13.82111211926969 | -4.76008185931044 |
| C | 11.01776306213272 | 15.00971616891046 | -5.18277441976395 |
| C | 13.11958194052499 | 14.28111080259027 | -3.96424861957137 |
| C | 7.02884542742023  | 11.47703027191098 | -2.95227358752457 |
| C | 8.13257711884395  | 11.43770524902650 | -3.82626039925165 |
| C | 9.47881458421231  | 10.63951668671188 | -2.10301931363392 |
| C | 10.78287032736476 | 10.21248809671765 | -1.69327568166735 |
| C | 14.06102695067414 | 9.93800480179795  | -3.36613506910777 |
| C | 14.40069496215254 | 8.53946722361075  | -3.90294066432481 |
| C | 15.32204385118493 | 10.66248872708860 | -2.88017902073738 |
| C | 8.03473153118556  | 11.82001166684201 | -5.28161482154144 |
| C | 7.56883525401344  | 10.61241934792821 | -6.11164105410215 |
| C | 7.14784543521427  | 13.04335802746990 | -5.52519619744179 |
| H | 10.72552209627533 | 5.90696922943570  | -6.60590729119467 |
| H | 12.05582014698472 | 6.57859306349533  | -8.58218886217749 |
| H | 13.25702551364712 | 8.43645219735766  | -9.84395506520139 |
| H | 13.94682389580771 | 10.79587780704299 | -9.96011134018602 |
| H | 13.97083520661320 | 13.11148822099121 | -8.90436098549755 |
| H | 14.29866555013209 | 9.11008508307906  | -0.74476943829239 |
| H | 12.51694154079784 | 9.03508391128486  | 0.97186305870226  |
| H | 10.08067383833261 | 9.47798557895599  | 1.57418039204592  |
| H | 7.84412885422446  | 10.22858176074868 | 0.87433308719354  |
| H | 6.31908358513341  | 11.10865752419464 | -0.96547547468014 |
| H | 13.30688083822233 | 14.55961382772152 | -7.00929979691443 |
| H | 9.65340441693392  | 8.45758621200652  | -4.03789621385650 |
| H | 11.29610461511844 | 13.15736451192774 | -4.12153176297651 |
| H | 8.87246346525355  | 5.75706459447327  | -5.27464979799482 |
| H | 8.04400102134489  | 6.59911376089253  | -3.96772133762329 |
| H | 8.04940564024980  | 7.28932898444482  | -5.59705969749987 |
| H | 11.65907716131725 | 7.27422468949938  | -3.19411923779054 |
| H | 10.18733015327734 | 6.48436459179433  | -2.61132213123333 |
| H | 11.11041212756755 | 5.76408103679044  | -3.93652624033762 |
| H | 10.13927268148088 | 14.67781116012241 | -5.73969922617756 |
| H | 10.67947605712212 | 15.55436689760713 | -4.29897168521728 |
| H | 11.57475078855241 | 15.70887733769070 | -5.81120586421449 |
| H | 13.74874124648287 | 14.94950468542027 | -4.55735717017753 |
| H | 12.80298600352513 | 14.82321869340946 | -3.07092138975777 |
| H | 13.72623666996601 | 13.42903089071011 | -3.65241847798913 |
| H | 6.07223330976843  | 11.82054304928332 | -3.32287481269843 |
| H | 13.61394896020822 | 10.51704389029682 | -4.17984893687082 |
| H | 9.05973950297768  | 12.05480885534686 | -5.58904245696336 |
| H | 14.80210908663337 | 7.90321307148075  | -3.11012674710922 |
| H | 15.15488580536306 | 8.61581764576669  | -4.68916803906142 |
| H | 13.51923888973003 | 8.05219191721168  | -4.32139726660608 |
| H | 15.08401609154577 | 11.64290916378402 | -2.46282969983990 |
| H | 16.01160980942076 | 10.80251493940353 | -3.71491777607867 |
| H | 15.84583409838898 | 10.08575516661119 | -2.11403529460474 |
| H | 8.25466432848500  | 9.77314137380815  | -5.98786069566830 |
| H | 7.53800649408178  | 10.87681954454079 | -7.17074425776512 |

|   |                  |                   |                   |
|---|------------------|-------------------|-------------------|
| H | 6.56830341455480 | 10.29285159087936 | -5.80981986044787 |
| H | 6.09711144298896 | 12.82824651569697 | -5.31653704449086 |
| H | 7.45392585218906 | 13.88911150416169 | -4.90586475360556 |
| H | 7.21570094725795 | 13.34361802868075 | -6.57255610525733 |

**[3]<sup>+</sup> - T<sub>1</sub> (S = 2)**

Eh = -3256.206586074729

|    |                   |                   |                    |
|----|-------------------|-------------------|--------------------|
| Cu | 11.10204654360671 | 10.49447158303024 | -4.45374619067327  |
| N  | 10.94592736277472 | 9.20556355593125  | -5.97702319774991  |
| N  | 11.85556392668231 | 10.48926111773603 | -2.59534762465304  |
| N  | 12.24651218160514 | 11.52689061224716 | -5.70791497631883  |
| N  | 9.34971586556512  | 10.68108374329010 | -3.51403979046722  |
| C  | 10.30930549947287 | 8.01999101788721  | -6.04579581253045  |
| C  | 10.38053943391096 | 7.24832155500465  | -7.20691212857583  |
| C  | 11.10838902954391 | 7.68557758566056  | -8.30838049006341  |
| C  | 11.78977223958552 | 8.90474234648079  | -8.24749909873996  |
| C  | 12.58230063312539 | 9.44016023206426  | -9.31337475309906  |
| C  | 13.22738745435433 | 10.62967868871761 | -9.18202823064363  |
| C  | 13.14090056786332 | 11.38892255917516 | -7.97096074094979  |
| C  | 13.75606120043325 | 12.62884723441717 | -7.77117695653751  |
| C  | 13.13200560056370 | 10.35112461919877 | -2.18453899470742  |
| C  | 13.43015737062999 | 10.28086586820177 | -0.82251870845751  |
| C  | 12.42099553900545 | 10.35230888072007 | 0.13028758261145   |
| C  | 11.08901031098654 | 10.48180371500457 | -0.27969174515110  |
| C  | 9.97334378538221  | 10.55071187450734 | 0.61502503567414   |
| C  | 8.70141276302484  | 10.67204471796336 | 0.14835779089107   |
| C  | 8.43325017983184  | 10.72830351979643 | -1.25578954814667  |
| C  | 7.15603828349718  | 10.88341399350979 | -1.81084370379312  |
| C  | 13.57893206290882 | 13.30103434917579 | -6.56553589212200  |
| C  | 12.81735183752676 | 12.73650630331142 | -5.54253651315424  |
| C  | 12.37265975744470 | 10.86791584420807 | -6.90431553991231  |
| C  | 11.68983555907712 | 9.64272051538787  | -7.04562304155668  |
| C  | 9.56526759363545  | 7.56631449430120  | -4.81199047145983  |
| C  | 8.57240031360571  | 6.43343305665137  | -5.06964402969083  |
| C  | 10.55741814361969 | 7.17675937190188  | -3.70323969759944  |
| C  | 12.54806763712106 | 13.43611345206488 | -4.23317765304153  |
| C  | 11.10827273089410 | 13.97895103040809 | -4.22349866803034  |
| C  | 13.55690168000980 | 14.53300457168287 | -3.89717103367373  |
| C  | 7.00996042396703  | 10.96427645860340 | -3.18770714899465  |
| C  | 8.12409360900991  | 10.86211553303929 | -4.02910178462379  |
| C  | 9.52169831740256  | 10.64345553200677 | -2.15287969561757  |
| C  | 10.84361360949037 | 10.53901336053712 | -1.67037257199095  |
| C  | 14.18788862797545 | 10.24494853959607 | -3.25787092705431  |
| C  | 14.15620398107530 | 8.84568678498399  | -3.89584773926663  |
| C  | 15.59362982423014 | 10.60232030169483 | -2.77705367469792  |
| C  | 7.99851057364161  | 10.99343451836464 | -5.52674909946259  |
| C  | 6.97093560578745  | 10.01953098530202 | -6.11517341124697  |
| C  | 7.65372146930908  | 12.44315588022891 | -5.90706528592436  |
| H  | 9.86205082761482  | 6.30135568869305  | -7.24054346282575  |
| H  | 11.15451043504789 | 7.08570487416977  | -9.20949936429423  |
| H  | 12.65729916014683 | 8.87315383761629  | -10.23381084724739 |
| H  | 13.81873752226682 | 11.02696764298584 | -9.99853729936370  |
| H  | 14.35770156326561 | 13.06574903137711 | -8.55929588199366  |
| H  | 14.46035029267855 | 10.17248323276554 | -0.51519211630706  |
| H  | 12.65858976875152 | 10.30543239886751 | 1.18638695106876   |
| H  | 10.16492620789510 | 10.50661057707165 | 1.68065421586266   |
| H  | 7.86686768452618  | 10.73254184089166 | 0.83686290914646   |

|   |                   |                   |                   |
|---|-------------------|-------------------|-------------------|
| H | 6.29186410713513  | 10.95394803212925 | -1.16083999535747 |
| H | 14.03322351388764 | 14.26912340981832 | -6.41129703659106 |
| H | 9.01049275050279  | 8.43742387492335  | -4.45506261727207 |
| H | 12.60160933383862 | 12.66738785297104 | -3.45655504877240 |
| H | 9.08302728889105  | 5.50126651245257  | -5.32294235282687 |
| H | 7.98918795753384  | 6.25095689949353  | -4.16551109973493 |
| H | 7.87864156885649  | 6.67587570551606  | -5.87717402709396 |
| H | 11.21027272200188 | 8.01180860609890  | -3.44165137681891 |
| H | 10.01355483587277 | 6.88005766841962  | -2.80431825867795 |
| H | 11.18494971058982 | 6.34065887581792  | -4.02003104183477 |
| H | 10.38998829000059 | 13.17693452546371 | -4.40726553633207 |
| H | 10.88107772601894 | 14.42210204435767 | -3.25197753859205 |
| H | 10.97513470501000 | 14.74259038912090 | -4.99319698075067 |
| H | 13.47274130818416 | 15.38102722549835 | -4.58089647964201 |
| H | 13.36579196750477 | 14.90674722115624 | -2.88984163970069 |
| H | 14.58290729767651 | 14.16067054170847 | -3.93250149425975 |
| H | 6.03313816759515  | 11.11077867666309 | -3.62853822174399 |
| H | 13.89994541966736 | 10.95514216817068 | -4.03606191196952 |
| H | 8.98025749000914  | 10.75496954842994 | -5.94483627265884 |
| H | 14.39417735850007 | 8.07553081585799  | -3.15863075831567 |
| H | 14.88795445718005 | 8.78920171800342  | -4.70413522433027 |
| H | 13.17185406615664 | 8.62638111881910  | -4.31443974018309 |
| H | 15.61609523178361 | 11.58017693765876 | -2.29142784753821 |
| H | 16.27190227513870 | 10.63184079442765 | -3.63155594265475 |
| H | 15.98321129090251 | 9.85934592995225  | -2.07706806729431 |
| H | 7.19551120490820  | 8.98686845756757  | -5.84644319320465 |
| H | 6.97210301663410  | 10.09814191590309 | -7.20401256926302 |
| H | 5.96194922010281  | 10.24975259579251 | -5.76596468714020 |
| H | 6.66901485734193  | 12.72086969649676 | -5.52494716398615 |
| H | 8.38480292976897  | 13.14738623127074 | -5.50727051390842 |
| H | 7.63714833943357  | 12.54418598160591 | -6.99413330439505 |

**[4]<sup>2+</sup> - D<sup>ox</sup> (S = 1)**

Eh = -4359.472910490747

|    |                   |                   |                   |
|----|-------------------|-------------------|-------------------|
| Cu | 1.37199772057258  | 14.75276771727535 | 7.89631015453648  |
| P  | 2.10558222688648  | 13.98881097010600 | 9.93264695712370  |
| P  | 1.86733551910234  | 16.99437920359457 | 8.02303360949383  |
| O  | 4.29560753557729  | 15.31288083530455 | 8.64124052006841  |
| N  | -0.36909981899019 | 14.70496104669832 | 6.80758890042867  |
| C  | -1.46109371154916 | 15.45465116236057 | 6.90717567338724  |
| H  | -1.43089851296341 | 16.26437014871643 | 7.62555342434602  |
| C  | -2.59549925068140 | 15.23963319092477 | 6.11650868703481  |
| H  | -3.45887737124492 | 15.87921016119322 | 6.24160144743297  |
| C  | -2.58638062730837 | 14.22373796247037 | 5.18553189266782  |
| H  | -3.44930802827741 | 14.04221998325430 | 4.55554688069276  |
| C  | -1.43899266543749 | 13.41735506207147 | 5.04761224034265  |
| C  | -0.34798921187817 | 13.69979507276724 | 5.89480460927979  |
| N  | 1.86680542453388  | 13.23416250698800 | 6.63935417187951  |
| C  | 1.71302070290081  | 17.85110577650831 | 9.60103847612004  |
| C  | 0.66022069872011  | 17.49692673962198 | 10.44985674653974 |
| H  | 0.01404821705057  | 16.66591861483250 | 10.19548661168750 |
| C  | 0.44514826154201  | 18.20350073057857 | 11.62453114592808 |
| H  | -0.37251739448157 | 17.92802814898996 | 12.27910407063103 |
| C  | 1.28778444147768  | 19.26031878852541 | 11.96037850720934 |
| H  | 1.12321498240685  | 19.81236702495885 | 12.87755140575721 |
| C  | 2.34459924577408  | 19.60712939282093 | 11.12298711151517 |
| H  | 3.00028248795296  | 20.42760148441496 | 11.38716244933579 |

|   |                   |                   |                   |
|---|-------------------|-------------------|-------------------|
| C | 2.56148549351064  | 18.90701264078931 | 9.94230186745210  |
| H | 3.38178966450621  | 19.17987088877409 | 9.28984420485812  |
| C | 0.79162654673174  | 17.86621220049754 | 6.85864438045628  |
| C | -0.08197298568369 | 18.87099357218130 | 7.28295857525448  |
| H | -0.07516011734000 | 19.19668282609025 | 8.31540298196412  |
| C | -0.95039585820142 | 19.46200608684165 | 6.36988073511043  |
| H | -1.61846819303580 | 20.24880802023669 | 6.69783514275151  |
| C | -0.94924369188241 | 19.05639407683763 | 5.03915413694554  |
| H | -1.62142100768058 | 19.52464641046021 | 4.33060821311897  |
| C | -0.07525606976096 | 18.05598481449239 | 4.61210452623750  |
| H | -0.06706850952777 | 17.74801394853916 | 3.57374706866128  |
| C | 0.78564258683858  | 17.45598388454483 | 5.51744722882401  |
| H | 1.46072192285999  | 16.67491767680121 | 5.18477464011784  |
| C | 3.54521976279474  | 17.21610074152920 | 7.36428770802488  |
| C | 3.83658025049295  | 18.21824547418396 | 6.43006318136093  |
| H | 3.06462251783967  | 18.91931185606146 | 6.14059223023216  |
| C | 5.10317023625434  | 18.30986119853549 | 5.86674689597896  |
| H | 5.31682968636864  | 19.09485617532539 | 5.15261213843854  |
| C | 6.08872185488610  | 17.38913320951691 | 6.20993537529139  |
| H | 7.07111914634688  | 17.45044571426716 | 5.75856409503512  |
| C | 5.82148195434958  | 16.38959303380433 | 7.14265296000225  |
| H | 6.57751907039443  | 15.67098175893306 | 7.43307204685631  |
| C | 4.56478546689790  | 16.32212948767885 | 7.71767207494189  |
| C | 4.23594371554773  | 15.71482867532222 | 9.97547163787921  |
| C | 5.12632156019406  | 16.63291819007928 | 10.50944709991236 |
| H | 5.89403853286080  | 17.07381929086384 | 9.88692756549984  |
| C | 5.00532962984891  | 16.97973930676450 | 11.85045965926399 |
| H | 5.69700411841484  | 17.69506538819300 | 12.27772350879238 |
| C | 4.00517319918668  | 16.41997869333063 | 12.64134050452047 |
| H | 3.91155845105551  | 16.70382444954214 | 13.68148847374513 |
| C | 3.12437960970789  | 15.49653799197402 | 12.09640136079711 |
| H | 2.33599078905952  | 15.07295242542396 | 12.70463196632857 |
| C | 3.23706968143316  | 15.12579713587468 | 10.75336097143045 |
| C | 2.95632257533612  | 12.39993363906329 | 9.79289693445703  |
| C | 4.34080734366216  | 12.28449207908212 | 9.94282210959104  |
| H | 4.93486922433678  | 13.14911643643890 | 10.20938687138229 |
| C | 4.95310219201969  | 11.04777726637708 | 9.77042658529610  |
| H | 6.02404667757426  | 10.95586117913470 | 9.90335477490298  |
| C | 4.19127509382914  | 9.92854607924789  | 9.44616834815622  |
| H | 4.67125170774927  | 8.96563731374389  | 9.32147378016155  |
| C | 2.80928494728906  | 10.04121206449013 | 9.29792540418754  |
| H | 2.21486131125825  | 9.16749036560848  | 9.06059341608243  |
| C | 2.19187371861326  | 11.27193009788098 | 9.46438449164836  |
| H | 1.11629522948000  | 11.35732456721709 | 9.35679860801632  |
| C | 0.70059028124219  | 13.66313376056895 | 11.02154713460488 |
| C | 0.87254736710616  | 12.93602960233172 | 12.20647228088980 |
| H | 1.85158831257011  | 12.55891037181360 | 12.47729992997897 |
| C | -0.21925274028932 | 12.68818372090264 | 13.02767369596678 |
| H | -0.08456421206767 | 12.13161839738808 | 13.94689967802576 |
| C | -1.48582015274358 | 13.14400065269050 | 12.66604415070100 |
| H | -2.33476604431547 | 12.94139136107091 | 13.30729433304068 |
| C | -1.66586413240606 | 13.84339568798549 | 11.47661980499064 |
| H | -2.65418752238762 | 14.17869920511010 | 11.18708586593414 |
| C | -0.57460770663590 | 14.10070954663408 | 10.65556031588274 |
| H | -0.71363616462726 | 14.62422648429619 | 9.71557342771693  |
| C | -1.32914067225664 | 12.34696970361144 | 4.10415698650330  |
| H | -2.17504673339648 | 12.13423398483255 | 3.46180092801209  |

|   |                   |                   |                  |
|---|-------------------|-------------------|------------------|
| C | -0.18831825734073 | 11.61250990035425 | 4.00794375632923 |
| H | -0.11265720585808 | 10.80873727430172 | 3.28563183075503 |
| C | 0.84715560275683  | 12.92115968259005 | 5.79912547237751 |
| C | 0.93666541974194  | 11.88405142406590 | 4.84985361354031 |
| C | 2.15362066238779  | 11.17499742013086 | 4.78488200557811 |
| H | 2.26688704062998  | 10.36822048506552 | 4.07018829058014 |
| C | 3.18707055822616  | 11.51883217161352 | 5.62804975973473 |
| H | 4.13439463857529  | 10.99777501690928 | 5.59710745320187 |
| C | 3.00501210760513  | 12.55469508141007 | 6.55246453931110 |
| H | 3.78955264538041  | 12.83460800676689 | 7.24319657293763 |

**[4]<sup>0</sup> - D<sup>red</sup> (S = 1)**

Eh = -4359.916294904858

|    |                   |                   |                   |
|----|-------------------|-------------------|-------------------|
| Cu | 1.18969538114738  | 14.50987851968899 | 8.28448474770948  |
| P  | 1.97895577555263  | 13.68737291546813 | 10.16597530617585 |
| P  | 2.03509694930928  | 16.59316241537421 | 7.86186867761569  |
| O  | 4.30542397702547  | 15.10318373256749 | 9.16085249723765  |
| N  | -0.70935925883964 | 14.73626341642332 | 7.59088567225576  |
| C  | -1.77140625697126 | 15.39472269674470 | 8.07435218306418  |
| H  | -1.68023694558975 | 15.75325309159079 | 9.09489337348655  |
| C  | -2.93123366969101 | 15.63743039682065 | 7.35905327877467  |
| H  | -3.74703607080070 | 16.17452329521734 | 7.82507185202519  |
| C  | -3.01719010669405 | 15.17847864360295 | 6.03365962636824  |
| H  | -3.90576937060458 | 15.35442020386991 | 5.43795636645552  |
| C  | -1.93487399403216 | 14.50587996274161 | 5.47784733084178  |
| C  | -0.77364842550989 | 14.28986430967594 | 6.27768175300246  |
| N  | 1.48200637022663  | 13.53366321632467 | 6.53612086001999  |
| C  | 1.77410415378537  | 17.92563108826645 | 9.08432746963190  |
| C  | 0.87540279753146  | 17.68807853620068 | 10.12471194581769 |
| H  | 0.38475329797942  | 16.72287841905824 | 10.18517770138990 |
| C  | 0.63409482656826  | 18.66701796431607 | 11.08258730375943 |
| H  | -0.06043460830170 | 18.47092762402530 | 11.89108173577160 |
| C  | 1.29830517469143  | 19.88658385195147 | 11.01160820637875 |
| H  | 1.11783369254329  | 20.64731582818828 | 11.76231766120617 |
| C  | 2.20268526680348  | 20.12784661360947 | 9.97907304765233  |
| H  | 2.72354156299233  | 21.07701573619016 | 9.92431456389978  |
| C  | 2.43785503379963  | 19.15352948378577 | 9.01800572202260  |
| H  | 3.14493233902823  | 19.34053064842787 | 8.21838037018245  |
| C  | 1.19531422898845  | 17.20440342749158 | 6.36518836615308  |
| C  | 0.17702832463126  | 18.15634475598871 | 6.44424119330807  |
| H  | -0.02464119609896 | 18.65329007929273 | 7.38501695820178  |
| C  | -0.59095787359917 | 18.45514291305145 | 5.32370442327717  |
| H  | -1.38626941651595 | 19.18746639284430 | 5.39987527317621  |
| C  | -0.35021489810508 | 17.80813192940499 | 4.11699530841265  |
| H  | -0.95858771894928 | 18.03215380180763 | 3.24863708551463  |
| C  | 0.66526047690637  | 16.85948068605570 | 4.03072754737441  |
| H  | 0.84582789887004  | 16.33479847949418 | 3.10040333267085  |
| C  | 1.42897204807702  | 16.55199044673922 | 5.14759623332847  |
| H  | 2.19501509647525  | 15.78885931262881 | 5.08144020809861  |
| C  | 3.81274698389438  | 16.73531232207551 | 7.44658760525162  |
| C  | 4.29511362367715  | 17.51941880836156 | 6.39431417937762  |
| H  | 3.59602769955338  | 18.12140859377055 | 5.82661848606475  |
| C  | 5.64216703979342  | 17.51170408533641 | 6.05076949914530  |
| H  | 5.99179211783144  | 18.12617954521846 | 5.22978725487439  |
| C  | 6.53386995300422  | 16.70456717768055 | 6.75024515433463  |
| H  | 7.58235523787456  | 16.68429767636296 | 6.47782567078501  |
| C  | 6.07975175505533  | 15.91839153977147 | 7.80406982773349  |



|   |                   |                   |                   |
|---|-------------------|-------------------|-------------------|
| H | 6.74887604495719  | 15.27698935363074 | 8.36404715955545  |
| C | 4.73594977988482  | 15.94818011830791 | 8.14666387771653  |
| C | 3.90399674377397  | 15.66900335007226 | 10.35724332769855 |
| C | 4.48076545048757  | 16.82821453959607 | 10.85695761444890 |
| H | 5.23286281739781  | 17.34759521151438 | 10.27661469443399 |
| C | 4.06303747871676  | 17.31542369738470 | 12.09047879879954 |
| H | 4.49899256029048  | 18.22888350631751 | 12.47635673983413 |
| C | 3.09520951834148  | 16.63656183012231 | 12.82190081340658 |
| H | 2.77213182536870  | 17.01653442622645 | 13.78336253009712 |
| C | 2.51853017410577  | 15.48188548243532 | 12.30425478199644 |
| H | 1.73755288763894  | 14.97356545466120 | 12.85572810499308 |
| C | 2.90166057953638  | 14.98497401966650 | 11.05777042426470 |
| C | 3.15545353146189  | 12.29954653105462 | 10.02457997145766 |
| C | 4.34024086978757  | 12.22694293265738 | 10.75777756305288 |
| H | 4.59605541817700  | 13.02416417720162 | 11.44627189817271 |
| C | 5.19588153138427  | 11.14197157883795 | 10.59795286615262 |
| H | 6.11687233053851  | 11.09329201587633 | 11.16779775925656 |
| C | 4.87255488874380  | 10.12300143427873 | 9.70668123188595  |
| H | 5.54129158116885  | 9.27924177565684  | 9.58145767021088  |
| C | 3.69339447031494  | 10.19322535887191 | 8.96898916073320  |
| H | 3.44307922280462  | 9.40839034062272  | 8.26475785602301  |
| C | 2.84143045537897  | 11.28029182864650 | 9.12087787250695  |
| H | 1.93602044572486  | 11.35458236190412 | 8.52855834365498  |
| C | 0.79070987552998  | 13.08611333832551 | 11.41642223748215 |
| C | 1.16840603613102  | 12.32914209130335 | 12.52908568911770 |
| H | 2.20941572560845  | 12.06191158881172 | 12.66971291150168 |
| C | 0.21210064632562  | 11.91207901056214 | 13.44652142273975 |
| H | 0.50978169286324  | 11.32308536740472 | 14.30645162627900 |
| C | -1.12852808153122 | 12.24403007115774 | 13.25836017295978 |
| H | -1.87289363722668 | 11.91350515088447 | 13.97360729505234 |
| C | -1.51261109515042 | 12.98581955304257 | 12.14605027544110 |
| H | -2.55642804298792 | 13.23042080356847 | 11.98720963126930 |
| C | -0.55572400752937 | 13.40084237694865 | 11.22510748848826 |
| H | -0.84393615829145 | 13.95245167985067 | 10.33688452835952 |
| C | -1.91523879784706 | 14.03397731412368 | 4.12395212358001  |
| H | -2.79997896395713 | 14.19118654197606 | 3.51552002721156  |
| C | -0.82467318363885 | 13.41713182055881 | 3.60138168526393  |
| H | -0.82785307311966 | 13.07616099843855 | 2.57106377097074  |
| C | 0.35640696538819  | 13.65895051445561 | 5.73452603187076  |
| C | 0.36273688033573  | 13.21376225571635 | 4.37863642562140  |
| C | 1.52344404941255  | 12.64271148940303 | 3.86848267615120  |
| H | 1.54818369634182  | 12.30375298884501 | 2.83871670935748  |
| C | 2.65580903581669  | 12.52626878528597 | 4.69539780932920  |
| H | 3.57792552309255  | 12.09243011264533 | 4.33129613471150  |
| C | 2.57993546701375  | 12.98442743994127 | 6.00105604269442  |
| H | 3.43844256812139  | 12.91647179769602 | 6.66060736436486  |

**[4]<sup>+</sup> - s<sub>0</sub> (s = 0)**

|      |                   |                   |                   |
|------|-------------------|-------------------|-------------------|
| Eh = | -4359.78575513344 |                   |                   |
| Cu   | 1.14705950946459  | 14.58379729212471 | 8.34162563765487  |
| P    | 1.90802487597823  | 13.71660473499917 | 10.23455010612396 |
| P    | 1.91357624877456  | 16.67820606174844 | 7.87755812966348  |
| O    | 4.16809257645531  | 15.06606963479917 | 9.01977036978133  |
| N    | -0.70374507972226 | 14.60104510873049 | 7.43962895892325  |
| C    | -1.84491224670862 | 15.14688405838039 | 7.84556328030811  |
| H    | -1.87577391807222 | 15.48654255981591 | 8.87357860452583  |
| C    | -2.96063742741424 | 15.29275383030697 | 7.01452138753089  |

|   |                   |                   |                   |
|---|-------------------|-------------------|-------------------|
| H | -3.86325226275985 | 15.74151980815414 | 7.40799787114749  |
| C | -2.88618216692584 | 14.86320933863569 | 5.70796173953993  |
| H | -3.73179246729236 | 14.96546053087260 | 5.03804246748337  |
| C | -1.69028294565230 | 14.29068484400532 | 5.23907727389675  |
| C | -0.61869894899086 | 14.17982995457059 | 6.15095416080323  |
| N | 1.64540915666162  | 13.58323191145526 | 6.60831501112718  |
| C | 1.71029499208896  | 17.96276790734467 | 9.14825695986633  |
| C | 0.92712586277917  | 17.66412776193052 | 10.26354801486374 |
| H | 0.48791897075792  | 16.67654465105987 | 10.35160855015764 |
| C | 0.73727293349403  | 18.61326462131617 | 11.26177957404709 |
| H | 0.13552931746158  | 18.37211225218365 | 12.12974647185750 |
| C | 1.33475350419286  | 19.86371828860830 | 11.14948153830392 |
| H | 1.19310655269898  | 20.60342361471427 | 11.92833445193130 |
| C | 2.12293923479900  | 20.16584353327180 | 10.04002187912514 |
| H | 2.59101716147710  | 21.13935718204563 | 9.95623212838065  |
| C | 2.31152299233208  | 19.21991994729949 | 9.04161779957025  |
| H | 2.93165656637368  | 19.45320225350362 | 8.18432655927042  |
| C | 1.02156911502047  | 17.30091878986320 | 6.41819071764444  |
| C | -0.06315880832555 | 18.16890688268950 | 6.56452851388808  |
| H | -0.27892112583553 | 18.60233525248114 | 7.53375225335134  |
| C | -0.86121803490338 | 18.48412312541945 | 5.46922945462067  |
| H | -1.69511207506257 | 19.16496872691467 | 5.59261051272877  |
| C | -0.58734281784896 | 17.93670088329391 | 4.22026164748846  |
| H | -1.20721767313272 | 18.18841784180088 | 3.36822954280820  |
| C | 0.49465196888851  | 17.07362712498451 | 4.06615283476482  |
| H | 0.71849349039681  | 16.64883387360772 | 3.09493649611183  |
| C | 1.29000421649956  | 16.75108350076130 | 5.15727758671706  |
| H | 2.13069656908237  | 16.07948015462111 | 5.02888596567124  |
| C | 3.67046552152430  | 16.77019211893323 | 7.38695128989042  |
| C | 4.13843508926331  | 17.60445260464274 | 6.36635739317453  |
| H | 3.44361580028530  | 18.26235065381505 | 5.85915067151707  |
| C | 5.47345579175589  | 17.58209721923772 | 5.98052468030401  |
| H | 5.81528795674666  | 18.23763136018897 | 5.18914836500929  |
| C | 6.36454543259504  | 16.71334568903869 | 6.60317369555573  |
| H | 7.40344574418121  | 16.68635468393365 | 6.29809602823101  |
| C | 5.92477883611635  | 15.88186570851088 | 7.62818433155458  |
| H | 6.59834190322537  | 15.20392208757524 | 8.13734250087754  |
| C | 4.59449329992418  | 15.92832753890855 | 8.01689639058935  |
| C | 3.92688800946476  | 15.61005877136996 | 10.27327240969696 |
| C | 4.60878748356544  | 16.72233009680531 | 10.74406201301997 |
| H | 5.33071205602513  | 17.22312442168046 | 10.11209187732122 |
| C | 4.34052865860901  | 17.18410821646857 | 12.02849148908633 |
| H | 4.86421617516208  | 18.05699637527510 | 12.39829676585075 |
| C | 3.41510195526560  | 16.52979946706471 | 12.83355609579645 |
| H | 3.21420974582510  | 16.88801549471254 | 13.83531499108858 |
| C | 2.73220968254322  | 15.42216901964368 | 12.34441475953256 |
| H | 1.98809836202049  | 14.93014381371139 | 12.95786339370961 |
| C | 2.96658968268351  | 14.95285351019596 | 11.05083378812605 |
| C | 2.95831304424160  | 12.25004332259862 | 9.99058943508645  |
| C | 4.23159876205049  | 12.13002477894677 | 10.54873537706817 |
| H | 4.62659184141782  | 12.92742250947171 | 11.16701929449834 |
| C | 4.99272281138853  | 10.99000058053297 | 10.30984994959615 |
| H | 5.98082764441582  | 10.90247688834272 | 10.74585957012066 |
| C | 4.48586391761327  | 9.96387029567328  | 9.51873236726546  |
| H | 5.07962230677793  | 9.07599357708071  | 9.33719317931162  |
| C | 3.21459763972436  | 10.07851034099949 | 8.96038082525178  |
| H | 2.81725546436727  | 9.28034608761595  | 8.34461958425456  |

|   |                   |                   |                   |
|---|-------------------|-------------------|-------------------|
| C | 2.45712945312589  | 11.21993276592201 | 9.18809093306184  |
| H | 1.47340417232797  | 11.31869258381558 | 8.74170508964625  |
| C | 0.74352142819448  | 13.22423534124519 | 11.54242128038193 |
| C | 1.07830719059367  | 12.30055555273997 | 12.53594967892363 |
| H | 2.05281381174064  | 11.82694575295714 | 12.52572585810494 |
| C | 0.15992616409393  | 11.98491766373073 | 13.53032219331882 |
| H | 0.42253082441074  | 11.26528220977195 | 14.29644221252880 |
| C | -1.09474400603849 | 12.58954643285652 | 13.54211030888203 |
| H | -1.80817178655469 | 12.34002335352038 | 14.31825033871418 |
| C | -1.43623312188894 | 13.50635637108492 | 12.55211327335564 |
| H | -2.41566844993944 | 13.96981468358389 | 12.55472261380244 |
| C | -0.52147669931033 | 13.81561170602863 | 11.55248681970190 |
| H | -0.78347701959640 | 14.51513657795163 | 10.76603717118765 |
| C | -1.51431820229883 | 13.83727756359186 | 3.89373720908872  |
| H | -2.34655572508456 | 13.92951069464939 | 3.20584616132380  |
| C | -0.33333879944309 | 13.30727965878450 | 3.47976904149121  |
| H | -0.21002994005983 | 12.96954357494767 | 2.45740296650424  |
| C | 0.63032941637315  | 13.62825514108485 | 5.71087601157926  |
| C | 0.77525535181498  | 13.19127420696855 | 4.37638909507474  |
| C | 2.03115930883884  | 12.68217951138510 | 3.99652538192055  |
| H | 2.18474938247192  | 12.33633636298751 | 2.98085494912831  |
| C | 3.05239927779711  | 12.63556683568487 | 4.92146909956586  |
| H | 4.02884803941170  | 12.24959279903674 | 4.65934764346864  |
| C | 2.82073328368392  | 13.09909749236330 | 6.22211688160333  |
| H | 3.60018120952635  | 13.08057909201641 | 6.97359482357659  |

**[4]<sup>+</sup> - T<sub>1</sub> (S = 2)**

Eh = -4359.710820951739

|    |                   |                   |                   |
|----|-------------------|-------------------|-------------------|
| Cu | 1.38231032574932  | 14.70805210918575 | 7.84959532386350  |
| P  | 2.15485250775926  | 13.91513478767049 | 9.87963074673723  |
| P  | 1.90903703569402  | 16.96114398732342 | 7.98977055135090  |
| O  | 4.36254396482923  | 15.29721454882136 | 8.70376561567198  |
| N  | -0.32905175176881 | 14.79004866779127 | 6.85690725829630  |
| C  | -1.40192738380938 | 15.59673811488794 | 6.99812408522917  |
| H  | -1.29566695550353 | 16.41502184767169 | 7.70028093677906  |
| C  | -2.56506314430914 | 15.43139411429724 | 6.27705358176677  |
| H  | -3.38505812934941 | 16.11932153890804 | 6.43300645951384  |
| C  | -2.65831552726235 | 14.39298237797970 | 5.33159114954293  |
| H  | -3.55674978059778 | 14.26081447138761 | 4.74128831797061  |
| C  | -1.57340380889408 | 13.53633932517422 | 5.15560610951807  |
| C  | -0.41639851927870 | 13.74729114805818 | 5.94993853655769  |
| N  | 1.75476561657769  | 13.15851469399471 | 6.69244218444848  |
| C  | 1.72545547781896  | 17.86807124094622 | 9.54548898182107  |
| C  | 0.68184984129307  | 17.49634035247407 | 10.39651584532724 |
| H  | 0.06936998919774  | 16.63572815135112 | 10.15533246905379 |
| C  | 0.43214225106546  | 18.22131165175043 | 11.55415349551676 |
| H  | -0.37938957552132 | 17.92899394379606 | 12.20942305021590 |
| C  | 1.23180511988544  | 19.31520574660297 | 11.87207021219210 |
| H  | 1.04090090852393  | 19.88108466651324 | 12.77588426682610 |
| C  | 2.28205239865559  | 19.67992607551884 | 11.03396191536977 |
| H  | 2.90782045598630  | 20.52789414225869 | 11.28480144713602 |
| C  | 2.53137050952547  | 18.96061322800754 | 9.87137806269002  |
| H  | 3.34754799902747  | 19.24541643076873 | 9.21833524369832  |
| C  | 0.91607869709692  | 17.88331589480629 | 6.78592724709552  |
| C  | 0.16295928369915  | 19.00205523564630 | 7.14497655083432  |
| H  | 0.20720243159630  | 19.38514087315033 | 8.15664503773624  |
| C  | -0.64878376908377 | 19.62226040419827 | 6.19945623329625  |

|   |                   |                   |                   |
|---|-------------------|-------------------|-------------------|
| H | -1.23292997963581 | 20.48993332031415 | 6.48107660624517  |
| C | -0.70975202218602 | 19.13037016587030 | 4.90045662424526  |
| H | -1.34643595578093 | 19.61210626950282 | 4.16835035801144  |
| C | 0.04779976723662  | 18.01760081619404 | 4.53775006841493  |
| H | -0.00093320405296 | 17.63126927346330 | 3.52713270365438  |
| C | 0.85382204244766  | 17.39171999886554 | 5.47561222281267  |
| H | 1.42379847341555  | 16.51250313710479 | 5.19762643654294  |
| C | 3.62041679186617  | 17.18616008594263 | 7.39405168942847  |
| C | 3.93379172864463  | 18.17310283663626 | 6.45238704225416  |
| H | 3.16270766431106  | 18.86081489279358 | 6.13021638981601  |
| C | 5.21103419639476  | 18.26114226842791 | 5.91182610897917  |
| H | 5.43382686185820  | 19.03294173520860 | 5.18589252166606  |
| C | 6.19159552446033  | 17.34912226377665 | 6.28770702565468  |
| H | 7.18223159720687  | 17.40317511463474 | 5.85345946932358  |
| C | 5.90476005023306  | 16.36429578658883 | 7.22849191944779  |
| H | 6.65124525849940  | 15.64589856571170 | 7.54294866666946  |
| C | 4.63589708730794  | 16.30170235296580 | 7.77922014583360  |
| C | 4.22333137001119  | 15.70820213896609 | 10.02479163094403 |
| C | 5.04178682151591  | 16.67897050678675 | 10.58363009145054 |
| H | 5.80447009362967  | 17.15603513338700 | 9.98179797471751  |
| C | 4.85069315918262  | 17.03160860726581 | 11.91405653327218 |
| H | 5.48204319029432  | 17.79104309086833 | 12.35861688687747 |
| C | 3.85376839031644  | 16.42235852020607 | 12.67110526797877 |
| H | 3.70105560188233  | 16.71122174529740 | 13.70306528719908 |
| C | 3.04588742427706  | 15.44878352602907 | 12.10008022429436 |
| H | 2.25329918003108  | 14.99450284607998 | 12.68014046100965 |
| C | 3.22564602160430  | 15.07262258948150 | 10.76712971641536 |
| C | 3.03183276380305  | 12.33249602317626 | 9.83541169278092  |
| C | 4.40655161056701  | 12.23801334382649 | 10.05686292333866 |
| H | 4.97496521410910  | 13.11715553430207 | 10.33315585941385 |
| C | 5.04459623313211  | 11.00855031865751 | 9.92999428097782  |
| H | 6.11058320357270  | 10.93617451704861 | 10.10886930993322 |
| C | 4.31630903895606  | 9.87536692139039  | 9.58177877277678  |
| H | 4.81649435701846  | 8.91946288984855  | 9.48442687705891  |
| C | 2.94322156832326  | 9.96761503698432  | 9.36350740029945  |
| H | 2.37444918830891  | 9.08660806547580  | 9.09267224291168  |
| C | 2.30112660369243  | 11.19086930394558 | 9.48492033417989  |
| H | 1.23521335575892  | 11.26407679175805 | 9.30290195856284  |
| C | 0.71770903899349  | 13.58850305818219 | 10.93805875809164 |
| C | 0.84487854524742  | 12.88203638652795 | 12.13990654580503 |
| H | 1.81460002796547  | 12.51006680507287 | 12.44934831492021 |
| C | -0.27541429488922 | 12.64207981572035 | 12.92434252373830 |
| H | -0.17367836315100 | 12.09751003685199 | 13.85523149460664 |
| C | -1.52896666487585 | 13.08849272437367 | 12.50941591439802 |
| H | -2.40121583331087 | 12.89131183071651 | 13.12086925928105 |
| C | -1.66498405253100 | 13.76741307559515 | 11.30314340751445 |
| H | -2.64173411585555 | 14.09245449428510 | 10.96606921083317 |
| C | -0.54420637764584 | 14.01498239812397 | 10.51827441720579 |
| H | -0.65339505126580 | 14.51251793160319 | 9.56004008388430  |
| C | -1.53856017695462 | 12.44895381579441 | 4.21866166957460  |
| H | -2.41583621065243 | 12.27316364899739 | 3.60647380987162  |
| C | -0.43953878608196 | 11.65969938102378 | 4.08174884332313  |
| H | -0.43169813216995 | 10.85650821391815 | 3.35370686535709  |
| C | 0.69294622414970  | 12.90997892676210 | 5.84014851741738  |
| C | 0.73157603556172  | 11.85962708466730 | 4.88574644904314  |
| C | 1.89861171091036  | 11.10573834300011 | 4.78657011401877  |
| H | 1.96129410279266  | 10.29679389064920 | 4.06866459803793  |

|   |                  |                   |                  |
|---|------------------|-------------------|------------------|
| C | 2.98808679889508 | 11.41132446568708 | 5.61836646219881 |
| H | 3.91178563223722 | 10.85211581398211 | 5.55853818027222 |
| C | 2.87293284940565 | 12.42437457221146 | 6.55172503066202 |
| H | 3.68569335240834 | 12.65727618052556 | 7.22794088849366 |

[5]<sup>2+</sup> - D<sup>o\*</sup> (S = 1)

Eh = -4438.157879345236

|    |                   |                   |                   |
|----|-------------------|-------------------|-------------------|
| Cu | 3.40656684750851  | 11.83124907228011 | 13.74735259874155 |
| P  | 3.69136306122369  | 9.55596224724671  | 13.85906570480121 |
| P  | 4.83694743571418  | 12.67762083101370 | 15.36605461127075 |
| N  | 1.38891839834423  | 12.36450732266671 | 13.50384327267448 |
| N  | 3.62395273518454  | 13.10198457458339 | 12.16041423896504 |
| O  | 6.43604505175239  | 10.58998877179736 | 14.29895741253448 |
| C  | 0.28522931710117  | 11.94644200729208 | 14.12530145450869 |
| C  | -0.95684022808636 | 12.58336986864695 | 13.92322510108603 |
| H  | -1.82505928393094 | 12.21301604168127 | 14.45337837862144 |
| C  | -1.05729000310705 | 13.64811783591109 | 13.06745543403925 |
| H  | -2.00672115430043 | 14.14572832933932 | 12.90773634139934 |
| C  | 0.08904066725729  | 14.09051337595946 | 12.37605571082440 |
| C  | 1.29694436770660  | 13.40798620055126 | 12.62816168118635 |
| C  | 0.05982674430342  | 15.16942376679009 | 11.44281569389653 |
| H  | -0.87803763927784 | 15.68547870216927 | 11.27686364543704 |
| C  | 1.18097599045091  | 15.53185816483685 | 10.76372065235777 |
| H  | 1.15490879479597  | 16.34035240739189 | 10.04331933583079 |
| C  | 2.47632066923428  | 13.79589636011219 | 11.91716082194356 |
| C  | 2.41134843957390  | 14.84160059834218 | 10.97457748861373 |
| C  | 3.59215028105970  | 15.13831164648486 | 10.26107031612440 |
| H  | 3.58827414511260  | 15.93760597280794 | 9.52900703646967  |
| C  | 4.72540690630127  | 14.40168129341158 | 10.48907637847781 |
| H  | 5.63657506475811  | 14.59780203617270 | 9.93886718810459  |
| C  | 4.72312549605579  | 13.37371680487785 | 11.45374415888272 |
| C  | 0.35762835677635  | 10.77045323520349 | 15.04309512252501 |
| H  | 1.38220637890716  | 10.42917293120187 | 15.16344369785650 |
| H  | -0.23072381227654 | 9.94378032221758  | 14.63840270018392 |
| H  | -0.05653664821853 | 11.01680729909535 | 16.02366942859991 |
| C  | 5.94224902253771  | 12.54505468689428 | 11.67810829984911 |
| H  | 5.85244723074617  | 11.97303420100386 | 12.59739653749557 |
| H  | 6.83298894984930  | 13.17205429611745 | 11.73374813000536 |
| H  | 6.07454494629255  | 11.84980059147637 | 10.84321241014583 |
| C  | 5.20252170266799  | 8.96840678232643  | 13.04211126000483 |
| C  | 6.43545702185850  | 9.49859050025037  | 13.43647190738301 |
| C  | 7.62752068545470  | 9.05369448244007  | 12.89361110687414 |
| H  | 8.56058542015901  | 9.50193456141705  | 13.21089876754514 |
| C  | 7.59527716290443  | 8.04482346326356  | 11.93330555928396 |
| H  | 8.52226631639877  | 7.68734335356710  | 11.50279033313658 |
| C  | 6.38008916477183  | 7.50685688794230  | 11.51890366587881 |
| H  | 6.35968550469413  | 6.72749186031026  | 10.76776408363554 |
| C  | 5.18780051368826  | 7.96771165785319  | 12.06531237916605 |
| H  | 4.24290401522459  | 7.55314423384429  | 11.73770229022138 |
| C  | 3.64776630064401  | 8.65267882420811  | 15.42650146804971 |
| C  | 4.01977295898845  | 7.30226801947857  | 15.45051971246067 |
| H  | 4.36155142815332  | 6.81470446884349  | 14.54549955237496 |
| C  | 3.95237849397490  | 6.58769080445202  | 16.63828776061558 |
| H  | 4.23253942881849  | 5.54162757720624  | 16.65223551305836 |
| C  | 3.52827935371507  | 7.21464308111236  | 17.80831368931444 |
| H  | 3.48128359185099  | 6.65474411553971  | 18.73424997117948 |
| C  | 3.17534946402441  | 8.56011486033004  | 17.79127920797517 |

|   |                   |                   |                   |
|---|-------------------|-------------------|-------------------|
| H | 2.86260345218303  | 9.05307233076785  | 18.70333012732080 |
| C | 3.23653838890018  | 9.27820791443392  | 16.60403077685778 |
| H | 2.98845135902483  | 10.33149687490388 | 16.60026880360985 |
| C | 2.33757477731155  | 8.93554262353622  | 12.83059064530274 |
| C | 1.46922200465211  | 7.92807205218815  | 13.25779179594358 |
| H | 1.61286097635046  | 7.45861093603394  | 14.22277781363068 |
| C | 0.42191996681086  | 7.52679105534023  | 12.43546758898505 |
| H | -0.24388572308870 | 6.73700932258784  | 12.76115876947754 |
| C | 0.23259381863335  | 8.13146397753211  | 11.19569894740686 |
| H | -0.58361923522560 | 7.81374707281409  | 10.55860642551603 |
| C | 1.09388437993061  | 9.14145735971141  | 10.76909585521063 |
| H | 0.94834581999052  | 9.60837272172824  | 9.80278387812309  |
| C | 2.14018693637638  | 9.54713266482585  | 11.58400126982509 |
| H | 2.81051889494257  | 10.33423205755724 | 11.25370290389609 |
| C | 5.70851648878318  | 11.44493044808056 | 16.34789757036446 |
| C | 6.36753300237542  | 10.41574635967962 | 15.66871040376676 |
| C | 6.93089396559715  | 9.34322021192656  | 16.33910944592837 |
| H | 7.41635706258266  | 8.54742281840355  | 15.78921094016765 |
| C | 6.85322615642997  | 9.31717069853094  | 17.72802382231708 |
| H | 7.28993810275985  | 8.48479001500942  | 18.26562845208671 |
| C | 6.23548958018680  | 10.35050080476786 | 18.43075724958769 |
| H | 6.19892127391097  | 10.32453761496996 | 19.51210334689575 |
| C | 5.65466791350029  | 11.40738654755178 | 17.74480780119401 |
| H | 5.14790613663035  | 12.19802576917030 | 18.28327630806930 |
| C | 6.03821546515409  | 13.84898038717276 | 14.70685345569858 |
| C | 5.56063984796297  | 15.01005668742793 | 14.08364996740270 |
| H | 4.49525282074781  | 15.20409231104145 | 14.03631937223001 |
| C | 6.45412503776629  | 15.92351912315376 | 13.54434446961444 |
| H | 6.08409996213366  | 16.82667849961495 | 13.07495230345663 |
| C | 7.82556322021904  | 15.68145503825725 | 13.61426834573468 |
| H | 8.52246090413346  | 16.39638199766651 | 13.19436236624446 |
| C | 8.30221516394539  | 14.53038627254566 | 14.23646079296305 |
| H | 9.36821504385469  | 14.35269847935977 | 14.30612146197196 |
| C | 7.41335512651346  | 13.61213608539490 | 14.78222926020815 |
| H | 7.78665824080811  | 12.72385982949572 | 15.27484424366448 |
| C | 3.81026124984996  | 13.62553183347866 | 16.51371226346245 |
| C | 2.50676392403388  | 13.19146414487734 | 16.77528868384858 |
| H | 2.11687517934167  | 12.32579349027604 | 16.25424423044486 |
| C | 1.71278057152984  | 13.87168106496778 | 17.68802646784193 |
| H | 0.70363088069813  | 13.53321871032492 | 17.88898320637449 |
| C | 2.21536839860501  | 14.99519810510709 | 18.33998507675668 |
| H | 1.59681528931385  | 15.52938590216494 | 19.05060985222169 |
| C | 3.51049388688911  | 15.43671347369018 | 18.07796129454297 |
| H | 3.89986718316146  | 16.30923573115787 | 18.58782271351633 |
| C | 4.30955551463267  | 14.76014450380713 | 17.16496817648733 |
| H | 5.31563753181376  | 15.10515774700065 | 16.96315384221569 |

**[5]<sup>0</sup> - D<sup>red</sup> (S = 1)**

|      |                    |                   |                   |
|------|--------------------|-------------------|-------------------|
| Eh = | -4438.597821723871 |                   |                   |
| Cu   | 3.44911993185535   | 12.02225517103192 | 14.14155024626345 |
| P    | 3.81148865062055   | 9.79610988707633  | 13.74792599752983 |
| P    | 4.82273552548343   | 12.95243787140797 | 15.59738860614371 |
| N    | 1.43156054435164   | 12.20844715767028 | 14.16344416188987 |
| N    | 3.28042517974756   | 12.74593897251999 | 12.24446140738421 |
| O    | 6.53835161549228   | 10.90202008269826 | 14.53475846473776 |
| C    | 0.51491012552571   | 11.88679593158531 | 15.09945628690376 |
| C    | -0.84745524655642  | 12.05156444307672 | 14.89520686833658 |

|   |                   |                   |                   |
|---|-------------------|-------------------|-------------------|
| H | -1.53760892955216 | 11.78457542136395 | 15.68583830535844 |
| C | -1.31538683839387 | 12.54258672094397 | 13.66330261786489 |
| H | -2.37694588127179 | 12.66843931682460 | 13.48205528492421 |
| C | -0.39992599921381 | 12.85728120166638 | 12.66484127413658 |
| C | 0.98836758029556  | 12.68237927857818 | 12.93586704167626 |
| C | -0.78188448058859 | 13.33121539313085 | 11.36660356043884 |
| H | -1.83910629905827 | 13.46962019308525 | 11.16417146153443 |
| C | 0.14177062212233  | 13.59184426246107 | 10.40537689089601 |
| H | -0.16699852581021 | 13.93934689950366 | 9.42472512955555  |
| C | 1.94263485690878  | 12.95730788777147 | 11.94340022069953 |
| C | 1.53844915280152  | 13.40544703193696 | 10.65040996089576 |
| C | 2.52153505043936  | 13.61770399655015 | 9.68988062599291  |
| H | 2.23896422976833  | 13.95740580994384 | 8.69912064941563  |
| C | 3.86131922257186  | 13.37133601714232 | 10.00632950600695 |
| H | 4.64428975938060  | 13.50947823145978 | 9.27106099797763  |
| C | 4.19712213903116  | 12.92670598360607 | 11.28713119971485 |
| C | 1.03555350673347  | 11.28704736524828 | 16.37226844330569 |
| H | 2.01690775062226  | 11.69897612411943 | 16.61536576030128 |
| H | 1.15754048911690  | 10.20579810777836 | 16.26032935745516 |
| H | 0.35165037477105  | 11.46619554222058 | 17.20358173328452 |
| C | 5.61779987077684  | 12.57947313887886 | 11.62557351825233 |
| H | 5.72160628105817  | 12.42593048815250 | 12.69827193193386 |
| H | 6.30816353022370  | 13.36363487885563 | 11.30854554989419 |
| H | 5.91212809660743  | 11.65451004516870 | 11.11878489560600 |
| C | 5.46154615118150  | 9.20948557322985  | 13.18466482406618 |
| C | 6.62370206666866  | 9.82929482475709  | 13.65589166928700 |
| C | 7.88496053642126  | 9.45980783923375  | 13.20839182515402 |
| H | 8.74978710065074  | 9.99081566494947  | 13.58612928065119 |
| C | 8.00897592792226  | 8.42659268193126  | 12.28768711233177 |
| H | 8.99097031513644  | 8.13439874440562  | 11.93526235790657 |
| C | 6.87147127629066  | 7.77132930674086  | 11.82415455995640 |
| H | 6.96140374781526  | 6.96169160779232  | 11.10984987727646 |
| C | 5.61549886359148  | 8.16406247122062  | 12.26817741577745 |
| H | 4.73207322999183  | 7.67040601410180  | 11.88217795766137 |
| C | 3.34180734656219  | 8.46560975738328  | 14.91581804137881 |
| C | 2.93593988244571  | 7.19697966477384  | 14.49086704139590 |
| H | 2.84066070353410  | 6.98904166986390  | 13.43180885358717 |
| C | 2.63482471824042  | 6.21043295779609  | 15.42110968011406 |
| H | 2.31606960469802  | 5.23076012888796  | 15.08383372113129 |
| C | 2.74153928585886  | 6.47924308829711  | 16.78455653451302 |
| H | 2.50564244474020  | 5.70769487787163  | 17.50850756765649 |
| C | 3.14359152161909  | 7.73920755483508  | 17.21349122055557 |
| H | 3.22457971158750  | 7.95808418519674  | 18.27173352924506 |
| C | 3.43589594847311  | 8.73023799780180  | 16.28226025790064 |
| H | 3.73953506707300  | 9.71509777432936  | 16.61409544863068 |
| C | 2.72778924903584  | 9.52293302315279  | 12.30958768247510 |
| C | 1.36156945164194  | 9.32503619591662  | 12.53963671166989 |
| H | 1.00351161141161  | 9.14790062597342  | 13.54650150768631 |
| C | 0.45368383747766  | 9.39716359756919  | 11.49151554133428 |
| H | -0.60293480463354 | 9.26509046849285  | 11.69112094499087 |
| C | 0.89450622600274  | 9.67391582266889  | 10.20139393876478 |
| H | 0.18245913120605  | 9.75511699854148  | 9.38893264957246  |
| C | 2.25072009126530  | 9.87024139327500  | 9.96354427776245  |
| H | 2.60117162961412  | 10.10839106329316 | 8.96654076360947  |
| C | 3.16155626015244  | 9.79903178283750  | 11.00949002618544 |
| H | 4.20937550636300  | 9.99083210792808  | 10.81804407041598 |
| C | 5.63203219023868  | 11.64644115592614 | 16.57844532548907 |

|   |                  |                   |                   |
|---|------------------|-------------------|-------------------|
| C | 6.31408703694224 | 10.64369464237876 | 15.87191718746359 |
| C | 6.75631952300997 | 9.48368847084098  | 16.49177417516516 |
| H | 7.25811409022297 | 8.72087767235094  | 15.91040987297034 |
| C | 6.52341660471036 | 9.31195600997347  | 17.85268026177531 |
| H | 6.85793365333619 | 8.40342254140775  | 18.33865938709214 |
| C | 5.85821962891744 | 10.29296047028960 | 18.58007145885347 |
| H | 5.67331915998602 | 10.15675524290432 | 19.63873488679883 |
| C | 5.41390940114663 | 11.44844095759243 | 17.94390298343172 |
| H | 4.86825465967559 | 12.19713217771923 | 18.50429074565395 |
| C | 6.18254672556295 | 13.97742210473530 | 14.93765110507279 |
| C | 5.82890007202840 | 14.96241400411507 | 14.01008237052709 |
| H | 4.79249484922116 | 15.06057547514501 | 13.70460782431185 |
| C | 6.79999726380600 | 15.79050178320128 | 13.46379802507061 |
| H | 6.51663167945083 | 16.55055035300023 | 12.74494373872618 |
| C | 8.13585592105572 | 15.63151303677183 | 13.82560582399184 |
| H | 8.89561780044994 | 16.27186498880929 | 13.39266509235240 |
| C | 8.49367764682031 | 14.64524196642065 | 14.73940696680950 |
| H | 9.53285288440573 | 14.51597558050518 | 15.02016579041884 |
| C | 7.52029045129313 | 13.82194807196653 | 15.29741782277015 |
| H | 7.80191249934443 | 13.05320654065966 | 16.00772898171241 |
| C | 4.11192174541743 | 14.09168752830627 | 16.83707325735762 |
| C | 2.75077512247499 | 14.38579410616798 | 16.74630990691904 |
| H | 2.16082618987411 | 13.91954423206064 | 15.96451187643100 |
| C | 2.16679289319469 | 15.28199778813778 | 17.63766326541188 |
| H | 1.10946576427928 | 15.50614117999020 | 17.55838759836217 |
| C | 2.94057301105725 | 15.88926240230994 | 18.61990797028950 |
| H | 2.48697116743344 | 16.58755879337122 | 19.31392665243060 |
| C | 4.30481735839740 | 15.61218718116215 | 18.70479391960799 |
| H | 4.91141952671690 | 16.09737939588217 | 19.46090027247609 |
| C | 4.88991955109943 | 14.72330609773829 | 17.81328492647847 |
| H | 5.95446940252969 | 14.52437272965238 | 17.86652768082204 |

**[5]<sup>+</sup> - s<sub>0</sub> (s = 0)**

Eh = -4438.471551175498

|    |                    |                   |                   |
|----|--------------------|-------------------|-------------------|
| Cu | 3.47640153525550   | 12.00418134023041 | 14.15877006469101 |
| P  | 3.78455608318137   | 9.77992317141245  | 13.72187797430361 |
| P  | 4.83772176823704   | 12.97657398156522 | 15.62901764633417 |
| N  | 1.41458400003671   | 12.20789741191113 | 14.12429700217054 |
| N  | 3.27146973990182   | 12.76740130876173 | 12.24022555284214 |
| O  | 6.48774995697675   | 10.90572715396495 | 14.50569512052472 |
| C  | 0.52310424630948   | 11.86420415973480 | 15.05333153503809 |
| C  | -0.861011178312571 | 11.96917239774984 | 14.81066153803188 |
| H  | -1.55443523141035  | 11.68667410246562 | 15.59290476085941 |
| C  | -1.31568726432362  | 12.42476677314760 | 13.59803017528964 |
| H  | -2.37793803342380  | 12.51108789927715 | 13.39998614759541 |
| C  | -0.38971779304248  | 12.77566827928037 | 12.59694917170419 |
| C  | 0.97906259598407   | 12.64412455761634 | 12.91185322429883 |
| C  | -0.77784460139936  | 13.22989658931104 | 11.30040374048489 |
| H  | -1.83436654855209  | 13.33200431761834 | 11.08210028581237 |
| C  | 0.15652905390583   | 13.51877643810114 | 10.35618574951190 |
| H  | -0.14052794235360  | 13.85518007592018 | 9.36978921966550  |
| C  | 1.96411044756456   | 12.94617537888414 | 11.91476231453509 |
| C  | 1.54843843264419   | 13.37270629502988 | 10.63683388529525 |
| C  | 2.55645198073846   | 13.61838588331228 | 9.68395778966420  |
| H  | 2.28385011595524   | 13.95316663142562 | 8.68959584234963  |
| C  | 3.87018308959681   | 13.41542796152192 | 10.02252982990182 |
| H  | 4.66124919408964   | 13.58364647529434 | 9.30231648882356  |



|   |                   |                   |                   |
|---|-------------------|-------------------|-------------------|
| C | 4.20957996839667  | 12.97331978245158 | 11.31811148712455 |
| C | 1.03208398930631  | 11.33437243505274 | 16.35683107630655 |
| H | 2.08932791783211  | 11.57107916247851 | 16.47133880633139 |
| H | 0.92341202706520  | 10.24654833354042 | 16.38798344088423 |
| H | 0.47268219229251  | 11.75005058924486 | 17.19684746208552 |
| C | 5.63302734991143  | 12.68797923055166 | 11.67811351781738 |
| H | 5.70679786885414  | 12.39134198680195 | 12.72228095298024 |
| H | 6.26268519213189  | 13.56509213706543 | 11.51534238052150 |
| H | 6.02370670756911  | 11.88102338613716 | 11.05140711564594 |
| C | 5.43161320362024  | 9.19812122524983  | 13.16880358674165 |
| C | 6.58987090625924  | 9.82649051701663  | 13.63551828488925 |
| C | 7.85278516533442  | 9.45054554208099  | 13.20034605005396 |
| H | 8.71804431984048  | 9.98290705228357  | 13.57481627516422 |
| C | 7.97866742331285  | 8.40009439087521  | 12.29917240232205 |
| H | 8.96167065432464  | 8.09966477235949  | 11.95789458645715 |
| C | 6.84356334526571  | 7.73408549622805  | 11.84395244861307 |
| H | 6.93832574040530  | 6.90875906134852  | 11.14923988716796 |
| C | 5.58525463393368  | 8.13300067256212  | 12.27433192104298 |
| H | 4.70521325947421  | 7.62542683463313  | 11.89897758535279 |
| C | 3.28411609852565  | 8.49811190227194  | 14.91972941896283 |
| C | 2.86069845816311  | 7.22680328328666  | 14.51884922569569 |
| H | 2.77384651401641  | 6.99141162049794  | 13.46489490619533 |
| C | 2.53631279162940  | 6.26824498035014  | 15.46973483828056 |
| H | 2.20417322331511  | 5.28674640273108  | 15.15310581538104 |
| C | 2.64110366896426  | 6.56621366481022  | 16.82721716576458 |
| H | 2.38952594125600  | 5.81506832612557  | 17.56638042661899 |
| C | 3.06852980005820  | 7.82631851040151  | 17.23126436701816 |
| H | 3.15695503812037  | 8.06243866422195  | 18.28487823062701 |
| C | 3.38411485926123  | 8.79091678276697  | 16.28067577222248 |
| H | 3.72033483736316  | 9.77104328106335  | 16.59462027577619 |
| C | 2.70900535372860  | 9.51178723719357  | 12.27536853452896 |
| C | 1.34282850161807  | 9.28706232368539  | 12.48009996520603 |
| H | 0.97304408917195  | 9.09139972275022  | 13.47962409346189 |
| C | 0.45474884880067  | 9.32045685085663  | 11.41207053880116 |
| H | -0.59944515042691 | 9.14118472321202  | 11.58684363870510 |
| C | 0.91527042807193  | 9.58551812172010  | 10.12593652494462 |
| H | 0.22179745998561  | 9.61408291157881  | 9.29438798576194  |
| C | 2.27191851004418  | 9.81054560921221  | 9.91345082234388  |
| H | 2.63986543407274  | 10.01496002420325 | 8.91505710067690  |
| C | 3.16286447414264  | 9.77647369734303  | 10.97899644068393 |
| H | 4.21504545348667  | 9.96170341855996  | 10.80324944343005 |
| C | 5.64856441763722  | 11.64873187213053 | 16.57699103178356 |
| C | 6.30924507855006  | 10.64716619147970 | 15.85207266906594 |
| C | 6.76821459309846  | 9.48770346408853  | 16.45990465283176 |
| H | 7.25883504847258  | 8.72466280956803  | 15.86985690695741 |
| C | 6.57344128160079  | 9.31994105643087  | 17.82714758723647 |
| H | 6.92596317328828  | 8.41459780493308  | 18.30564172388236 |
| C | 5.93077284409426  | 10.30175194448284 | 18.57296502317785 |
| H | 5.78188253704001  | 10.16905484247456 | 19.63724838546831 |
| C | 5.46910192227712  | 11.45648880393059 | 17.94874881454554 |
| H | 4.94571369909012  | 12.20887903292595 | 18.52472988575850 |
| C | 6.17883983124580  | 14.00622628013252 | 14.94450116096348 |
| C | 5.79992430151642  | 15.07912205214806 | 14.13132786714652 |
| H | 4.74811179506927  | 15.25884498364740 | 13.93403655520550 |
| C | 6.76247719121167  | 15.91264291501391 | 13.57867725131059 |
| H | 6.46112536153043  | 16.74710458143302 | 12.95648126562475 |
| C | 8.11345252234554  | 15.67338488039627 | 13.82275386131448 |

|   |                  |                   |                   |
|---|------------------|-------------------|-------------------|
| H | 8.86595009500861 | 16.32071709181607 | 13.38877628118044 |
| C | 8.49411745177320 | 14.60611417260042 | 14.62935067083781 |
| H | 9.54364868369364 | 14.42196439356168 | 14.82618925033118 |
| C | 7.53035462095112 | 13.77511867703351 | 15.19324476180143 |
| H | 7.83117764760987 | 12.94940951493471 | 15.82651677372350 |
| C | 4.13922540451748 | 14.09558627852596 | 16.88597072606189 |
| C | 2.77425148646100 | 14.38131466383474 | 16.85021058380937 |
| H | 2.15822379969173 | 13.92344239155696 | 16.08542809816765 |
| C | 2.21643360616044 | 15.26395797991546 | 17.77061420004472 |
| H | 1.15630803256368 | 15.48527776586918 | 17.73419861835065 |
| C | 3.02291331202443 | 15.86674172461517 | 18.72909970727333 |
| H | 2.59107585293719 | 16.55456196658165 | 19.44616973542208 |
| C | 4.39110281529685 | 15.59951596191799 | 18.75930172887707 |
| H | 5.02184625599679 | 16.08201133631056 | 19.49626781025650 |
| C | 4.94948281750448 | 14.72425068010677 | 17.83814901281528 |
| H | 6.01662397849538 | 14.53409963526109 | 17.84965954045494 |

**[5]<sup>+</sup> - T<sub>1</sub> (S = 2)**

Eh = -4438.387213389165

|    |                   |                   |                   |
|----|-------------------|-------------------|-------------------|
| Cu | 3.37102446610548  | 11.96932691307158 | 13.86719299072590 |
| P  | 3.61881160963965  | 9.65263702506924  | 13.91419074616021 |
| P  | 4.88623217324836  | 12.78560733935232 | 15.43614569751758 |
| N  | 1.41785964463859  | 12.24661157776715 | 13.59045321024186 |
| N  | 3.57108709805492  | 13.10017559510842 | 12.23213456760196 |
| O  | 6.42886838399564  | 10.69119816768285 | 14.34638444067247 |
| C  | 0.33110092632503  | 11.80314833980381 | 14.28334022977083 |
| C  | -0.94889117295575 | 12.22156128628572 | 13.97300184631241 |
| H  | -1.77511238859925 | 11.83986092405599 | 14.55827547743823 |
| C  | -1.17648166265484 | 13.10629070057488 | 12.90807829970617 |
| H  | -2.18130564440115 | 13.41730625525922 | 12.64983793824979 |
| C  | -0.08925771467191 | 13.57754724051323 | 12.17801872418347 |
| C  | 1.21107370410179  | 13.13287165333291 | 12.54008492754797 |
| C  | -0.21096503920413 | 14.48251026108185 | 11.07488619730616 |
| H  | -1.20226713283419 | 14.82790471855418 | 10.80425768016993 |
| C  | 0.87741828552829  | 14.89436977990483 | 10.37248559692105 |
| H  | 0.76447531778980  | 15.55770759079152 | 9.52336673592405  |
| C  | 2.32997943605295  | 13.57711784631375 | 11.83322258969145 |
| C  | 2.19134806172158  | 14.45132435225677 | 10.71958848452608 |
| C  | 3.33921410479128  | 14.79954276452143 | 10.01278409254340 |
| H  | 3.26940965828072  | 15.47477498481460 | 9.16820489749159  |
| C  | 4.56675185950549  | 14.24147173216103 | 10.38103124920137 |
| H  | 5.46547152844479  | 14.45592934700276 | 9.81760203283545  |
| C  | 4.65335176999514  | 13.38940003201218 | 11.47652716109896 |
| C  | 0.56134672000629  | 10.85497388904519 | 15.41402704600555 |
| H  | 1.19570205479511  | 11.30848888859371 | 16.18060674954825 |
| H  | 1.05128834506737  | 9.94235270809959  | 15.07156652731094 |
| H  | -0.38477250377765 | 10.57752627088785 | 15.87688514306282 |
| C  | 5.94075598619671  | 12.69973937638784 | 11.79889029320526 |
| H  | 5.94035812613572  | 12.31976990568888 | 12.81567311169307 |
| H  | 6.79294571471003  | 13.36698057114366 | 11.66906812917603 |
| H  | 6.06916826365070  | 11.84829450751481 | 11.12222239525188 |
| C  | 5.14331968182963  | 9.10676561831633  | 13.06965118344658 |
| C  | 6.38180735692690  | 9.63901949456358  | 13.43990079904417 |
| C  | 7.56050665446775  | 9.23432717857310  | 12.83582230482680 |
| H  | 8.49361295175828  | 9.69136017779215  | 13.13994357637303 |
| C  | 7.51478704679897  | 8.26588556624870  | 11.83760646727465 |
| H  | 8.43195589474561  | 7.94539395453024  | 11.35934589992430 |

|   |                   |                   |                   |
|---|-------------------|-------------------|-------------------|
| C | 6.29452879960674  | 7.72320659865443  | 11.44743012943952 |
| H | 6.25580122454172  | 6.97702674856557  | 10.66379858578566 |
| C | 5.11752172794490  | 8.14438500956018  | 12.05539127495490 |
| H | 4.16657002167890  | 7.73618744799489  | 11.73715127837680 |
| C | 3.56645481666952  | 8.59934790430031  | 15.39437756683929 |
| C | 3.89968050483199  | 7.24312651787527  | 15.30265543540590 |
| H | 4.19898638581383  | 6.82073721663998  | 14.35094396797127 |
| C | 3.85403538435596  | 6.43880038859475  | 16.43303017439669 |
| H | 4.10752317327936  | 5.38832587939254  | 16.35681682250731 |
| C | 3.48408700515997  | 6.98189593471102  | 17.66157498682372 |
| H | 3.45197970385321  | 6.35286957764348  | 18.54298742736127 |
| C | 3.16688486239775  | 8.33243234254384  | 17.75881099062002 |
| H | 2.89588554572831  | 8.76148089663546  | 18.71548407522311 |
| C | 3.21062693661150  | 9.14060484520157  | 16.62938079735324 |
| H | 2.98443749053674  | 10.19469797369658 | 16.70951229710085 |
| C | 2.29481324521126  | 9.08745454907242  | 12.80897906432023 |
| C | 1.39004943374681  | 8.08405440648903  | 13.15430462248099 |
| H | 1.50646749207203  | 7.54388205986162  | 14.08592342201987 |
| C | 0.32771256808724  | 7.78792080603279  | 12.30456106827692 |
| H | -0.37649465289646 | 7.01144448486144  | 12.57744606371736 |
| C | 0.16780312623687  | 8.48982417572901  | 11.11428933649268 |
| H | -0.66599630919763 | 8.26799173084049  | 10.45980190609728 |
| C | 1.07543407875787  | 9.48753150404496  | 10.76385461635873 |
| H | 0.94963638120595  | 10.04147988916342 | 9.84169040215705  |
| C | 2.13105140683404  | 9.79069577436435  | 11.60861356689779 |
| H | 2.81974611387261  | 10.58763040310237 | 11.35082409357744 |
| C | 5.67613526110362  | 11.47999846144838 | 16.41495588582609 |
| C | 6.30281664367593  | 10.45344116528141 | 15.70118561740622 |
| C | 6.79483383426136  | 9.31763894504565  | 16.32472078494517 |
| H | 7.25311963895926  | 8.53078234116188  | 15.73961445526482 |
| C | 6.67675227328222  | 9.21620203964773  | 17.70653326255236 |
| H | 7.05254004714627  | 8.33294462147419  | 18.20767912036220 |
| C | 6.08273543317453  | 10.23604950847261 | 18.44551447974028 |
| H | 6.00063067990943  | 10.14905889343111 | 19.52149015653431 |
| C | 5.57542733328197  | 11.35857167436898 | 17.80288386948045 |
| H | 5.08221152870789  | 12.13573447341362 | 18.37261340891402 |
| C | 6.19651519237814  | 13.88799622040275 | 14.84477401986222 |
| C | 5.80320253117475  | 15.04541626617551 | 14.16304458807577 |
| H | 4.75049239429806  | 15.26402312182621 | 14.02572350201929 |
| C | 6.76273590081503  | 15.90972299564168 | 13.65664640908753 |
| H | 6.45507419173696  | 16.80385228246631 | 13.12843874900235 |
| C | 8.11661658607265  | 15.62393607754350 | 13.82375441197842 |
| H | 8.86491012202513  | 16.29857501031577 | 13.42572795932909 |
| C | 8.50836460245539  | 14.47551523717018 | 14.50490943406873 |
| H | 9.56055936271994  | 14.25841900407650 | 14.64402796710616 |
| C | 7.55121648106138  | 13.60472396677419 | 15.01484941912582 |
| H | 7.85760575575877  | 12.71225979794213 | 15.54590796839303 |
| C | 3.97398859063642  | 13.82163727410306 | 16.61537054835303 |
| C | 2.58041381780299  | 13.86589920004891 | 16.55808862263028 |
| H | 2.05586498297764  | 13.30481626085325 | 15.79362581070610 |
| C | 1.86893776247160  | 14.65899117305189 | 17.45257735363952 |
| H | 0.78775137841665  | 14.69466072564139 | 17.39769847991384 |
| C | 2.54951856104294  | 15.41101632479916 | 18.40363721606492 |
| H | 1.99735922037738  | 16.03060055901041 | 19.10000239237311 |
| C | 3.94267428899318  | 15.38489914808003 | 18.45250627570447 |
| H | 4.47167491991048  | 15.98474675464576 | 19.18317000364110 |
| C | 4.65698211572690  | 14.59996735988013 | 17.55778842110226 |

H 5.74043353449366 14.59734451555351 17.58065199425623

**[6]<sup>2+</sup> - D<sup>∞</sup> (S = 1)**

Eh = -4595.49037254323

|    |                   |                   |                   |
|----|-------------------|-------------------|-------------------|
| Cu | 3.47415494985438  | 11.95887612890035 | 14.04691396853444 |
| P  | 3.79171249266927  | 9.66994480714310  | 13.80121242212776 |
| F  | 4.99211647200609  | 12.84870510032281 | 15.54304270062479 |
| N  | 1.39801339440569  | 12.08092585104696 | 14.02877610908290 |
| N  | 3.271111198964417 | 12.84898415005295 | 12.19304995025235 |
| O  | 6.51860434358100  | 10.76378226606939 | 14.46865395156110 |
| C  | 0.50409249247815  | 11.71406496175790 | 14.95238927784582 |
| C  | -0.87823168271855 | 11.84728465431664 | 14.70725997709138 |
| H  | -1.57836065391466 | 11.55463417847439 | 15.47811286824813 |
| C  | -1.32750799049163 | 12.32898045375904 | 13.50615641689024 |
| H  | -2.38909951971586 | 12.42076347932182 | 13.30730161352677 |
| C  | -0.39885281709550 | 12.70707082431862 | 12.51542035195538 |
| C  | 0.96923883303609  | 12.57806604206210 | 12.83183005602951 |
| C  | -0.79554128640232 | 13.19512693493683 | 11.23628317824701 |
| H  | -1.85312170469009 | 13.28828027595140 | 11.02093161938610 |
| C  | 0.13680809423816  | 13.53012853675336 | 10.30481000001004 |
| H  | -0.16082193549404 | 13.88984074477611 | 9.32724597273656  |
| C  | 1.95174763384383  | 12.96218699534448 | 11.86189420643760 |
| C  | 1.52742567770048  | 13.41626776266890 | 10.59635351877449 |
| C  | 2.52915223126383  | 13.72365427400432 | 9.65285437320451  |
| H  | 2.24603260368635  | 14.07275405766148 | 8.66645225186200  |
| C  | 3.84715535389919  | 13.57015987063073 | 9.99122300709514  |
| H  | 4.62774912238827  | 13.79547136634967 | 9.27693095309510  |
| C  | 4.20709573042855  | 13.13365472381875 | 11.28371551696316 |
| C  | 0.97786468585481  | 11.14913055015675 | 16.26647374747458 |
| H  | 2.07024404523877  | 11.08928357526886 | 16.20836817589767 |
| C  | 5.65914096253253  | 12.98651088803099 | 11.64851107285838 |
| H  | 5.69691991691547  | 12.72905352675089 | 12.70983129094980 |
| C  | 5.39208092357594  | 9.11551336242990  | 13.13859332238380 |
| C  | 6.58186130418297  | 9.69076037273294  | 13.58814347826388 |
| C  | 7.81635287865528  | 9.27817828196488  | 13.11439043426311 |
| H  | 8.71424990896344  | 9.76313953235549  | 13.47591223707874 |
| C  | 7.87325243713700  | 8.25145891898904  | 12.17783390159339 |
| H  | 8.83348875273806  | 7.92200981014671  | 11.80125755080899 |
| C  | 6.70151723292852  | 7.64780619891010  | 11.72785076858267 |
| H  | 6.74719263670336  | 6.84372089865354  | 11.00442885285035 |
| C  | 5.46941551328348  | 8.07565842899083  | 12.20345580355857 |
| H  | 4.56178033377824  | 7.60925303858316  | 11.84209465709869 |
| C  | 3.35126400864529  | 8.45431567501871  | 15.06780150569436 |
| C  | 2.90522544029269  | 7.18191346042444  | 14.68597508852137 |
| H  | 2.75990967702773  | 6.94257162006908  | 13.63985991101644 |
| C  | 2.64314661548517  | 6.22390360644730  | 15.65519954512753 |
| H  | 2.29449381642489  | 5.24233995277909  | 15.35877740388481 |
| C  | 2.83449055648829  | 6.52172746116061  | 17.00338266814119 |
| H  | 2.63049903976882  | 5.76971380428219  | 17.75563633553162 |
| C  | 3.28819919322048  | 7.78044977939523  | 17.38170320788830 |
| H  | 3.44155880738455  | 8.01359644929620  | 18.42812167299226 |
| C  | 3.54411984644919  | 8.74794107557697  | 16.41788784718068 |
| H  | 3.89541606223965  | 9.72578225698255  | 16.71757053178782 |
| C  | 2.61405463228682  | 9.47326972090405  | 12.44033621715061 |
| C  | 1.27554089167459  | 9.15398801963962  | 12.70888383064442 |
| H  | 0.97109067542611  | 8.90326709788021  | 13.71558966463260 |

|   |                   |                   |                   |
|---|-------------------|-------------------|-------------------|
| C | 0.33858921772502  | 9.14942700627202  | 11.68696292492148 |
| H | -0.68979019458679 | 8.88829686393601  | 11.90382115421039 |
| C | 0.71976739228028  | 9.47290957638474  | 10.38591027851303 |
| H | -0.01354837953770 | 9.46658245633920  | 9.58897654613543  |
| C | 2.04628517599220  | 9.79617345632223  | 10.11043113392904 |
| H | 2.34892094613634  | 10.04050985088009 | 9.09977174540267  |
| C | 2.98709712203280  | 9.80419935986851  | 11.12952901697607 |
| H | 4.01338925816723  | 10.06218298096063 | 10.90753952738005 |
| C | 5.70489310123892  | 11.51498642876151 | 16.53103725574445 |
| C | 6.37112850058313  | 10.50972123922486 | 15.82131710885561 |
| C | 6.85153539169762  | 9.37019410918930  | 16.44561154992908 |
| H | 7.34978069204578  | 8.60016164707044  | 15.87119797888137 |
| C | 6.67142134160676  | 9.23876609611098  | 17.81941380626950 |
| H | 7.04698951816156  | 8.35486454466940  | 18.31953851739187 |
| C | 6.01324955558393  | 10.22521178899676 | 18.54938654324495 |
| H | 5.87804807075740  | 10.11227490829699 | 19.61741258865701 |
| C | 5.52315104690893  | 11.35675164902447 | 17.90770260562486 |
| H | 4.98456033819371  | 12.10793081254716 | 18.46994182055726 |
| C | 6.35551554397055  | 13.92656093587632 | 15.00667010654263 |
| C | 6.03440084174945  | 15.25004539611732 | 14.67122608037378 |
| H | 5.00217073172115  | 15.57898796090302 | 14.68095822541106 |
| C | 7.03997870755818  | 16.15484991956601 | 14.36544480472939 |
| H | 6.78594106912983  | 17.17975819848228 | 14.12477300281884 |
| C | 8.37180916961013  | 15.74758607544280 | 14.37785391334492 |
| H | 9.15735692296298  | 16.45591641523192 | 14.14535711272405 |
| C | 8.69409721040211  | 14.43119911181451 | 14.69934410379192 |
| H | 9.73035539893901  | 14.11715171407973 | 14.72475000114567 |
| C | 7.69311692820212  | 13.51982581021734 | 15.01178824651680 |
| H | 7.95835080831081  | 12.50936473235959 | 15.28689933251668 |
| C | 4.08541035871575  | 13.98825495068691 | 16.62455441616413 |
| C | 2.82993807578265  | 14.44448851131644 | 16.22041119372948 |
| H | 2.35816460588078  | 14.01991690187366 | 15.34164362396722 |
| C | 2.18860595699082  | 15.45532912696063 | 16.92994871276919 |
| H | 1.21957486715916  | 15.81346413557490 | 16.60417170331469 |
| C | 2.79412307077342  | 16.00306233394289 | 18.05433228974361 |
| H | 2.29596999831242  | 16.78760775779077 | 18.61041091723180 |
| C | 4.05157558434271  | 15.55602086567568 | 18.45939902348398 |
| H | 4.53059521098740  | 15.99518251451345 | 19.32577636662738 |
| C | 4.70698940454357  | 14.56771570697707 | 17.73938955329726 |
| H | 5.70793757922927  | 14.26867073376899 | 18.02616738489493 |
| C | 0.58903594993860  | 12.06233423457049 | 17.44059414139091 |
| H | -0.49675165656801 | 12.11925211428011 | 17.54419981077300 |
| H | 0.98846959720150  | 11.64669962732644 | 18.36759064909970 |
| H | 0.97870471626569  | 13.07130262671691 | 17.32211222656309 |
| C | 0.40027116335853  | 9.74615872286514  | 16.50847466940388 |
| H | 0.69845990955141  | 9.03424600050213  | 15.73962828825183 |
| H | 0.75380105582244  | 9.36595052774909  | 17.46698900462128 |
| H | -0.69032109685026 | 9.77856486301328  | 16.54709686007409 |
| C | 6.41264771588897  | 14.30516485062477 | 11.42346236109822 |
| H | 7.41073741091868  | 14.23279999779718 | 11.85665875390514 |
| H | 6.52372769609379  | 14.51420719431909 | 10.35724786226476 |
| H | 5.89960773987694  | 15.14620559495891 | 11.88775394732813 |
| C | 6.33089934009268  | 11.86209250817842 | 10.84496950638686 |
| H | 7.38482907358696  | 11.80164580906190 | 11.12103000283972 |
| H | 5.88022691988674  | 10.88905784663098 | 11.04027922759042 |
| H | 6.27729484677035  | 12.06061141311313 | 9.77235170720397  |

[6]<sup>0</sup> - D<sup>red</sup> (S = 1)

Eh = -4595.932493053311

|    |                   |                   |                   |
|----|-------------------|-------------------|-------------------|
| Cu | 3.47448213288617  | 12.02106822380316 | 14.08262781303719 |
| P  | 3.78449303926435  | 9.76601439161998  | 13.72122116260418 |
| F  | 4.86592263741428  | 12.94947150531715 | 15.54367467154002 |
| N  | 1.43440137234116  | 12.16774661343344 | 14.14058835472047 |
| N  | 3.26086738401260  | 12.69028553809614 | 12.17076732719044 |
| O  | 6.51558188108213  | 10.84600076072936 | 14.49714274988357 |
| C  | 0.52742496502117  | 11.86749390125130 | 15.09315579799456 |
| C  | -0.83808790420015 | 12.03253407827752 | 14.89863080518668 |
| H  | -1.52247054845035 | 11.78597698607469 | 15.70046517945707 |
| C  | -1.32136990346099 | 12.48131878747378 | 13.66060433275299 |
| H  | -2.38533207332148 | 12.59874799116967 | 13.48729732864506 |
| C  | -0.42050798308781 | 12.74484392169854 | 12.63575080582653 |
| C  | 0.97369277794793  | 12.59074991132035 | 12.89644475403933 |
| C  | -0.83056711091056 | 13.13773893439620 | 11.32071392754423 |
| H  | -1.89248870010758 | 13.25597823672754 | 11.13065657388333 |
| C  | 0.07396045356195  | 13.34108912966658 | 10.32958868321393 |
| H  | -0.25222334862670 | 13.62235338345631 | 9.33347022619530  |
| C  | 1.91103640352683  | 12.82845321523784 | 11.87666938414090 |
| C  | 1.47611082376031  | 13.18690499352111 | 10.56479619395324 |
| C  | 2.43529962800302  | 13.35214861647257 | 9.57262510338623  |
| H  | 2.12658004636116  | 13.61065420732562 | 8.56540475860860  |
| C  | 3.78743164755736  | 13.18234872653348 | 9.88625508886112  |
| H  | 4.55138884649759  | 13.31546873169660 | 9.13096978021099  |
| C  | 4.16076725082114  | 12.86886313914285 | 11.19273585530225 |
| C  | 1.03996951712055  | 11.26650859512286 | 16.38510602561450 |
| H  | 2.13163266532876  | 11.22856557572932 | 16.29152979527736 |
| C  | 5.62202091970495  | 12.77543638835898 | 11.57113868716113 |
| H  | 5.64661624161889  | 12.48624401767706 | 12.62610273892549 |
| C  | 5.42547460703844  | 9.16112254933799  | 13.15106354723117 |
| C  | 6.59332038876112  | 9.76395239297299  | 13.62796130875209 |
| C  | 7.85201858323862  | 9.37030606628930  | 13.19497012628899 |
| H  | 8.72304774005821  | 9.88815590449639  | 13.57678032398307 |
| C  | 7.96622670240100  | 8.33306802751088  | 12.27786878860907 |
| H  | 8.94579532343220  | 8.02430693417097  | 11.93317113257554 |
| C  | 6.82162757537058  | 7.69513218826852  | 11.80759981175357 |
| H  | 6.90419065111358  | 6.88216609728901  | 11.09627478357065 |
| C  | 5.56878948175908  | 8.10704599873873  | 12.24268937765554 |
| H  | 4.68034478329365  | 7.62243910304490  | 11.85706590238656 |
| C  | 3.34424229972687  | 8.41909397084712  | 14.88666984620355 |
| C  | 2.88781417899468  | 7.17102049933386  | 14.45070788820124 |
| H  | 2.71959750559714  | 6.99848291742533  | 13.39454985902821 |
| C  | 2.62994083852515  | 6.15950594615614  | 15.36683794761960 |
| H  | 2.26927895960716  | 5.19796357897630  | 15.01977185255671 |
| C  | 2.83718626767887  | 6.37862217784407  | 16.72736453159488 |
| H  | 2.63681799746269  | 5.58744802141986  | 17.44066562893988 |
| C  | 3.29306394486589  | 7.61607015516649  | 17.16645642360120 |
| H  | 3.45033672193458  | 7.79856829991888  | 18.22302654074148 |
| C  | 3.53645403575591  | 8.63407105707859  | 16.25109896651883 |
| H  | 3.87270556301379  | 9.60206084726370  | 16.59914391190652 |
| C  | 2.67810984359093  | 9.48027419710108  | 12.29981601043584 |
| C  | 1.31414609151823  | 9.29725329194656  | 12.55390136862494 |
| H  | 0.96806344927957  | 9.15856196988542  | 13.56993623915532 |

|   |                   |                   |                   |
|---|-------------------|-------------------|-------------------|
| C | 0.39120405501894  | 9.33163445236330  | 11.51748984560678 |
| H | -0.66255977580376 | 9.21150508639143  | 11.73831324812840 |
| C | 0.81443933686832  | 9.55442266898213  | 10.21138779871056 |
| H | 0.09163817591768  | 9.60515219166009  | 9.40601693585317  |
| C | 2.16772011306700  | 9.73589432422874  | 9.94855828955764  |
| H | 2.50649957711543  | 9.93298164635584  | 8.93873038304158  |
| C | 3.09265009150219  | 9.70430198090285  | 10.98420422060647 |
| H | 4.13595297167689  | 9.88602198737447  | 10.76710468118630 |
| C | 5.60996190954906  | 11.61094893755133 | 16.53562950775580 |
| C | 6.29259203155588  | 10.60223885827340 | 15.83864963520653 |
| C | 6.74028241940312  | 9.45043740156289  | 16.47032064882837 |
| H | 7.24754671263420  | 8.68529273406232  | 15.89695537722518 |
| C | 6.49948149472442  | 9.28706044804146  | 17.83035945182839 |
| H | 6.83712350663376  | 8.38459774211054  | 18.32527548710123 |
| C | 5.81461186052830  | 10.26480999910793 | 18.54409491660487 |
| H | 5.61544403564919  | 10.13122890524870 | 19.60047432957984 |
| C | 5.37172941034999  | 11.41514774018736 | 17.89767929635810 |
| H | 4.81133801060252  | 12.16009031652712 | 18.44815566004817 |
| C | 6.28918325356909  | 14.01018785061214 | 15.06873011781093 |
| C | 5.99200582287192  | 15.29736524852738 | 14.60699376415935 |
| H | 4.95793251207220  | 15.61426935392443 | 14.52927570274087 |
| C | 7.00843006931691  | 16.17649813572805 | 14.26124271674918 |
| H | 6.76096998582698  | 17.17153481626161 | 13.91009327937928 |
| C | 8.33917425587113  | 15.77775032183924 | 14.35481396273680 |
| H | 9.13363620591664  | 16.46146215297241 | 14.07964000355906 |
| C | 8.64221096900567  | 14.49839708400797 | 14.80746843083200 |
| H | 9.67580986038326  | 14.18202643316753 | 14.89092352435591 |
| C | 7.62450466757052  | 13.62010614096479 | 15.16891533163940 |
| H | 7.87712198316264  | 12.63695127039105 | 15.54182654399403 |
| C | 4.09464211685896  | 14.10344952127820 | 16.73366041820201 |
| C | 2.80766238688983  | 14.55168561962778 | 16.43688755345011 |
| H | 2.28214017490081  | 14.11856376833860 | 15.59185473866758 |
| C | 2.21338003198848  | 15.54536057037584 | 17.21154487200737 |
| H | 1.21583498568343  | 15.89180785155745 | 16.96784671759141 |
| C | 2.89777168318988  | 16.08428466622028 | 18.29374408045902 |
| H | 2.43579196505885  | 16.85515892143796 | 18.89972081569849 |
| C | 4.18649446362797  | 15.64247694849507 | 18.59437436846891 |
| H | 4.72640245385800  | 16.07243453263672 | 19.43020703904478 |
| C | 4.78849739247408  | 14.66870205810916 | 17.81018285265224 |
| H | 5.80758646642942  | 14.36237684732588 | 18.01705747203345 |
| C | 0.66890662391718  | 12.09527734074584 | 17.62076436836715 |
| H | -0.41655984651454 | 12.13670028209322 | 17.74427367762884 |
| H | 1.09014839160388  | 11.63530890107774 | 18.51949140070586 |
| H | 1.04328740328656  | 13.11512803612812 | 17.55409507330945 |
| C | 0.50070812030988  | 9.83943182743351  | 16.56099727607567 |
| H | 0.76156915884428  | 9.19830727815367  | 15.71908465383343 |
| H | 0.91069547419395  | 9.38520512109099  | 17.46598105327604 |
| H | -0.58816901523532 | 9.85685162182520  | 16.65169214380973 |
| C | 6.29635753654186  | 14.14597117904814 | 11.41985174388632 |
| H | 7.29126645561197  | 14.13228632627752 | 11.87122491587355 |
| H | 6.39915595393898  | 14.40849402339326 | 10.36328096624744 |
| H | 5.71272959891602  | 14.92559155335113 | 11.90774768117150 |
| C | 6.39009983199742  | 11.73180164579185 | 10.75299144960409 |
| H | 7.44103566089730  | 11.72419647267825 | 11.05307170388600 |
| H | 5.99696453128077  | 10.72588605889741 | 10.90170844858932 |
| H | 6.34586902320481  | 11.96350842346778 | 9.68570962318275  |

[6]<sup>+</sup> - S<sub>0</sub> (S = 0)

Eh = -4595.808419331483

|    |                   |                   |                   |
|----|-------------------|-------------------|-------------------|
| Cu | 3.49680396390942  | 11.98248111300488 | 14.10089584461542 |
| P  | 3.76907549669182  | 9.73899335054351  | 13.69324615804376 |
| F  | 4.87542442701416  | 12.95943462663394 | 15.57485622211605 |
| N  | 1.40880706442856  | 12.16153419139120 | 14.10934418517278 |
| N  | 3.24596934289350  | 12.70557214767503 | 12.17215847475036 |
| O  | 6.47374121608603  | 10.85001940308962 | 14.47257962966393 |
| C  | 0.52307312190502  | 11.85206376528687 | 15.05805232275768 |
| C  | -0.86079039139264 | 12.01385279874550 | 14.84335289421443 |
| H  | -1.54799975191163 | 11.77696101936245 | 15.64501963434260 |
| C  | -1.32690621187684 | 12.45008613590485 | 13.63050399776817 |
| H  | -2.38960256924330 | 12.56784202656012 | 13.45137536383111 |
| C  | -0.41238363227774 | 12.72572135638625 | 12.59670305056335 |
| C  | 0.96035943429361  | 12.57729487385110 | 12.89108124725154 |
| C  | -0.82571339038300 | 13.11748333682450 | 11.28860812816086 |
| H  | -1.88580388593894 | 13.22656587748262 | 11.09189221024298 |
| C  | 0.08929510067458  | 13.33281821193482 | 10.30787607052818 |
| H  | -0.22382565859013 | 13.61558967036786 | 9.30968280958249  |
| C  | 1.92774652624007  | 12.83431495322930 | 11.86198687161789 |
| C  | 1.48394511729135  | 13.18984800945274 | 10.57018457243810 |
| C  | 2.46802135723965  | 13.38127023270991 | 9.58171994210847  |
| H  | 2.16943252489216  | 13.64454541643689 | 8.57334622955299  |
| C  | 3.79061782677927  | 13.23291353913981 | 9.90850708137437  |
| H  | 4.56198309949668  | 13.37902215032678 | 9.16352416404799  |
| C  | 4.16490041230350  | 12.90172909972424 | 11.22679813328061 |
| C  | 1.01613570508060  | 11.26380136053878 | 16.35607701479277 |
| H  | 2.10798268749162  | 11.22053544100309 | 16.27981370390600 |
| C  | 5.61977901373414  | 12.80975325727647 | 11.60651517096884 |
| H  | 5.64679970625099  | 12.52884952547497 | 12.66292375783949 |
| C  | 5.41095057071552  | 9.14967071074746  | 13.13234197299695 |
| C  | 6.57208772691773  | 9.76383354061319  | 13.61013110546937 |
| C  | 7.83418517800103  | 9.37069407850124  | 13.18881332174152 |
| H  | 8.70312858751019  | 9.89041013276037  | 13.57258562188518 |
| C  | 7.95563244952055  | 8.32382508715992  | 12.28321063687298 |
| H  | 8.93781888196564  | 8.01283981125326  | 11.94923425960485 |
| C  | 6.81656375362646  | 7.67464249143067  | 11.81394969535184 |
| H  | 6.90762075596910  | 6.85162305240346  | 11.11603722968638 |
| C  | 5.55939678676279  | 8.08390508931851  | 12.23813431709637 |
| H  | 4.67654650133430  | 7.58334796698523  | 11.86001318111182 |
| C  | 3.31783739065746  | 8.43723494962599  | 14.89338594045183 |
| C  | 2.84843981404112  | 7.18442476368626  | 14.48484852780200 |
| H  | 2.68169891933677  | 6.98484667171192  | 13.43329901810067 |
| C  | 2.58147073127197  | 6.19802430986960  | 15.42511151414841 |
| H  | 2.21081844127979  | 5.23269903392539  | 15.10156572851431 |
| C  | 2.79755479921583  | 6.44584805288096  | 16.77928463279270 |
| H  | 2.59318928424656  | 5.67270025817286  | 17.51025308594698 |
| C  | 3.27334938841104  | 7.68591580181133  | 17.18937889421611 |
| H  | 3.44421005137597  | 7.88586484147143  | 18.24035381765513 |
| C  | 3.52391380675905  | 8.68136200819200  | 16.25181077568389 |
| H  | 3.88238771428581  | 9.64889179872549  | 16.57870540780482 |
| C  | 2.66495201780067  | 9.45275457009856  | 12.26931699804783 |
| C  | 1.30064182667284  | 9.25078054985531  | 12.50947380506787 |
| H  | 0.94940899036639  | 9.09543771647952  | 13.52181965461803 |



|   |                   |                   |                   |
|---|-------------------|-------------------|-------------------|
| C | 0.38846720312541  | 9.25532726778689  | 11.46210484683945 |
| H | -0.66305222601339 | 9.09480147167852  | 11.66814033847516 |
| C | 0.82207332546841  | 9.46871884175778  | 10.15717394540728 |
| H | 0.11035872660613  | 9.47503921935993  | 9.34069627081815  |
| C | 2.17546597009028  | 9.67095699070883  | 9.90809836823352  |
| H | 2.52434488960453  | 9.83670817122477  | 8.89582499623169  |
| C | 3.08974800099854  | 9.66650266737498  | 10.95450124180051 |
| H | 4.13673707164675  | 9.83726185843985  | 10.74444688842749 |
| C | 5.62886334022674  | 11.60691372990502 | 16.53845392975744 |
| C | 6.29743388374222  | 10.60385356665429 | 15.82280516600431 |
| C | 6.76448367614084  | 9.45256169012688  | 16.44018911900224 |
| H | 7.26437029815031  | 8.69053564426639  | 15.85671379382793 |
| C | 6.55868564185710  | 9.28788624118357  | 17.80572740310798 |
| H | 6.91700645315919  | 8.38886393892520  | 18.29170854616502 |
| C | 5.88869390320766  | 10.26119980132921 | 18.53868207802947 |
| H | 5.72202141873795  | 10.12724453676092 | 19.60023031885052 |
| C | 5.42550095517113  | 11.41083272765648 | 17.90619466422555 |
| H | 4.88138729219770  | 12.15456915156809 | 18.47377872545376 |
| C | 6.27964729811247  | 14.02205786809539 | 15.05642255779999 |
| C | 5.97146793985980  | 15.32198267922798 | 14.64051697352697 |
| H | 4.93792804002898  | 15.64930491138172 | 14.61467392900018 |
| C | 6.98080333857506  | 16.20650233288774 | 14.28664311040211 |
| H | 6.72884253167439  | 17.21397993840691 | 13.97756252394662 |
| C | 8.31176124488121  | 15.79976037864049 | 14.33020707122308 |
| H | 9.10058893457297  | 16.48923629562255 | 14.05473953653605 |
| C | 8.62419615084650  | 14.50814399976327 | 14.73892101049853 |
| H | 9.65869376525030  | 14.18905898839786 | 14.78744021616832 |
| C | 7.61470114453985  | 13.62262170531229 | 15.10670807581877 |
| H | 7.87494943329531  | 12.63086732247960 | 15.44955268647960 |
| C | 4.11800343024599  | 14.09924064156548 | 16.77937575880718 |
| C | 2.83412211073126  | 14.57137946030401 | 16.50815823049100 |
| H | 2.29555722922894  | 14.17047945208961 | 15.65674292352486 |
| C | 2.26117761667612  | 15.55673255223571 | 17.30841838392459 |
| H | 1.26706532399004  | 15.92523848773457 | 17.08415468490896 |
| C | 2.96669047880643  | 16.06544993955533 | 18.39183288369541 |
| H | 2.52278448078373  | 16.83015247078177 | 19.01784218245362 |
| C | 4.25446260720658  | 15.60415804915849 | 18.66466252015476 |
| H | 4.81130103064176  | 16.01320507699997 | 19.49917444109057 |
| C | 4.834634644430190 | 14.63851403764078 | 17.85477636368874 |
| H | 5.85336177854218  | 14.31977283174815 | 18.04194287506163 |
| C | 0.62265615487184  | 12.11006115586793 | 17.57405461723329 |
| H | -0.46390455059114 | 12.15037357169092 | 17.68607673381409 |
| H | 1.03101209495234  | 11.65573611229611 | 18.47937259619520 |
| H | 1.00143680818412  | 13.12787465555717 | 17.50503807869613 |
| C | 0.46105905739735  | 9.84035528720015  | 16.52596979840185 |
| H | 0.74357918132854  | 9.18826603809050  | 15.69991761381978 |
| H | 0.84768358244598  | 9.39978565334306  | 17.44557407014511 |
| H | -0.62935296401240 | 9.86022108533706  | 16.59483880971460 |
| C | 6.29074783545489  | 14.18126964984667 | 11.43821544798525 |
| H | 7.28763447303141  | 14.15985812823014 | 11.88103632885009 |
| H | 6.39040767466381  | 14.43746512556242 | 10.38012382280806 |
| H | 5.71985058512435  | 14.96682077428585 | 11.93112505647784 |
| C | 6.37770411854939  | 11.75709775865071 | 10.78814488414295 |
| H | 7.42747685663505  | 11.75275740781665 | 11.08645522178472 |
| H | 5.98447584873024  | 10.75329983350057 | 10.94669250331284 |
| H | 6.33566198719730  | 11.98293096794679 | 9.71963703055586  |

[6]<sup>+</sup> - T<sub>1</sub> (S = 2)

Eh = -4595.719742787328

|    |                   |                   |                   |
|----|-------------------|-------------------|-------------------|
| Cu | 3.42767881040591  | 12.00539085492498 | 14.02113063856509 |
| P  | 3.70321332447700  | 9.66554278261454  | 13.84775542776740 |
| P  | 5.00236251207191  | 12.94311658925859 | 15.45783001280449 |
| N  | 1.44259266138595  | 12.02834094757814 | 14.01577259228344 |
| N  | 3.27078467929252  | 12.91824687355282 | 12.24445902398369 |
| O  | 6.46809314653673  | 10.78118095157154 | 14.45852502757024 |
| C  | 0.54021347087500  | 11.58532749375286 | 14.93146034189916 |
| C  | -0.82015521652372 | 11.64838982163653 | 14.68382762454689 |
| H  | -1.50795872294576 | 11.30420863921893 | 15.44432823015218 |
| C  | -1.30642962143571 | 12.13053151581884 | 13.45940600719047 |
| H  | -2.37007314501663 | 12.14737340801722 | 13.25465133057379 |
| C  | -0.40479669616299 | 12.57837661121797 | 12.49905990792516 |
| C  | 0.98237462254573  | 12.53153046236158 | 12.80479290762300 |
| C  | -0.79670755111715 | 13.07256616547637 | 11.21565722167385 |
| H  | -1.85495346383457 | 13.11773702378606 | 10.98439673043601 |
| C  | 0.12765412258168  | 13.46914295831269 | 10.29997098256067 |
| H  | -0.18158328030412 | 13.81675148027698 | 9.32068234692094  |
| C  | 1.92951941459654  | 12.97945005583212 | 11.88274851172395 |
| C  | 1.52443366632676  | 13.43189100935656 | 10.59510044577878 |
| C  | 2.51322275325028  | 13.76830376320991 | 9.67591906172976  |
| H  | 2.23736010485948  | 14.11585988749564 | 8.68728876176632  |
| C  | 3.85567310645227  | 13.63748094296638 | 10.03879694039199 |
| H  | 4.63929983092919  | 13.88349316482313 | 9.33491524618562  |
| C  | 4.20765864258466  | 13.22739958431481 | 11.32078861593266 |
| C  | 1.05730594523391  | 11.04710971855775 | 16.24584064585824 |
| H  | 2.14444702968011  | 10.95074473204547 | 16.14100386670128 |
| C  | 5.66244749441414  | 13.10563736098795 | 11.70053980986652 |
| H  | 5.69748438075553  | 12.88788135547227 | 12.76965521528542 |
| C  | 5.30908398754742  | 9.11248280828929  | 13.16719864110657 |
| C  | 6.50461704932440  | 9.69291546669398  | 13.59431644750253 |
| C  | 7.73465119532711  | 9.28067863214189  | 13.10576862988694 |
| H  | 8.63320563309415  | 9.77542637516954  | 13.45200625587961 |
| C  | 7.78446278911316  | 8.25387890171028  | 12.17052063053673 |
| H  | 8.74086364953330  | 7.92880100014703  | 11.78027936635200 |
| C  | 6.60784723888620  | 7.65047777213546  | 11.73472479065447 |
| H  | 6.64371746826207  | 6.85141777559143  | 11.00489726506960 |
| C  | 5.38249836705987  | 8.07627326972836  | 12.22950192890257 |
| H  | 4.46898305256191  | 7.61716501244088  | 11.87341788175069 |
| C  | 3.31639820565099  | 8.37094517150344  | 15.06541495830458 |
| C  | 2.88621252714793  | 7.10380145288657  | 14.65563565935379 |
| H  | 2.71158665771419  | 6.90129913142401  | 13.60625310912537 |
| C  | 2.66999269007428  | 6.10681037316494  | 15.59690562533333 |
| H  | 2.33073455496123  | 5.12938124437959  | 15.27596333751546 |
| C  | 2.89236966411051  | 6.36153257655251  | 16.94888275585285 |
| H  | 2.72281712443419  | 5.58088471882159  | 17.68060086392896 |
| C  | 3.32871947013618  | 7.61637768148542  | 17.35730549133517 |
| H  | 3.50171683573450  | 7.81980388774438  | 18.40709212549933 |
| C  | 3.53623104849507  | 8.62091008917514  | 16.41957040371991 |
| H  | 3.86604082450834  | 9.59948964862303  | 16.74286300242374 |
| C  | 2.53357058432855  | 9.44788466647313  | 12.47545041321849 |
| C  | 1.20419437669303  | 9.09544987290003  | 12.73388501058698 |
| H  | 0.90417767436856  | 8.79987668305429  | 13.73001667411771 |
| C  | 0.25818409072889  | 9.14445369724067  | 11.72018951964032 |
| H  | -0.76894519672917 | 8.87759068932835  | 11.93545942919814 |
| C  | 0.62305283686554  | 9.55457855877715  | 10.44075842742745 |

|   |                   |                   |                   |
|---|-------------------|-------------------|-------------------|
| H | -0.12029101099698 | 9.60612357389752  | 9.65494068609771  |
| C | 1.94260965714465  | 9.90485872451312  | 10.17571777142318 |
| H | 2.23273117487399  | 10.23470475448498 | 9.18600138569664  |
| C | 2.89293350061896  | 9.85873323163428  | 11.18683129701876 |
| H | 3.91040125510283  | 10.15893325203477 | 10.97520518350434 |
| C | 5.63831934164920  | 11.59465163509608 | 16.49243969816724 |
| C | 6.28536979695646  | 10.55739551373167 | 15.80982459114833 |
| C | 6.73092154816425  | 9.41747013019707  | 16.46102047507143 |
| H | 7.21522693578496  | 8.62665654791660  | 15.90300504383027 |
| C | 6.52615839923443  | 9.31091078144427  | 17.83292414753529 |
| H | 6.87024458878433  | 8.42512631901038  | 18.35222335595312 |
| C | 5.87399635470094  | 10.32147885776775 | 18.53366606311531 |
| H | 5.70906404281787  | 10.22576210509137 | 19.59941726801078 |
| C | 5.42565892074078  | 11.45623661954365 | 17.86498705809806 |
| H | 4.89382300007784  | 12.22872175996114 | 18.40495420260460 |
| C | 6.45034292375421  | 13.96743573840252 | 15.02344348898839 |
| C | 6.21611287633850  | 15.30305084132505 | 14.67632975979254 |
| H | 5.20304037620316  | 15.68611712882071 | 14.64554993755051 |
| C | 7.27963332196780  | 16.14898854623874 | 14.39371685934161 |
| H | 7.08732312593412  | 17.18308049109488 | 14.13480623980271 |
| C | 8.58536364769295  | 15.66992390318745 | 14.44275164924467 |
| H | 9.41503644990695  | 16.33095803943109 | 14.22384157678010 |
| C | 8.82216952906584  | 14.34122711280868 | 14.78054965170159 |
| H | 9.83724317034268  | 13.96588032510511 | 14.83091338011049 |
| C | 7.76157423281436  | 13.49085763868650 | 15.07275081457272 |
| H | 7.96229038337986  | 12.46759950289826 | 15.35623967395894 |
| C | 4.09960737225619  | 14.10749075135295 | 16.52241026633975 |
| C | 2.83998113389798  | 14.54450383436665 | 16.10970376351096 |
| H | 2.37796488801689  | 14.10684840298407 | 15.23109590085418 |
| C | 2.17838399996186  | 15.54405649481619 | 16.81765077477600 |
| H | 1.20393657583494  | 15.88199190310432 | 16.48661696492885 |
| C | 2.76854696626660  | 16.10149389278372 | 17.94497423031902 |
| H | 2.25403148566525  | 16.87759077808215 | 18.49859839784200 |
| C | 4.03028064207283  | 15.67398271244791 | 18.35815123238623 |
| H | 4.49682924355598  | 16.12040016083939 | 19.22795758280670 |
| C | 4.70255883691849  | 14.69378834162087 | 17.64282552114329 |
| H | 5.70426589938910  | 14.40313862009468 | 17.93660693850259 |
| C | 0.76986566391651  | 12.02203955652308 | 17.39859584781304 |
| H | -0.30699159855868 | 12.11395180773954 | 17.55712696387391 |
| H | 1.21811363880615  | 11.64782048127236 | 18.32257134240561 |
| H | 1.17135337261528  | 13.01385409877117 | 17.20090358689364 |
| C | 0.46053790816251  | 9.67605362358627  | 16.58482891011151 |
| H | 0.67603901005110  | 8.93211863948191  | 15.81835888791541 |
| H | 0.87158577417115  | 9.31180146128900  | 17.52776004391071 |
| H | -0.62270052052629 | 9.74632169774968  | 16.69990724017442 |
| C | 6.42729700320097  | 14.40698691235620 | 11.43415619707955 |
| H | 7.42652036423933  | 14.34731989927354 | 11.8692977793884  |
| H | 6.53522195756702  | 14.58125816806427 | 10.36117781455093 |
| H | 5.91522760003109  | 15.26556847916694 | 11.86773734925885 |
| C | 6.33396775308644  | 11.94461212966318 | 10.95250245784498 |
| H | 7.38030978826087  | 11.86443772431905 | 11.25583259830443 |
| H | 5.85122982563249  | 10.98985068911684 | 11.16358861997201 |
| H | 6.30472259260534  | 12.11250667278747 | 9.87372563150033  |

[7]<sup>2+</sup> - D<sup>0x</sup> (S = 1)

Eh = -3167.568410546929

|    |                   |                   |                   |
|----|-------------------|-------------------|-------------------|
| Cu | 1.22440749596925  | 3.93544545656942  | 5.02034908236390  |
| N  | 1.35224552819468  | 5.50869348940592  | 6.20900197584010  |
| N  | 1.38671921060532  | 4.57120104565888  | 8.32127611579639  |
| N  | 2.82711691922565  | 6.34159424374430  | 7.86721782309343  |
| N  | 0.94973470289243  | 5.30658398895533  | 3.61018976530094  |
| N  | 0.22469203467625  | 2.34295044393482  | 4.41002479182167  |
| N  | -1.70758929312306 | 3.24526642423872  | 3.51905674196574  |
| N  | -0.67152524785922 | 1.49838635467475  | 2.38425205976157  |
| N  | 2.44404374941236  | 2.58442769381977  | 5.81528910669425  |
| C  | 1.85508052960524  | 5.49485426446888  | 7.45898302980316  |
| C  | 0.07576938185341  | 3.95480143393252  | 8.12897063326870  |
| H  | -0.54370135100437 | 4.60434090890021  | 7.51723643217873  |
| H  | -0.38960478464556 | 3.82159742906204  | 9.10667072267398  |
| H  | 0.16929288429917  | 2.97569541901144  | 7.64918042211546  |
| C  | 2.19810704809334  | 3.98777279517398  | 9.39016101267765  |
| H  | 2.14207184249121  | 2.90035277689425  | 9.30842996682582  |
| H  | 1.83079335811951  | 4.28316064686842  | 10.37487541111080 |
| H  | 3.23382586593977  | 4.29702382479319  | 9.28061587212081  |
| C  | 2.89978740382314  | 6.86656562522939  | 9.23450712296437  |
| H  | 2.94163629700132  | 7.95680757121767  | 9.17981070744290  |
| H  | 3.79274859859654  | 6.51111151889224  | 9.75230016725205  |
| H  | 2.01228404037739  | 6.57584750525591  | 9.79015881070774  |
| C  | 3.77398787189310  | 6.93245948042892  | 6.92298994218304  |
| H  | 3.75203780113485  | 6.38313446960390  | 5.98468862867813  |
| H  | 4.77379409102593  | 6.87161377816519  | 7.35672850352482  |
| H  | 3.53628177088851  | 7.98068720777308  | 6.72750641767206  |
| C  | 1.10882852713808  | 6.70712597903678  | 5.52438018073997  |
| C  | 0.96282334096042  | 7.96701418871643  | 6.07979595894046  |
| H  | 1.06030867949253  | 8.10444377431097  | 7.14882182077595  |
| C  | 0.66801825816966  | 9.08438348472081  | 5.27361430127793  |
| H  | 0.56453165440748  | 10.05222364872734 | 5.74827823456500  |
| C  | 0.51788524018466  | 8.97102949346875  | 3.91292041989736  |
| H  | 0.31448639307824  | 9.83883441640074  | 3.29837543174491  |
| C  | 0.62320797760274  | 7.69766977521975  | 3.30902124993621  |
| C  | 0.89416397326400  | 6.57003886036072  | 4.12805104363960  |
| C  | 0.47975819129516  | 7.46894623823667  | 1.92285981189202  |
| H  | 0.28787203997035  | 8.30727976975297  | 1.26308755523215  |
| C  | 0.58777503358421  | 6.19255177858804  | 1.42028105040001  |
| H  | 0.49855272498171  | 5.99515377149515  | 0.36029073781455  |
| C  | 0.80670009599494  | 5.12755742694533  | 2.30433408746826  |
| H  | 0.86693014970019  | 4.10724329153713  | 1.94567184110404  |
| C  | -0.71133128016713 | 2.34107928323139  | 3.44095993688720  |
| C  | -2.07732452321357 | 3.85075636922394  | 4.79652359731974  |
| H  | -1.60882940412633 | 4.83257040115676  | 4.91559685656336  |
| H  | -1.76999251885706 | 3.19814889357855  | 5.60871246210019  |
| H  | -3.16088565939820 | 3.97525223910735  | 4.81870130084530  |
| C  | -2.36004825151164 | 3.82106370720306  | 2.34270428329706  |
| H  | -1.82748433260667 | 3.52612897521776  | 1.44274821671308  |
| H  | -2.33022166773438 | 4.90889227282045  | 2.43235673080517  |
| H  | -3.40240144577590 | 3.50473775718160  | 2.27054760953689  |
| C  | -1.88063488388589 | 0.95024166872257  | 1.76174461190242  |
| H  | -1.99646630450117 | 1.30165023523650  | 0.73456578219483  |
| H  | -2.75476788349629 | 1.22627503860824  | 2.34527777655209  |
| H  | -1.79397341335354 | -0.13872116248343 | 1.74726236536650  |
| C  | 0.58770925914956  | 0.93617063183593  | 1.89983993224178  |

|   |                   |                   |                  |
|---|-------------------|-------------------|------------------|
| H | 0.59974536569525  | 1.00864491073290  | 0.81073375916294 |
| H | 0.68848768992544  | -0.11344267347961 | 2.18555987353994 |
| H | 1.42452649219463  | 1.49687316137178  | 2.30957509328367 |
| C | 0.78041389073273  | 1.15348366141238  | 4.90128997582286 |
| C | 0.23939438211018  | -0.11758716991295 | 4.80844907312416 |
| H | -0.69905236197343 | -0.27278297319861 | 4.29224645844639 |
| C | 0.88515491053846  | -1.22424006176114 | 5.39485136204794 |
| H | 0.42851642009769  | -2.20128908491945 | 5.29674451859709 |
| C | 2.07125433624282  | -1.08935086705124 | 6.07430303665165 |
| H | 2.57212975390752  | -1.94902907630701 | 6.50116057399993 |
| C | 2.64083105194092  | 0.19531992144755  | 6.22349618749474 |
| C | 1.97298876350562  | 1.31182382416128  | 5.65473443030217 |
| C | 3.85183931601245  | 0.44582387017281  | 6.90511616760933 |
| H | 4.39894260945193  | -0.38343453931752 | 7.33865707471813 |
| C | 4.32988949036508  | 1.73167848363675  | 7.01040102665926 |
| H | 5.26411240757911  | 1.94566849891580  | 7.51234364187793 |
| C | 3.58281125486644  | 2.78388924620705  | 6.46441829047259 |
| H | 3.91569750697482  | 3.81047886305753  | 6.55661200259662 |

**[7]<sup>0</sup> - D<sup>red</sup> (S = 1)**

Eh = -3167.985283039161

|    |                   |                   |                   |
|----|-------------------|-------------------|-------------------|
| Cu | 6.97031030106683  | 8.70152569522433  | 5.45816671595473  |
| N  | 8.52824446149057  | 9.88947639315182  | 6.22453259481482  |
| N  | 9.41463796639483  | 9.73552242580987  | 8.43137418798875  |
| N  | 7.51792448218780  | 11.01255375590983 | 7.97547735174714  |
| N  | 8.43709111422870  | 7.96761780828678  | 4.35940913533669  |
| N  | 5.44383457174601  | 9.58889082526539  | 4.28550187034403  |
| N  | 6.55381491538365  | 10.21861295222879 | 2.35938260839148  |
| N  | 4.76879628273099  | 8.73292575807604  | 2.16654234606010  |
| N  | 5.45618539977243  | 8.31371493814017  | 6.64829657903314  |
| C  | 8.51642083249437  | 10.20314984758303 | 7.49641101052872  |
| C  | 9.95070312141406  | 10.59695200101081 | 9.47158976427417  |
| H  | 11.01786876393845 | 10.78187754839716 | 9.29585253053708  |
| H  | 9.83938343867384  | 10.13772583734373 | 10.45959612614032 |
| H  | 9.42142711340744  | 11.54721707691807 | 9.45960859035645  |
| C  | 10.12327846955586 | 8.48719187486116  | 8.20861092650811  |
| H  | 9.55623045562793  | 7.87167128078839  | 7.51243850777395  |
| H  | 10.20747284718035 | 7.96136060228346  | 9.16456151606383  |
| H  | 11.12561415648330 | 8.64615493567910  | 7.79705896244875  |
| C  | 6.83152541667963  | 10.69198282697263 | 9.22441648993033  |
| H  | 7.41642812701291  | 9.96720876058159  | 9.78513460271342  |
| H  | 5.84912249039002  | 10.25770344366007 | 9.01322955564932  |
| H  | 6.70047230758344  | 11.59423516462144 | 9.82818505463894  |
| C  | 6.70313569357213  | 11.73355896955194 | 7.00560549002119  |
| H  | 7.34535934591183  | 12.12705766424891 | 6.22094828318858  |
| H  | 6.20671207248440  | 12.55727735482806 | 7.52339091257799  |
| H  | 5.95079044895538  | 11.08577965502440 | 6.54438198098717  |
| C  | 9.70850831542803  | 9.61560667707933  | 5.53295711491901  |
| C  | 10.90302638257223 | 10.31913522823814 | 5.70891893399889  |
| H  | 10.95066397048692 | 11.10109889863549 | 6.45811756802785  |
| C  | 12.01528242535920 | 10.03780820664043 | 4.91248944076120  |
| H  | 12.93041121365514 | 10.59930963458928 | 5.06481739909483  |
| C  | 11.96317954961486 | 9.06211091576801  | 3.93107110012745  |
| H  | 12.83161405579188 | 8.84672019681515  | 3.31875371260045  |
| C  | 10.77149595283052 | 8.33829488709440  | 3.70902244883235  |
| C  | 9.63268342851662  | 8.62267997611796  | 4.51920422777745  |
| C  | 10.63248579445596 | 7.33351390236577  | 2.71871392053729  |

|   |                   |                   |                  |
|---|-------------------|-------------------|------------------|
| H | 11.47627669259335 | 7.08805325033874  | 2.08434778445216 |
| C | 9.41704384761215  | 6.67859829488226  | 2.58137309595837 |
| H | 9.28169813431003  | 5.90402566705839  | 1.83587930517523 |
| C | 8.35267656728484  | 7.01677840884643  | 3.40975015902746 |
| H | 7.39311260666056  | 6.52274113927741  | 3.31700899073116 |
| C | 5.55481117591938  | 9.51861179742684  | 2.98133310676964 |
| C | 7.34598051584407  | 9.61553509486019  | 1.29088311949713 |
| H | 6.87898126517431  | 8.68867310970138  | 0.96880323101109 |
| H | 8.35134804082447  | 9.38770162205986  | 1.65696716930066 |
| H | 7.42435266885497  | 10.29799367352169 | 0.43944558847972 |
| C | 7.25063597789736  | 11.24424606802954 | 3.12415834818542 |
| H | 6.53489272173020  | 11.76957247404479 | 3.75181741089524 |
| H | 7.70999945011391  | 11.94290240960697 | 2.42095688527176 |
| H | 8.02541474794992  | 10.81292159192589 | 3.76532054651352 |
| C | 4.29728150631518  | 9.20178655083424  | 0.87487893134630 |
| H | 4.76736447360531  | 10.15536932438440 | 0.64512164621627 |
| H | 3.20893081224044  | 9.33850996179989  | 0.89805862669373 |
| H | 4.53727522754220  | 8.48484618510943  | 0.08243563463611 |
| C | 4.10653722466654  | 7.55509421889202  | 2.69846350464221 |
| H | 4.62519589300449  | 7.22752465789827  | 3.59749953291301 |
| H | 4.15447182456823  | 6.76038713041943  | 1.94752848294592 |
| H | 3.05830258325977  | 7.74759958805146  | 2.95043376664688 |
| C | 4.22249835127698  | 9.44934639376305  | 4.94104463291728 |
| C | 3.01634224276415  | 9.97889919435689  | 4.47615056740683 |
| H | 2.99895394049722  | 10.49532522995043 | 3.52328079903851 |
| C | 1.85002517761889  | 9.86822333044129  | 5.23751403574487 |
| H | 0.92666737953289  | 10.28844596917742 | 4.85448151249688 |
| C | 1.85977341683318  | 9.24091044165802  | 6.47074945676813 |
| H | 0.95167235429053  | 9.15704372810346  | 7.05700692105254 |
| C | 3.06046568516798  | 8.70721063485255  | 6.98734487895768 |
| C | 4.25228804493430  | 8.81151723422482  | 6.21152122158255 |
| C | 3.15466343820232  | 8.06554753563668  | 8.24738779115085 |
| H | 2.26918138701055  | 7.96756886557544  | 8.86464657558065 |
| C | 4.37973615180753  | 7.57168439230582  | 8.66753863718374 |
| H | 4.48336605640485  | 7.07446717296101  | 9.62461489575663 |
| C | 5.49686017393422  | 7.70962201770133  | 7.84968375955851 |
| H | 6.46479255667364  | 7.33344272053054  | 8.15823888680899 |

[7]<sup>+</sup> - s<sub>0</sub> (s = 0)

Eh = -3167.861333071082

|    |                   |                   |                   |
|----|-------------------|-------------------|-------------------|
| Cu | 6.98204807999777  | 8.77702420433037  | 5.42054279144505  |
| N  | 8.55448159944739  | 9.83412401318067  | 6.25512388560640  |
| N  | 9.42985685515834  | 9.78338028085413  | 8.46448159558611  |
| N  | 7.54596084172646  | 11.04303779717849 | 7.94064925465305  |
| N  | 8.46256494169819  | 7.94085102611855  | 4.36439018873945  |
| N  | 5.42695749704109  | 9.49907401640230  | 4.25780292473643  |
| N  | 6.49604022177409  | 10.22179836571847 | 2.34761118560978  |
| N  | 4.70614523813092  | 8.75651566336561  | 2.11578127426915  |
| N  | 5.47966698593964  | 8.26753996256326  | 6.63668227951428  |
| C  | 8.54010100062123  | 10.21474727398424 | 7.52124248242171  |
| C  | 9.89616691109943  | 10.64541145740486 | 9.54433890974250  |
| H  | 10.98297522083306 | 10.75507882908385 | 9.47331802726068  |
| H  | 9.65561377442635  | 10.22396370029976 | 10.52440807712657 |
| H  | 9.43727125257940  | 11.62663177542666 | 9.45230682543058  |
| C  | 10.13636522243784 | 8.51990333304079  | 8.31357636419526  |
| H  | 9.60254487990205  | 7.88655962051477  | 7.60805783397463  |
| H  | 10.16929592555623 | 8.02425095864981  | 9.28678379451508  |

|   |                   |                   |                  |
|---|-------------------|-------------------|------------------|
| H | 11.15970891900667 | 8.66351060791476  | 7.95379563665144 |
| C | 6.89199182046841  | 10.86614573536084 | 9.23516583544854 |
| H | 7.37335524281765  | 10.05960876593425 | 9.78198540550004 |
| H | 5.84219386837990  | 10.60366078829259 | 9.07711491200790 |
| H | 6.93922923446565  | 11.78298629115116 | 9.82737648123977 |
| C | 6.77218652948408  | 11.77348687838344 | 6.94458239995526 |
| H | 7.43429749730451  | 12.11789267048498 | 6.15414205255768 |
| H | 6.30963330782244  | 12.63198192548218 | 7.43342407480978 |
| H | 5.99468235654498  | 11.14360441923102 | 6.49970313756237 |
| C | 9.73686121235023  | 9.55776932156325  | 5.57894541871320 |
| C | 10.93845298689458 | 10.22587182808392 | 5.75941961215606 |
| H | 11.00649638182558 | 10.99989696174728 | 6.51446803904560 |
| C | 12.06117261094215 | 9.93045550614498  | 4.96592047349290 |
| H | 12.98081566139877 | 10.47675747282597 | 5.13801956545473 |
| C | 12.00746346678918 | 8.97638323151556  | 3.97757657155409 |
| H | 12.87464705314889 | 8.75424894273430  | 3.36791024037419 |
| C | 10.79942838902519 | 8.28099790663541  | 3.74505589472115 |
| C | 9.66275824656240  | 8.57415782933685  | 4.54630055521934 |
| C | 10.65086366661390 | 7.29490519790458  | 2.74194033162649 |
| H | 11.49716785897358 | 7.04615181959699  | 2.11203725669053 |
| C | 9.44155483553721  | 6.66596173407777  | 2.58062342392751 |
| H | 9.29995101498133  | 5.90258882734958  | 1.82641796783791 |
| C | 8.36825183558513  | 7.02006073603647  | 3.41487322848660 |
| H | 7.40261648546136  | 6.54035960256010  | 3.30592515832173 |
| C | 5.51006293850067  | 9.49531532613087  | 2.93796186344645 |
| C | 7.23700957199450  | 9.72344433364391  | 1.19125976631831 |
| H | 6.84280201800566  | 8.75613611050517  | 0.89070298364019 |
| H | 8.28885570444251  | 9.60160764102995  | 1.46375985324775 |
| H | 7.17071233716133  | 10.41868805677057 | 0.35098651400276 |
| C | 7.17186019652587  | 11.25371449161196 | 3.12395995790211 |
| H | 6.45040198879365  | 11.75092683476772 | 3.76707782635374 |
| H | 7.60421058576160  | 11.97654488458468 | 2.43051064858174 |
| H | 7.96390747085055  | 10.82898885523424 | 3.74898433568739 |
| C | 4.27521185835501  | 9.24309722893065  | 0.80976659772487 |
| H | 4.68239392640417  | 10.23628130106413 | 0.63785999826617 |
| H | 3.18228870143009  | 9.30078822653054  | 0.79065849726961 |
| H | 4.59968279469484  | 8.57526089221638  | 0.00697189385814 |
| C | 4.03242652711063  | 7.55914971196985  | 2.59484161786427 |
| H | 4.53167410709768  | 7.19317623704746  | 3.48944020640675 |
| H | 4.08644916402894  | 6.79554395880908  | 1.81501539471906 |
| H | 2.98131598423562  | 7.75012377951974  | 2.83146646477708 |
| C | 4.21713812798534  | 9.36591349650096  | 4.92675619825951 |
| C | 3.00056305833124  | 9.87135738329433  | 4.49279910533819 |
| H | 2.94813288343467  | 10.37795169876768 | 3.53645936663958 |
| C | 1.84165481294127  | 9.75594528298906  | 5.28037274043181 |
| H | 0.91131528963424  | 10.16445332360082 | 4.90439872058545 |
| C | 1.87318627946212  | 9.14752187081974  | 6.51268247068725 |
| H | 0.97824538121535  | 9.06160894740719  | 7.11660966716504 |
| C | 3.09381943093168  | 8.63341331207116  | 7.00520892913767 |
| C | 4.26762257106751  | 8.74383033943974  | 6.21149408664103 |
| C | 3.21761589138379  | 8.00437487973530  | 8.26591116250233 |
| H | 2.34234522004676  | 7.90273979619008  | 8.89715750948515 |
| C | 4.43976270716251  | 7.52947001480675  | 8.67170803287258 |
| H | 4.56397752295381  | 7.03804850056888  | 9.62808136829349 |
| C | 5.54974535133456  | 7.68209874186478  | 7.82454361949622 |
| H | 6.52577866596798  | 7.31709826311106  | 8.12221023421641 |

[7]<sup>+</sup> - T<sub>1</sub> (S = 2)

Eh = -3167.806918989192

|    |                   |                   |                   |
|----|-------------------|-------------------|-------------------|
| Cu | 1.27232345398881  | 3.93542090397898  | 4.98846740100057  |
| N  | 1.33399801887553  | 5.50483574534404  | 6.21253736201948  |
| N  | 1.41838527505007  | 4.53377352004630  | 8.30766956109701  |
| N  | 2.81387713828310  | 6.34190259494080  | 7.86510531515319  |
| N  | 0.94191148667175  | 5.28443280626525  | 3.62397772446634  |
| N  | 0.21458570052004  | 2.34522660865410  | 4.42286456969454  |
| N  | -1.68461465707781 | 3.28177096359400  | 3.49761728483940  |
| N  | -0.67654945397106 | 1.49850564606174  | 2.39550054465705  |
| N  | 2.41990070937905  | 2.60604177505838  | 5.82673667755585  |
| C  | 1.85264034019000  | 5.47840649855069  | 7.44171447642263  |
| C  | 0.14028764806089  | 3.86255763020337  | 8.09769618468178  |
| H  | -0.51485961294875 | 4.51227982227406  | 7.52398381860984  |
| H  | -0.30612598774402 | 3.65903581879008  | 9.07309733314830  |
| H  | 0.27358368453277  | 2.91691142676459  | 7.56428345457904  |
| C  | 2.28652165792986  | 3.92391338903988  | 9.31068127763622  |
| H  | 2.29250986307255  | 2.84270931939440  | 9.15748600904078  |
| H  | 1.93284451099046  | 4.13810239374267  | 10.32224410017889 |
| H  | 3.30033123498599  | 4.29572506971365  | 9.19264020403532  |
| C  | 2.85924086915513  | 6.86152252584381  | 9.22868482189534  |
| H  | 2.83029361389093  | 7.95416259389052  | 9.19077298624761  |
| H  | 3.77415564717552  | 6.55685057909069  | 9.74324922165725  |
| H  | 1.99576480032213  | 6.50562669303311  | 9.78490377439150  |
| C  | 3.73947824520452  | 6.95787753132761  | 6.92133658195006  |
| H  | 3.72420739498630  | 6.40698143543365  | 5.98386551644422  |
| H  | 4.74441358909740  | 6.91947232969262  | 7.34804570453478  |
| H  | 3.47320154404168  | 7.99893567409305  | 6.72146474910813  |
| C  | 1.07858538345835  | 6.70363602344212  | 5.52676415703692  |
| C  | 0.91246807322136  | 7.96302626984014  | 6.10190745244666  |
| H  | 1.00433766974958  | 8.08845711918057  | 7.17305484267072  |
| C  | 0.60339117902048  | 9.06716793645545  | 5.29966591883671  |
| H  | 0.48056431976108  | 10.03627598806192 | 5.76796174529145  |
| C  | 0.45809398273504  | 8.94492824700486  | 3.93070696199315  |
| H  | 0.24195240059656  | 9.81152272456940  | 3.31795161704095  |
| C  | 0.58048464969318  | 7.68061700010092  | 3.31680097059488  |
| C  | 0.86807933784089  | 6.55635403356348  | 4.13758466017594  |
| C  | 0.43973848544851  | 7.45159937098262  | 1.92510085552416  |
| H  | 0.23770717643685  | 8.28529643346671  | 1.26414940929665  |
| C  | 0.57528951866148  | 6.16366070350144  | 1.42618191478210  |
| H  | 0.49250638067590  | 5.96617008349138  | 0.36500401530210  |
| C  | 0.81296187218974  | 5.10619256586388  | 2.29397817497469  |
| H  | 0.90304394878486  | 4.08849267046147  | 1.93581099315531  |
| C  | -0.69770231515685 | 2.35743545718191  | 3.44923183120645  |
| C  | -2.02304916326675 | 3.94355905891125  | 4.75321969932214  |
| H  | -1.48869243727000 | 4.89247669284681  | 4.85520125451970  |
| H  | -1.76419421281681 | 3.29142253676705  | 5.58284902590795  |
| H  | -3.09712022750680 | 4.13881201960742  | 4.76034855476952  |
| C  | -2.25945477946176 | 3.88611055029345  | 2.29931539665218  |
| H  | -1.73099866529139 | 3.53000111294521  | 1.41951748632473  |
| H  | -2.13913232266394 | 4.96970305259851  | 2.36247491104632  |
| H  | -3.32255197301717 | 3.65009837130501  | 2.20862777105566  |
| C  | -1.89324567834916 | 0.95489176126871  | 1.79953506987141  |
| H  | -2.00389215365730 | 1.26569559265573  | 0.75740742481626  |
| H  | -2.75884795123548 | 1.28422350043320  | 2.36883664827207  |
| H  | -1.84323318038192 | -0.13718397655575 | 1.83145611794245  |
| C  | 0.57460713034865  | 0.91395008373377  | 1.92763868135234  |



|   |                   |                   |                  |
|---|-------------------|-------------------|------------------|
| H | 0.59540913799807  | 0.96752253427368  | 0.83663897091646 |
| H | 0.66895886110007  | -0.12974177781786 | 2.23825582337399 |
| H | 1.41266437517492  | 1.47595021893276  | 2.33300333504527 |
| C | 0.76648129929000  | 1.15497003586159  | 4.92529032437438 |
| C | 0.20281497954271  | -0.11744174489953 | 4.83682252491810 |
| H | -0.73726932091857 | -0.26129404530605 | 4.32013576470281 |
| C | 0.83869246667726  | -1.21116141594546 | 5.43484762295853 |
| H | 0.38300811487711  | -2.19048131378702 | 5.35196225286885 |
| C | 2.03039469633992  | -1.06607954306692 | 6.11962527243335 |
| H | 2.52449981639813  | -1.92475566582727 | 6.55746743086877 |
| C | 2.61208446672621  | 0.21096536084672  | 6.26384515366409 |
| C | 1.94964781457551  | 1.32417103050250  | 5.67855575162044 |
| C | 3.82474476436864  | 0.46334129117924  | 6.95286051294002 |
| H | 4.36874354851838  | -0.36121556583414 | 7.39660509507121 |
| C | 4.30599673455522  | 1.76211687438404  | 7.03823508583895 |
| H | 5.24040195505320  | 1.97721234747400  | 7.54084144831589 |
| C | 3.58216782271101  | 2.80696542551346  | 6.47987432025357 |
| H | 3.92346630380207  | 3.83202767471527  | 6.54871209260829 |

**[8]<sup>2+</sup> - D<sup>o</sup> (S = 1)**

Eh = -3246.253599860859

|    |                   |                   |                   |
|----|-------------------|-------------------|-------------------|
| Cu | 10.30962323189138 | 2.54381380549217  | 6.88398390284297  |
| C  | 7.94583733926882  | 2.01014313318413  | 8.65413416231655  |
| N  | 8.43690994883481  | 2.08950837721227  | 7.40298261227537  |
| C  | 9.49159794120540  | 0.17823425691855  | 9.16717864735049  |
| H  | 9.27690719225051  | -0.08866651030694 | 8.13698610422637  |
| H  | 9.28365962332267  | -0.67398292195409 | 9.81726971189116  |
| H  | 10.54643539178531 | 0.44406803339218  | 9.26566920606471  |
| N  | 8.63259582993007  | 1.29086030344854  | 9.56534138616484  |
| C  | 8.66883976539137  | 1.62820978717770  | 10.98717666980004 |
| H  | 9.71400773325217  | 1.67116744337474  | 11.30092538737859 |
| H  | 8.15444155009707  | 0.87875512296122  | 11.59204075797680 |
| H  | 8.21155639559631  | 2.60043323241227  | 11.14854073284791 |
| N  | 6.81505290486301  | 2.64091224705649  | 9.04377285032085  |
| N  | 9.45149921275980  | 3.08953733073777  | 5.16958107239286  |
| C  | 5.90411802958360  | 2.07736395687120  | 10.04453828816854 |
| H  | 4.89912977014635  | 2.05740013929696  | 9.61705999541165  |
| H  | 5.88157994543624  | 2.68248228699569  | 10.95308666606206 |
| H  | 6.20329275565865  | 1.06134753402515  | 10.28736386400025 |
| C  | 6.32356182145727  | 3.84504509970491  | 8.37785062648718  |
| H  | 7.09563133509789  | 4.25941543633238  | 7.73626785850853  |
| H  | 6.05715802736735  | 4.57730797264519  | 9.14255650366383  |
| H  | 5.43984801153632  | 3.62483722086292  | 7.77464101390549  |
| C  | 7.58530005244573  | 2.12544682867995  | 6.29024914102302  |
| C  | 6.30026926011675  | 1.60982735801789  | 6.22431036867318  |
| H  | 5.85767695231672  | 1.14755779093682  | 7.09734507303628  |
| C  | 5.55948517717910  | 1.66227052653297  | 5.02920158240178  |
| H  | 4.55938533999354  | 1.24734706914401  | 5.01845791405760  |
| C  | 6.07717996075158  | 2.23437694692198  | 3.89119310875516  |
| H  | 5.49279514968844  | 2.29841172546324  | 2.98207645297449  |
| C  | 8.01637696833077  | 3.36560353043821  | 2.80317092279350  |
| H  | 7.46970891734646  | 3.46630380952397  | 1.87257676231874  |
| C  | 8.15018299258810  | 2.65984677809750  | 5.10473928860374  |
| C  | 7.39327321869575  | 2.74572619769626  | 3.91067735410135  |
| C  | 10.01176924047106 | 3.68849555097975  | 4.12206050936128  |
| C  | 9.29376463494351  | 3.84991472102021  | 2.91693783677285  |
| H  | 9.77164341750266  | 4.35674769549486  | 2.08822940215214  |

|   |                   |                   |                   |
|---|-------------------|-------------------|-------------------|
| C | 11.40777935315339 | 4.21124556604755  | 4.25142885818354  |
| H | 12.08047837714164 | 3.71720210359044  | 3.54651318750703  |
| H | 11.78017940659474 | 4.06641901494445  | 5.26486049636711  |
| H | 11.42890689079749 | 5.27883214307642  | 4.02040481342330  |
| C | 12.37951202927925 | 1.09946351132429  | 5.27077990034905  |
| N | 11.96595411774500 | 1.51186434560885  | 6.48392435876319  |
| C | 10.36483515630479 | -0.27454108771581 | 5.05069893581835  |
| H | 9.43485277349001  | 0.28908983435699  | 4.94582541028381  |
| H | 10.55847257518357 | -0.46803065456639 | 6.10134003060361  |
| H | 10.26275260506736 | -1.22147323832939 | 4.51754765470195  |
| N | 11.49249745147915 | 0.45994728603941  | 4.48097546152176  |
| C | 11.49706541130308 | 0.56274288104461  | 3.02259457868485  |
| H | 11.74935317418003 | -0.39083673723307 | 2.55462781769861  |
| H | 12.20902881945634 | 1.31987103752543  | 2.70636053487925  |
| H | 10.49712361942016 | 0.85707146189336  | 2.69654212266842  |
| N | 11.31517713926333 | 3.07885444794693  | 8.51825715148094  |
| N | 13.62840853825930 | 1.32060675046581  | 4.80266215446540  |
| C | 14.45515496156340 | 2.42596985512655  | 5.28159067150495  |
| H | 14.88808183045400 | 2.93328931953585  | 4.41725622020009  |
| H | 15.26270446304481 | 2.05972846069527  | 5.91935829187427  |
| H | 13.84799885970054 | 3.12738004744801  | 5.84585164809311  |
| C | 14.31467491005319 | 0.37940798288244  | 3.91260395873012  |
| H | 14.47350432967417 | 0.80802468957187  | 2.92099916067836  |
| H | 13.73830649427123 | -0.53790584512399 | 3.82861896812255  |
| H | 15.28882718963377 | 0.14706233783935  | 4.34850569139384  |
| C | 12.81850709981750 | 1.47988593881799  | 7.59570118119623  |
| C | 13.91130687256820 | 0.64440777788810  | 7.76572014394067  |
| H | 14.18983620885686 | -0.04773686741007 | 6.98138561219667  |
| C | 14.66146969885884 | 0.66738674356961  | 8.95583145648769  |
| H | 15.50763561059727 | -0.00151874364881 | 9.05077504206858  |
| C | 14.34553399537324 | 1.52335479290259  | 9.98434368930235  |
| H | 14.94256328028766 | 1.55715076434745  | 10.88683262836437 |
| C | 13.22222553837906 | 2.37010476450493  | 9.86041653522054  |
| C | 12.44740679988129 | 2.32094488469995  | 8.67561078043309  |
| C | 12.81512994248843 | 3.29319357068806  | 10.85100990196592 |
| H | 13.38563174664453 | 3.37511382641847  | 11.76905420654233 |
| C | 11.71779479414985 | 4.08703915124496  | 10.63933293111672 |
| H | 11.41236538329778 | 4.82056885479412  | 11.37462543043612 |
| C | 10.96128628190132 | 3.95566276541326  | 9.45414809301074  |
| C | 9.76699959802090  | 4.82394338539499  | 9.21369393116377  |
| H | 10.07697003123386 | 5.87047044509702  | 9.15210893564994  |
| H | 9.05124564590112  | 4.74972754960451  | 10.03514841686595 |
| H | 9.27553595612521  | 4.55353706488844  | 8.27998626895813  |

**[8]<sup>0</sup> - D<sup>red</sup> (S = 1)**

|      |                   |                   |                   |
|------|-------------------|-------------------|-------------------|
| Eh = | -3246.66924432558 |                   |                   |
| Cu   | 10.32196996400212 | 2.61341176949332  | 6.90212070923884  |
| C    | 7.93945224957391  | 1.82577252685379  | 8.54811110918450  |
| N    | 8.40878501560998  | 1.78193997471553  | 7.32718533871388  |
| C    | 9.54251639157184  | 0.10615404481664  | 9.15137799475990  |
| H    | 9.18039263565385  | -0.39745887024855 | 8.25860201331074  |
| H    | 9.63021454359449  | -0.60904547717760 | 9.97290211790336  |
| H    | 10.52755156087050 | 0.52879128159534  | 8.93603014898414  |
| N    | 8.58373167965454  | 1.13198951502761  | 9.54013565500062  |
| C    | 8.84100093408141  | 1.74418619677296  | 10.84031709905334 |
| H    | 9.88686626654265  | 2.06105191780188  | 10.90858409994214 |
| H    | 8.63347609292632  | 1.03123378528151  | 11.64292495208077 |

|   |                   |                   |                   |
|---|-------------------|-------------------|-------------------|
| H | 8.20375552550092  | 2.61611211333289  | 10.96449989956272 |
| N | 6.85273472508641  | 2.57524308418348  | 8.95051958193869  |
| N | 9.38536592431786  | 3.16421294412311  | 5.24534918263144  |
| C | 5.88706411875098  | 2.05923322355389  | 9.90642226976376  |
| H | 4.92546658941523  | 1.87884123484415  | 9.40964962773654  |
| H | 5.72339191115275  | 2.76951561646853  | 10.72375106814106 |
| H | 6.25245997666895  | 1.12120051745267  | 10.31800945042407 |
| C | 6.42221277960776  | 3.73334495103567  | 8.18542046309006  |
| H | 7.24903252712680  | 4.09534858445788  | 7.57876105849976  |
| H | 6.12280613757193  | 4.51934938907861  | 8.88554977075183  |
| H | 5.58066207876793  | 3.50106089120523  | 7.52474427574522  |
| C | 7.58194367332628  | 1.92961636285541  | 6.21340058609837  |
| C | 6.31650403102937  | 1.34797268204692  | 6.09665391225165  |
| H | 5.92014512100709  | 0.77546216978947  | 6.92745526057507  |
| C | 5.57811300406239  | 1.48293156113299  | 4.91856030446119  |
| H | 4.60005736018528  | 1.01965594909224  | 4.85088828828216  |
| C | 6.07867479450624  | 2.19421839955975  | 3.84235361842904  |
| H | 5.49864993478431  | 2.30508230440625  | 2.93317766003627  |
| C | 7.94936021730383  | 3.52106722166559  | 2.85938548299862  |
| H | 7.40291810184704  | 3.66119097982722  | 1.93389140629760  |
| C | 8.12323939883811  | 2.63780260600606  | 5.10818448047511  |
| C | 7.36167161550658  | 2.78179883956955  | 3.91327420999560  |
| C | 9.91476870034518  | 3.86638575998959  | 4.22160637120463  |
| C | 9.21376003036359  | 4.06310451146109  | 3.03097629071788  |
| H | 9.67763797972287  | 4.64059070201482  | 2.23974084208470  |
| C | 11.30089020355351 | 4.40071254192975  | 4.41443807082285  |
| H | 12.05031555424114 | 3.63908250397481  | 4.17785965174867  |
| H | 11.44786424680455 | 4.68261476432274  | 5.46109922368449  |
| H | 11.48475128002350 | 5.26288891501675  | 3.77045014387124  |
| C | 12.30012331461178 | 0.93306285982116  | 5.41306762409890  |
| N | 11.89566035416308 | 1.21106078556148  | 6.62653028806269  |
| C | 10.27632821372145 | -0.36861727360283 | 5.12201825501473  |
| H | 9.45884356628017  | 0.33593578476109  | 5.29641741883259  |
| H | 10.54902999153151 | -0.82376146614577 | 6.07104412136625  |
| H | 9.94373717042726  | -1.13970593589050 | 4.42285109545883  |
| N | 11.44747055119680 | 0.28653293494011  | 4.55509363957889  |
| C | 11.28184445125711 | 0.73846401013701  | 3.17671469493664  |
| H | 11.27285865677050 | -0.11571269882371 | 2.49396088210557  |
| H | 12.10132676475919 | 1.40058665706404  | 2.90865485938035  |
| H | 10.34023356492457 | 1.28646085730940  | 3.07105351812580  |
| N | 11.42692102692675 | 3.11727381727798  | 8.45976002706889  |
| N | 13.52378535678629 | 1.28930525949859  | 4.88564642378285  |
| C | 14.28966454862850 | 2.38678706563645  | 5.45175645403094  |
| H | 14.74734974244861 | 2.94960648824402  | 4.63226160040561  |
| H | 15.07565294395079 | 2.03447159935659  | 6.12768650592456  |
| H | 13.62644310709299 | 3.04568147042273  | 6.00716356891262  |
| C | 14.26327020101887 | 0.39642857232914  | 4.00907844616672  |
| H | 14.55465901150273 | 0.90410806510620  | 3.08344008589693  |
| H | 13.64468411610384 | -0.46369665996667 | 3.76326275446373  |
| H | 15.17420471661605 | 0.04779159446464  | 4.51133608097932  |
| C | 12.78278904860962 | 1.30059145985971  | 7.69880633663891  |
| C | 13.84950585468051 | 0.42121582454840  | 7.90159060019936  |
| H | 14.03578523957411 | -0.35864315015385 | 7.17208550737943  |
| C | 14.65216918300300 | 0.52874682473925  | 9.03976182436666  |
| H | 15.47264707946631 | -0.16669246638629 | 9.17751320300789  |
| C | 14.41136743610220 | 1.50497388486317  | 9.99041643269795  |
| H | 15.04046484174011 | 1.59031121615826  | 10.86921881590294 |

|   |                   |                  |                   |
|---|-------------------|------------------|-------------------|
| C | 13.33081826121212 | 2.40186219169530 | 9.83206527298077  |
| C | 12.50500696456424 | 2.29187889056424 | 8.67631062636271  |
| C | 13.00892453187417 | 3.42106175960839 | 10.75964678023485 |
| H | 13.61310651451903 | 3.54423660542759 | 11.65097798558322 |
| C | 11.92606098948266 | 4.25145227671648 | 10.51019316751466 |
| H | 11.66681914359121 | 5.04263559162802 | 11.20398339464713 |
| C | 11.14929364165898 | 4.08001626230474 | 9.36419287015346  |
| C | 9.95337647407212  | 4.93658619521625 | 9.08198873287394  |
| H | 9.94067549330755  | 5.82220792196954 | 9.71989355968592  |
| H | 9.02802634577352  | 4.37867135960879 | 9.25260959884623  |
| H | 9.95006671054721  | 5.24374757480082 | 8.03161025583634  |

**[8]<sup>+</sup> - S<sub>0</sub> (S = 0)**

Eh = -3246.548912529476

|    |                   |                    |                   |
|----|-------------------|--------------------|-------------------|
| Cu | 10.30478626022288 | 2.55543541708676   | 6.88300838303230  |
| C  | 7.91441862127392  | 1.83063929000179   | 8.57201879406081  |
| N  | 8.38374396865405  | 1.86463382402458   | 7.33772316227555  |
| C  | 9.50741884059974  | 0.06152939500486   | 9.06883349806516  |
| H  | 9.14793229491089  | -0.36847292267945  | 8.13822742799966  |
| H  | 9.54960094453114  | -0.71032995027654  | 9.83974614508691  |
| H  | 10.51166228973897 | 0.46281200942703   | 8.90634138589611  |
| N  | 8.58085616023587  | 1.09729886634195   | 9.50514542302424  |
| C  | 8.78060062018599  | 1.57912333177647   | 10.86832265855232 |
| H  | 9.84811522813254  | 1.74513688610350   | 11.04070277517706 |
| H  | 8.41713448460469  | 0.85319986469082   | 11.59985629085537 |
| H  | 8.25467948866777  | 2.52013505156087   | 11.00679830861800 |
| N  | 6.81984994032356  | 2.52732176505794   | 9.00503639993327  |
| N  | 9.36979701102383  | 3.20140659800533   | 5.23547327552664  |
| C  | 5.90977485778690  | 1.99382175208212   | 10.01212152108575 |
| H  | 4.90732510783717  | 1.90767435332870   | 9.58075382421468  |
| H  | 5.85300885971677  | 2.64876861529785   | 10.88637062961784 |
| H  | 6.24472324280779  | 1.00758649675479   | 10.32323789602541 |
| C  | 6.35736816916608  | 3.72484450516223   | 8.32101518322525  |
| H  | 7.15190362792750  | 4.11926908908190   | 7.69319660379613  |
| H  | 6.09018455752576  | 4.47282349211543   | 9.07200289171892  |
| H  | 5.48304663449678  | 3.52228782340362   | 7.69489544417697  |
| C  | 7.54853451512109  | 2.01971011061247   | 6.23652202160448  |
| C  | 6.27493310902200  | 1.48233931423427   | 6.11621431718850  |
| H  | 5.85452284527378  | 0.92721707320938   | 6.94637926910779  |
| C  | 5.53145667433656  | 1.62809089414891   | 4.93238682453397  |
| H  | 4.54111067099605  | 1.19203374244021   | 4.87898309358055  |
| C  | 6.04291415795279  | 2.30275541396194   | 3.84873324226322  |
| H  | 5.46736919521935  | 2.41546483312967   | 2.93806782028884  |
| C  | 7.95553421116433  | 3.54980851976167   | 2.85364132151631  |
| H  | 7.41202016689456  | 3.68547172413120   | 1.92549453636977  |
| C  | 8.09849476422567  | 2.70351558820005   | 5.11159125229846  |
| C  | 7.34350773620465  | 2.84952835617332   | 3.92020697952645  |
| C  | 9.91732995914609  | 3.86164073070361   | 4.21998835607767  |
| C  | 9.22005236369827  | 4.05322067209939   | 3.00604276947684  |
| H  | 9.70013059775089  | 4.60057241426155   | 2.20420811048772  |
| C  | 11.31073930376466 | 4.38145107495727   | 4.40060513827380  |
| H  | 12.03129436749608 | 3.73755918898886   | 3.88683317563991  |
| H  | 11.56079991508676 | 4.39377231164347   | 5.46290000191670  |
| H  | 11.41400721620754 | 5.38595934631482   | 3.98562369998447  |
| C  | 12.36010039602352 | 0.95366889826838   | 5.37943585836175  |
| N  | 11.94193671156783 | 1.30607949577439   | 6.58164430086185  |
| C  | 10.32586319262931 | -0.351311108504243 | 5.12004218260777  |

|   |                   |                   |                   |
|---|-------------------|-------------------|-------------------|
| H | 9.48637423709591  | 0.34283305705038  | 5.21842150801821  |
| H | 10.57535391949241 | -0.73954533945333 | 6.10367401432326  |
| H | 10.03708727314164 | -1.17327950085112 | 4.46243840847908  |
| N | 11.49820344152094 | 0.30102607536009  | 4.55250729165522  |
| C | 11.41830839558160 | 0.60064688010834  | 3.12623624359081  |
| H | 11.55554259133436 | -0.30222252775241 | 2.52606101769951  |
| H | 12.18315749791573 | 1.32548110869632  | 2.85979603491450  |
| H | 10.43632378442735 | 1.02581837412560  | 2.89898664205798  |
| N | 11.41370606700248 | 3.17102996614540  | 8.43407649667674  |
| N | 13.59731390706844 | 1.24442363540133  | 4.87315535847361  |
| C | 14.38762323209964 | 2.35365356197881  | 5.38447088931861  |
| H | 14.85001982220145 | 2.86966023594175  | 4.53913488655952  |
| H | 15.17374817113844 | 2.01245279578509  | 6.06488144558076  |
| H | 13.74217707353943 | 3.04855705168414  | 5.91587662360281  |
| C | 14.30528611946628 | 0.32769363494166  | 3.98641912979776  |
| H | 14.52302323331813 | 0.79320531588368  | 3.02089562820918  |
| H | 13.70501658128555 | -0.56471006102900 | 3.82815279158437  |
| H | 15.25334870842811 | 0.03894578910516  | 4.45113667236823  |
| C | 12.80359062196621 | 1.38132331498578  | 7.66985485090527  |
| C | 13.86864337524144 | 0.52324017686624  | 7.90316916457993  |
| H | 14.09573256881785 | -0.24647771082609 | 7.17514927010444  |
| C | 14.64053421968958 | 0.62220079344538  | 9.07309907469742  |
| H | 15.46260181640061 | -0.06818919291845 | 9.21912050823549  |
| C | 14.36375372081991 | 1.57046749236763  | 10.03019538982876 |
| H | 14.96106870523704 | 1.64677180199052  | 10.93052461066111 |
| C | 13.27751981451801 | 2.45364115127095  | 9.84163326007219  |
| C | 12.49245688690717 | 2.35519632322267  | 8.66476491515576  |
| C | 12.91218738551310 | 3.45364833051135  | 10.77473651611791 |
| H | 13.48559460275222 | 3.56354949138527  | 11.68818406652491 |
| C | 11.84628559300601 | 4.27185109052168  | 10.51259975638789 |
| H | 11.55923593408987 | 5.04959743654643  | 11.20971478946372 |
| C | 11.10177340143332 | 4.10928943719177  | 9.32165689529576  |
| C | 9.93531826973847  | 5.00030940258471  | 9.01922050769129  |
| H | 10.25885185438978 | 6.04173514972308  | 8.93801130411959  |
| H | 9.18769878317207  | 4.95471255116376  | 9.81547353927639  |
| H | 9.47812511009542  | 4.69656073552015  | 8.07622530403965  |

**[8]<sup>+</sup> - T<sub>1</sub> (S = 2)**

Eh = -3246.485773029048

|    |                   |                   |                   |
|----|-------------------|-------------------|-------------------|
| Cu | 10.31939386379718 | 2.59712057893128  | 6.88720183641506  |
| C  | 7.96303459006977  | 1.99140167418036  | 8.64565182997308  |
| N  | 8.44747541263532  | 2.04785716597923  | 7.40571590242867  |
| C  | 9.56258593364414  | 0.22634088965129  | 9.21215476205577  |
| H  | 9.34544637913433  | -0.08293105012692 | 8.19407344575058  |
| H  | 9.40936430991101  | -0.61305920973755 | 9.89476380158556  |
| H  | 10.60363245452646 | 0.54942684493561  | 9.27746567865379  |
| N  | 8.65160935028553  | 1.30253759206238  | 9.58548351954943  |
| C  | 8.70454956055197  | 1.70963366921167  | 10.98549150093350 |
| H  | 9.75053464295416  | 1.83960086459952  | 11.27281869556037 |
| H  | 8.25074442349934  | 0.95803780355701  | 11.63638940531591 |
| H  | 8.18609581082699  | 2.65627371990026  | 11.11326705144897 |
| N  | 6.82121868347343  | 2.62302026987976  | 9.03331162117792  |
| N  | 9.46747002195892  | 3.06442812033233  | 5.19197589855337  |
| C  | 5.89888826835658  | 2.04134888287828  | 10.00428811566649 |
| H  | 4.91411465889021  | 1.94334067058958  | 9.53832059965264  |
| H  | 5.80087220998023  | 2.67282633501871  | 10.89103429834577 |
| H  | 6.24792521377117  | 1.05507798012916  | 10.29916002800612 |

|   |                   |                   |                   |
|---|-------------------|-------------------|-------------------|
| C | 6.32485879289344  | 3.80338625130318  | 8.33422598247786  |
| H | 7.11208330447963  | 4.22150179017206  | 7.71322460787984  |
| H | 6.02029169342838  | 4.54253021849104  | 9.07895326660621  |
| H | 5.46956273706906  | 3.55714198766899  | 7.70017447813303  |
| C | 7.59752962226584  | 2.08192288253107  | 6.28773686649230  |
| C | 6.31523953674853  | 1.53461092309689  | 6.22630108656952  |
| H | 5.89092911892635  | 1.05281569825032  | 7.09827993697884  |
| C | 5.58132523727947  | 1.59236815170562  | 5.03716855011894  |
| H | 4.58850817020301  | 1.15980656971423  | 5.01096659543930  |
| C | 6.09663539079097  | 2.19802976583524  | 3.90635938065776  |
| H | 5.50868640358029  | 2.26819900548960  | 2.99940287183012  |
| C | 8.01481014880184  | 3.38289252620911  | 2.82420116213763  |
| H | 7.46669390977866  | 3.50101555482771  | 1.89764235490122  |
| C | 8.16232220838575  | 2.63362287022978  | 5.11821691805118  |
| C | 7.40300726513221  | 2.73178350846298  | 3.92224061309035  |
| C | 10.02160389378827 | 3.70673752050094  | 4.13611387402398  |
| C | 9.29909494394057  | 3.88932322642718  | 2.95871620816855  |
| H | 9.76523187640253  | 4.42752152234593  | 2.14258786102576  |
| C | 11.42464680144077 | 4.20952016289409  | 4.28447909995164  |
| H | 12.15720287144514 | 3.45155475709826  | 3.99389617003678  |
| H | 11.62555325809477 | 4.48575781229346  | 5.32308436205006  |
| H | 11.58749749696883 | 5.08216429002475  | 3.65117122737246  |
| C | 12.34666352900450 | 1.08502767759480  | 5.28652312694980  |
| N | 11.94320422365099 | 1.47079818340945  | 6.49674892749785  |
| C | 10.30137268199524 | -0.22907853606126 | 5.02362640852858  |
| H | 9.39915240793285  | 0.38335521366356  | 4.96219537829922  |
| H | 10.49965553424446 | -0.47658398267034 | 6.06238779505873  |
| H | 10.14559753502960 | -1.14547652388853 | 4.44986616658222  |
| N | 11.45812446857166 | 0.46899283381588  | 4.47241987218018  |
| C | 11.44341795076495 | 0.66097020506352  | 3.02564016759441  |
| H | 11.63508129655134 | -0.27689966425882 | 2.49840677443206  |
| H | 12.19514106892848 | 1.39324572996193  | 2.74328945863801  |
| H | 10.46082675469518 | 1.03709572050699  | 2.73188365173987  |
| N | 11.30735816920251 | 3.05899561754666  | 8.50840461828904  |
| N | 13.60097081115551 | 1.30433954093850  | 4.80756673342976  |
| C | 14.43433948889306 | 2.38996259778294  | 5.31158284472274  |
| H | 14.88673699890557 | 2.90387284811344  | 4.46008747081894  |
| H | 15.22420566412846 | 2.01013464750872  | 5.96416795708646  |
| H | 13.82338847350609 | 3.09107369683732  | 5.87282282773123  |
| C | 14.27682356384862 | 0.35451438920330  | 3.92834916027626  |
| H | 14.47837942956763 | 0.78896480406207  | 2.94580286945934  |
| H | 13.66496301583676 | -0.53642795584785 | 3.81178803622006  |
| H | 15.23016850547750 | 0.07302814276029  | 4.38414756560545  |
| C | 12.80322847565549 | 1.44202027062463  | 7.60591207565920  |
| C | 13.88845857034031 | 0.58024257645072  | 7.76747104596679  |
| H | 14.13889476261347 | -0.12592670923134 | 6.98568139241512  |
| C | 14.64312164492272 | 0.61242955095304  | 8.94461197436466  |
| H | 15.48037894063091 | -0.06663621669633 | 9.05098397571023  |
| C | 14.34475994127775 | 1.49897846267132  | 9.96232466912495  |
| H | 14.95391263289553 | 1.53960062277469  | 10.85701584735303 |
| C | 13.23449154863691 | 2.36264938444800  | 9.84640184358425  |
| C | 12.44428022457846 | 2.29894412120247  | 8.66809502182980  |
| C | 12.85509291569400 | 3.31407874478070  | 10.82357517844074 |
| H | 13.43946059267096 | 3.41407912678775  | 11.72989510649996 |
| C | 11.75736887513444 | 4.12983671257302  | 10.59320289287602 |
| H | 11.48069398061502 | 4.89283336363177  | 11.31029049895442 |
| C | 10.98195817115718 | 3.98175064830517  | 9.44448342945813  |

|   |                  |                  |                  |
|---|------------------|------------------|------------------|
| C | 9.77051927082900 | 4.82751524345390 | 9.19866037687819 |
| H | 9.86168048321227 | 5.78527130853321 | 9.71177672460910 |
| H | 8.86094115450158 | 4.34413978430961 | 9.56531388452229 |
| H | 9.64008577263025 | 5.01239002084040 | 8.12891178554550 |

[9]<sup>2+</sup> - D<sup>∞</sup> (S = 1)

Eh = -3403.577411117799

|    |                   |                   |                   |
|----|-------------------|-------------------|-------------------|
| Cu | 10.31452058367590 | 2.83701333261377  | 6.83991753237119  |
| C  | 7.98573621809186  | 1.83982010260959  | 8.57107216856986  |
| N  | 8.50616553678646  | 2.09630143319981  | 7.35454379091974  |
| C  | 9.73362124402458  | 0.18204050384901  | 9.05351758539343  |
| H  | 9.78704557402975  | 0.15782202635907  | 7.97138915827508  |
| H  | 9.46142831764856  | -0.80539118316209 | 9.43506810500921  |
| H  | 10.70769241468843 | 0.45694363434146  | 9.45887414881176  |
| N  | 8.72406181276394  | 1.15154030523916  | 9.46644805232983  |
| C  | 8.59362244309674  | 1.30299709646164  | 10.91477305054276 |
| H  | 9.58733330126633  | 1.49440574795946  | 11.32585893129820 |
| H  | 8.19653394425455  | 0.39504719899942  | 11.37393118687921 |
| H  | 7.94770682822366  | 2.14236365978454  | 11.14897063082456 |
| N  | 6.75687518152279  | 2.27383047081228  | 8.94289823470972  |
| N  | 9.42371625721941  | 3.29196629330280  | 5.10756863679608  |
| C  | 5.86817294222531  | 1.49250061462526  | 9.80742609065159  |
| H  | 4.91701333012806  | 1.35916619275002  | 9.28611487543162  |
| H  | 5.67517849636704  | 2.00580970716873  | 10.75155655674949 |
| H  | 6.30109428293839  | 0.51541725899814  | 10.00320817761792 |
| C  | 6.13409762626609  | 3.44580311657297  | 8.33184916907119  |
| H  | 6.87930190374677  | 4.01911303627625  | 7.78895431804759  |
| H  | 5.70997698424680  | 4.06305624005202  | 9.12596808220551  |
| H  | 5.33742759009067  | 3.14997722022148  | 7.64552896675386  |
| C  | 7.69167690957427  | 2.04448880149359  | 6.21734226860634  |
| C  | 6.50938586572935  | 1.32240863172397  | 6.11929799998109  |
| H  | 6.15121980436496  | 0.76558629362282  | 6.97516054756489  |
| C  | 5.77084383150701  | 1.28033356304161  | 4.92660355021405  |
| H  | 4.85321790501943  | 0.70619528907279  | 4.89756092372373  |
| C  | 6.19374985339302  | 1.96434861942299  | 3.81264781129685  |
| H  | 5.61258213506680  | 1.96560072788369  | 2.89920035603983  |
| C  | 7.91786868975043  | 3.39770957029004  | 2.75552342822300  |
| H  | 7.34404471879661  | 3.44075578912247  | 1.83689921742007  |
| C  | 8.18376305356591  | 2.68569764473823  | 5.04835938172098  |
| C  | 7.41305135477539  | 2.67246973420894  | 3.85735497059412  |
| C  | 9.88118037830141  | 3.96735646189895  | 4.05279189802783  |
| C  | 9.11201360172069  | 4.04995567922011  | 2.86692306215866  |
| H  | 9.49784333597594  | 4.64092043833835  | 2.04614480055799  |
| C  | 12.25998267184473 | 1.05869774562929  | 5.26868066351667  |
| N  | 11.84973494505753 | 1.58940300524658  | 6.43696294815465  |
| C  | 10.11744641006765 | -0.10142024807783 | 4.93710948248051  |
| H  | 9.25731453952349  | 0.32000451469406  | 4.41706715181672  |
| H  | 10.02391065921474 | 0.08900375193213  | 5.99995370609141  |
| H  | 10.14545535537675 | -1.17857519796415 | 4.75183061179723  |
| N  | 11.34587913858326 | 0.51022278071982  | 4.44022175700557  |
| C  | 11.50663885693594 | 0.44168335846119  | 2.98884316155217  |
| H  | 11.64192971889015 | -0.58846131518485 | 2.65173182500508  |
| H  | 12.35539499167294 | 1.04007615321180  | 2.67476669245545  |
| H  | 10.60035149405429 | 0.84027001819570  | 2.52786174198434  |
| N  | 11.33534100173953 | 3.27088545545819  | 8.50675288073470  |
| N  | 13.55576333119771 | 1.07904881911265  | 4.87025791692878  |

|   |                   |                   |                   |
|---|-------------------|-------------------|-------------------|
| C | 14.50013702983590 | 2.09009842446166  | 5.33915994858715  |
| H | 15.06085512248844 | 2.46148137436247  | 4.47932833997905  |
| H | 15.19862971361739 | 1.66544928230628  | 6.06377035003136  |
| H | 13.96460780280094 | 2.91392319519540  | 5.79974264533862  |
| C | 14.17267738607526 | -0.02960458612971 | 4.13611932004461  |
| H | 14.50274380910037 | 0.28273782114043  | 3.14339373544911  |
| H | 13.47267740246608 | -0.85560770872157 | 4.04655866972656  |
| H | 15.04580548493229 | -0.36700150066993 | 4.70020324320685  |
| C | 12.64178930271129 | 1.46641232155177  | 7.58431872973262  |
| C | 13.58368859585850 | 0.46698538826451  | 7.79224473598711  |
| H | 13.75105877463943 | -0.27594649937679 | 7.02344843500722  |
| C | 14.31780609400153 | 0.38400138535939  | 8.98516304315328  |
| H | 15.04258954318066 | -0.41202446685876 | 9.10150894413622  |
| C | 14.13260867189160 | 1.30378286354542  | 9.98849775037960  |
| H | 14.71898097727933 | 1.26962664428250  | 10.89800256053445 |
| C | 13.15142632545023 | 2.30568895527799  | 9.83579473286411  |
| C | 12.37292559698321 | 2.36755128799035  | 8.65121129670090  |
| C | 12.90211093379949 | 3.28395400175530  | 10.82279616330272 |
| H | 13.49808220973553 | 3.29266007511885  | 11.72819885121005 |
| C | 11.92497432831575 | 4.21479104630122  | 10.61815569421369 |
| H | 11.73933261206783 | 4.99150950544907  | 11.34904457198171 |
| C | 11.11471948120164 | 4.18114505390554  | 9.45695336642220  |
| C | 11.20696916139749 | 4.70248062916718  | 4.02820319307578  |
| H | 10.95814678739787 | 5.67862869857838  | 3.59622828556707  |
| C | 12.19175450047706 | 4.02910945085071  | 3.05616350459751  |
| C | 11.86875083909828 | 4.95464170937992  | 5.37365130365296  |
| H | 11.20612870194958 | 5.48461519193180  | 6.05276304102471  |
| H | 12.18480934404883 | 4.02462628181091  | 5.85120731450650  |
| H | 12.76003112684820 | 5.56826604874840  | 5.23118651694257  |
| H | 12.53945790443293 | 3.08056483893529  | 3.46628962255596  |
| H | 13.05861513734117 | 4.67526100949472  | 2.91058368979140  |
| H | 11.74154084732552 | 3.84053405224632  | 2.08093515556537  |
| C | 10.00692878473887 | 5.21872158181125  | 9.41746976893101  |
| H | 10.47464717316718 | 6.12128005413878  | 9.82440345840735  |
| C | 8.88467374392786  | 4.83152007136302  | 10.39734339573649 |
| C | 9.43445310596355  | 5.58680204574387  | 8.05550135507134  |
| H | 10.16880228748537 | 6.10275990560852  | 7.44091428063770  |
| H | 9.06322987449322  | 4.71468778795303  | 7.50903148049017  |
| H | 8.58957918300591  | 6.26420715118783  | 8.19237782872894  |
| H | 9.27817137560752  | 4.56024676723664  | 11.37789331735545 |
| H | 8.31483479036610  | 3.98927651019345  | 10.00707523950112 |
| H | 8.20526751849126  | 5.67548392856038  | 10.52465878095831 |

**[9]<sup>0</sup> - D<sup>red</sup> (S = 1)**

Eh = -3403.989357382413

|    |                   |                   |                   |
|----|-------------------|-------------------|-------------------|
| Cu | 10.33022331612197 | 2.73827796983568  | 6.98551347652745  |
| C  | 7.87617154399871  | 1.63198148632575  | 8.47125943800258  |
| N  | 8.46241033150720  | 1.88068017675540  | 7.32067770450273  |
| C  | 9.73240147624045  | 0.17235215166137  | 9.12628485546980  |
| H  | 9.82017522837567  | 0.08534278259583  | 8.04945205530820  |
| H  | 9.66471778902770  | -0.81723528139520 | 9.58971420879460  |
| H  | 10.62631796791817 | 0.67746972825187  | 9.50045109730320  |
| N  | 8.53729303958589  | 0.93584813784285  | 9.44326122272380  |
| C  | 8.32258852668432  | 1.17015139289336  | 10.86248912212135 |
| H  | 9.26404341788238  | 1.48379550844161  | 11.32348463620564 |
| H  | 7.97964416680574  | 0.25835785418402  | 11.36269938868698 |
| H  | 7.58509766904002  | 1.95562680614642  | 11.00080704850907 |



|   |                   |                   |                   |
|---|-------------------|-------------------|-------------------|
| N | 6.61743057545796  | 2.08646881010704  | 8.82013939756303  |
| N | 9.44974819363775  | 3.38755202804111  | 5.24587064309116  |
| C | 5.64068649063551  | 1.20619354219022  | 9.44026571487342  |
| H | 4.83133512675299  | 0.98655751857771  | 8.73249091966583  |
| H | 5.20244965328517  | 1.66736956419059  | 10.33150845099991 |
| H | 6.11739965201718  | 0.27050235072153  | 9.72439345584147  |
| C | 6.07040842681502  | 3.28448243454895  | 8.20553481350717  |
| H | 6.88137138507514  | 3.88720472003176  | 7.80401946387166  |
| H | 5.54457196089923  | 3.85947267885849  | 8.97383308097914  |
| H | 5.37669152597343  | 3.04564893807602  | 7.39300818593406  |
| C | 7.70282056141286  | 1.98183459931975  | 6.15445094489283  |
| C | 6.53402346160751  | 1.23595405486524  | 5.94506644654384  |
| H | 6.20996230267971  | 0.54837076359629  | 6.71674815046198  |
| C | 5.80239132428304  | 1.35224958059630  | 4.76574073113888  |
| H | 4.90120834552860  | 0.76327842950766  | 4.63620726774335  |
| C | 6.21898105763841  | 2.21522858258803  | 3.76944072130580  |
| H | 5.64491470434028  | 2.33523462910891  | 2.85767541591623  |
| C | 7.90688051233507  | 3.81404393382728  | 2.91867147344887  |
| H | 7.32159334474445  | 3.98240144219200  | 2.02190819566257  |
| C | 8.20932325138297  | 2.79364157260226  | 5.09905322156591  |
| C | 7.42389750329500  | 2.93603915499545  | 3.91397368894161  |
| C | 9.89705385423633  | 4.18227017173847  | 4.24823804665809  |
| C | 9.12399364382593  | 4.43333433151661  | 3.10802852993332  |
| H | 9.52219260296015  | 5.10425307348984  | 2.35484024903015  |
| C | 12.27930819548725 | 0.82413225873700  | 5.57931201672910  |
| N | 11.84467161506013 | 1.29393973078885  | 6.72693741112807  |
| C | 10.17764622117107 | -0.36893728801376 | 5.29917835669367  |
| H | 9.40321498016689  | 0.39939521684348  | 5.35668858121871  |
| H | 10.36146606847694 | -0.76201317291965 | 6.29585292398203  |
| H | 9.83101590040799  | -1.17724676144727 | 4.65085737006207  |
| N | 11.42372592329763 | 0.14520667957036  | 4.75333683079006  |
| C | 11.41400447316306 | 0.34805425505895  | 3.30961562376983  |
| H | 11.35323812644444 | -0.61557933991906 | 2.79586670837680  |
| H | 12.32081539901663 | 0.86000764414214  | 3.00165576510147  |
| H | 10.55016848089555 | 0.95570155314558  | 3.01919189456450  |
| N | 11.46370830408270 | 3.30884192792347  | 8.57007675242332  |
| N | 13.56577247678992 | 0.97582049027800  | 5.10024804372189  |
| C | 14.41584284559114 | 2.06076064664322  | 5.55913209526138  |
| H | 14.96543166344356 | 2.45852562863077  | 4.70071484451217  |
| H | 15.12713954150427 | 1.72625681596237  | 6.32113316459679  |
| H | 13.80160059310086 | 2.85091660917156  | 5.98156891813754  |
| C | 14.26014365531909 | -0.11235376526482 | 4.43247298291317  |
| H | 14.66003101445449 | 0.20887380868421  | 3.46478286864294  |
| H | 13.57334652796363 | -0.94112529670568 | 4.27648379042359  |
| H | 15.09704379969730 | -0.45616803870035 | 5.05322676081535  |
| C | 12.71196031922388 | 1.37800660802553  | 7.81954681457605  |
| C | 13.68918596010494 | 0.40664798621544  | 8.06946525717477  |
| H | 13.77289742416186 | -0.43421654789929 | 7.39106837090703  |
| C | 14.53820748608431 | 0.50292076185591  | 9.17024244777441  |
| H | 15.28662060688418 | -0.26374617087087 | 9.33702813719309  |
| C | 14.43091659044481 | 1.57060534204739  | 10.04120711637640 |
| H | 15.09996848268431 | 1.66935845542642  | 10.88855646174782 |
| C | 13.42523440759904 | 2.54389106804376  | 9.85306373181257  |
| C | 12.52202245953991 | 2.43667987663518  | 8.75118173854964  |
| C | 13.26160966600987 | 3.64553237056310  | 10.72122494542451 |
| H | 13.94704359426310 | 3.78251812888791  | 11.54970049474670 |
| C | 12.21707153026782 | 4.52187757328098  | 10.50200150186470 |

|   |                   |                  |                   |
|---|-------------------|------------------|-------------------|
| H | 12.05969777310069 | 5.36641869109949 | 11.16315926524862 |
| C | 11.31414849499351 | 4.32468317855424 | 9.45224807900991  |
| C | 11.30441753597897 | 4.75904625862348 | 4.21924320207775  |
| H | 11.21730741593733 | 5.69078640829938 | 3.64909739396212  |
| C | 12.21786925583167 | 3.82622274760251 | 3.40746241201437  |
| C | 11.94966355233521 | 5.09819033374274 | 5.55482925003010  |
| H | 11.41949724697490 | 5.90413810681414 | 6.05658317168395  |
| H | 11.96042407512117 | 4.23796034391456 | 6.23029519832710  |
| H | 12.98197002864628 | 5.42033016693060 | 5.39126890465431  |
| H | 12.34853869519286 | 2.88085447519571 | 3.93244840912888  |
| H | 13.20339418270143 | 4.28177284130717 | 3.27325909670920  |
| H | 11.79394776586383 | 3.61646557361599 | 2.42315306657460  |
| C | 10.08457492442449 | 5.21526532560677 | 9.43669937213043  |
| H | 10.34460226647376 | 6.07736582465563 | 10.05945872669610 |
| C | 8.92387018267840  | 4.48746363558096 | 10.12754115480704 |
| C | 9.64119655025386  | 5.74495401028023 | 8.07631061321152  |
| H | 10.38171928871027 | 6.42918155087876 | 7.66223742855892  |
| H | 9.48683676916151  | 4.92922042641381 | 7.36353659848561  |
| H | 8.69876652219460  | 6.28987480383305 | 8.18207753848832  |
| H | 8.63032001681303  | 3.62264697004966 | 9.53437432997961  |
| H | 8.05804951024356  | 5.14898920163722 | 10.22477905454589 |
| H | 9.21261317955720  | 4.14199745171641 | 11.12240654793726 |

[9]<sup>+</sup> - s<sub>0</sub> (s = 0)

Eh = -3403.872121873042

|    |                   |                   |                   |
|----|-------------------|-------------------|-------------------|
| Cu | 10.33037625280999 | 2.71465291691518  | 6.98509220536361  |
| C  | 7.85692910850407  | 1.68262769346185  | 8.49295905514838  |
| N  | 8.44739407899479  | 1.95191983150282  | 7.33679293260944  |
| C  | 9.68230693190569  | 0.16689505793657  | 9.10501342747619  |
| H  | 9.81834973910921  | 0.17673779517489  | 8.02976058805624  |
| H  | 9.53128411286735  | -0.85478172952221 | 9.46529269240428  |
| H  | 10.58039684613269 | 0.57622671245930  | 9.57358112791623  |
| N  | 8.52510093562418  | 0.98120666318168  | 9.44399655089390  |
| C  | 8.29044553230240  | 1.14908671220257  | 10.87267475249071 |
| H  | 9.24172556288101  | 1.38118498916117  | 11.35837309127608 |
| H  | 7.88899440492237  | 0.23496063579169  | 11.31893424230532 |
| H  | 7.59892070300674  | 1.96880095636156  | 11.04272875456966 |
| N  | 6.61135965896322  | 2.14419936149190  | 8.83579992728504  |
| N  | 9.44807073610376  | 3.39303237800780  | 5.22212674458368  |
| C  | 5.63845955755619  | 1.30179126644859  | 9.52339300898114  |
| H  | 4.78114276367373  | 1.13023640839411  | 8.86348301836972  |
| H  | 5.27867631229864  | 1.77657383474088  | 10.44003984432036 |
| H  | 6.08530471460546  | 0.34162106034023  | 9.76877873094848  |
| C  | 6.05985689611230  | 3.34186830980534  | 8.21885548099038  |
| H  | 6.86543040644909  | 3.94058981291744  | 7.80134405087974  |
| H  | 5.54539375585409  | 3.92077613236491  | 8.98960764527326  |
| H  | 5.35051999398480  | 3.09614829552895  | 7.42288721209339  |
| C  | 7.69747261869375  | 2.01327615997030  | 6.16778236504774  |
| C  | 6.53504666590141  | 1.27824462881962  | 5.95911351040947  |
| H  | 6.18276272717217  | 0.62507543960036  | 6.74767868625307  |
| C  | 5.81568817452821  | 1.35065303069308  | 4.75874394326868  |
| H  | 4.91090319676232  | 0.76522778344549  | 4.64766765597365  |
| C  | 6.25060593971228  | 2.15643390412394  | 3.73528164591174  |
| H  | 5.69602922157928  | 2.23943400339571  | 2.80854078727488  |
| C  | 7.96822460468351  | 3.69307065517452  | 2.84925182131151  |
| H  | 7.40248095732391  | 3.81169214317746  | 1.93206288533605  |
| C  | 8.21519962188900  | 2.78562228172596  | 5.08027173070404  |

|   |                   |                   |                   |
|---|-------------------|-------------------|-------------------|
| C | 7.45822492294541  | 2.87170881282707  | 3.87965644375009  |
| C | 9.91388245897334  | 4.12875913500030  | 4.21633338594178  |
| C | 9.16482842726623  | 4.31964995485056  | 3.02752963977256  |
| H | 9.57647327092166  | 4.95835605936260  | 2.25538506325608  |
| C | 12.31003426528447 | 0.86126607385849  | 5.54890406837959  |
| N | 11.87771858624508 | 1.34905440139919  | 6.70188726542592  |
| C | 10.23278342620268 | -0.38380655268009 | 5.32707855089143  |
| H | 9.43299357806594  | 0.35626415807819  | 5.40072634435537  |
| H | 10.45374747012610 | -0.77115313180241 | 6.31820884837602  |
| H | 9.90273171455196  | -1.20436743748047 | 4.68771995055176  |
| N | 11.44494572537490 | 0.17971101047413  | 4.75034906060148  |
| C | 11.42885542282755 | 0.31866434432500  | 3.29772036714367  |
| H | 11.44056371049179 | -0.66372102967656 | 2.81969532196976  |
| H | 12.29196932409286 | 0.88731262901403  | 2.96655382122385  |
| H | 10.52094401575660 | 0.84790269027595  | 2.99093371056970  |
| N | 11.47076569235981 | 3.31686052504080  | 8.58858364811974  |
| N | 13.58423081094827 | 1.01993164976022  | 5.07132596785953  |
| C | 14.44609381333502 | 2.09673319306565  | 5.53422960980669  |
| H | 14.98537950879888 | 2.50238324571319  | 4.67491828669776  |
| H | 15.16928376712039 | 1.74416198690630  | 6.27567701263963  |
| H | 13.84272377847756 | 2.88352887226647  | 5.97762271514455  |
| C | 14.26263914773105 | -0.03084691475439 | 4.32045396593636  |
| H | 14.57401661431489 | 0.32339287547173  | 3.33380148801591  |
| H | 13.60091317101715 | -0.88530353763709 | 4.20364638028695  |
| H | 15.15517583902290 | -0.34510386069450 | 4.87134495673935  |
| C | 12.72757406313233 | 1.40335574000281  | 7.80237157844242  |
| C | 13.70119708108284 | 0.44472055220023  | 8.05512925333600  |
| H | 13.81582380027050 | -0.37651530757448 | 7.35781210440316  |
| C | 14.53042853555168 | 0.51080093795317  | 9.18345071374316  |
| H | 15.28008187856178 | -0.25617899696949 | 9.33634256498949  |
| C | 14.39665399988809 | 1.53864163975651  | 10.08446362490713 |
| H | 15.04080184611575 | 1.61394732203031  | 10.95208503097330 |
| C | 13.38702729250288 | 2.50660384127818  | 9.89296646604035  |
| C | 12.51970506077220 | 2.43674069751393  | 8.76805971063922  |
| C | 13.18959956392857 | 3.57278035980180  | 10.79777597137512 |
| H | 13.84847138801883 | 3.67652393196434  | 11.65246434005022 |
| C | 12.16851404268928 | 4.45167266783209  | 10.58305355167739 |
| H | 11.99417975734980 | 5.27623505318435  | 11.26325093646955 |
| C | 11.29302773238534 | 4.29000313062891  | 9.48092463600314  |
| C | 11.30018507031599 | 4.74984094872173  | 4.20011327420432  |
| H | 11.17714140593549 | 5.70299959920348  | 3.67427601257002  |
| C | 12.22296571866480 | 3.87756535448716  | 3.33073512464666  |
| C | 11.94763896733664 | 5.04234697490286  | 5.54367364384785  |
| H | 11.40041285718434 | 5.80661389713453  | 6.08896879981360  |
| H | 11.99404362486578 | 4.15025499311984  | 6.17359797632156  |
| H | 12.96615494417134 | 5.40414089120103  | 5.38422760647021  |
| H | 12.40909983871882 | 2.92305117514454  | 3.82258711868130  |
| H | 13.18087829254099 | 4.38112283410017  | 3.18423760511856  |
| H | 11.78516181775495 | 3.67970668028630  | 2.35043744366839  |
| C | 10.08534024286898 | 5.21064285643512  | 9.45735640888679  |
| H | 10.38256211106226 | 6.09494348890925  | 10.02892494752525 |
| C | 8.94351180511676  | 4.53275912829426  | 10.23038205257127 |
| C | 9.60728775772607  | 5.68322757943818  | 8.08998214385321  |
| H | 10.33314808980071 | 6.35396419096388  | 7.63178329962132  |
| H | 9.43510763757835  | 4.84269247600591  | 7.41129918785773  |
| H | 8.66929345161649  | 6.23194955521480  | 8.20251509700434  |
| H | 8.61327438328020  | 3.64720373890281  | 9.69070405874353  |

|   |                  |                  |                   |
|---|------------------|------------------|-------------------|
| H | 8.09694614238704 | 5.21597693146529 | 10.32747673727960 |
| H | 9.26190210364212 | 4.23238985870777 | 11.23066598908190 |

**[9]<sup>+</sup> - T<sub>1</sub> (S = 2)**

Eh = -3403.805693065654

|    |                   |                   |                   |
|----|-------------------|-------------------|-------------------|
| Cu | 10.31875850953606 | 2.88993475972451  | 6.85172824449710  |
| C  | 8.00193127690695  | 1.84329958743233  | 8.57101559131739  |
| N  | 8.50637432394055  | 2.11396916784490  | 7.36590700407270  |
| C  | 9.81960539183248  | 0.26937902167953  | 9.08072587937303  |
| H  | 9.93086752433265  | 0.30073006135721  | 8.00295757739356  |
| H  | 9.57177714368246  | -0.74582108126640 | 9.40549072023345  |
| H  | 10.76171341538948 | 0.56641775434911  | 9.54128137390327  |
| N  | 8.75608436557728  | 1.18140954742519  | 9.48001272281671  |
| C  | 8.61077926735376  | 1.34707406540455  | 10.92117859937369 |
| H  | 9.58522492818203  | 1.61179946544704  | 11.33878081473165 |
| H  | 8.26956179013540  | 0.42103080221218  | 11.39207272123523 |
| H  | 7.90610003422873  | 2.14346270077788  | 11.13724976023783 |
| N  | 6.75161181982851  | 2.23344789369455  | 8.95424679894654  |
| N  | 9.45724638192383  | 3.27763001291455  | 5.12881452010457  |
| C  | 5.87643105920333  | 1.38233682950913  | 9.75411082397566  |
| H  | 4.96508063213372  | 1.17827624798690  | 9.18345007829110  |
| H  | 5.59505263656242  | 1.86821373278717  | 10.69189601591122 |
| H  | 6.37103625508705  | 0.43898014122163  | 9.97055889003674  |
| C  | 6.10438398559209  | 3.39466240265040  | 8.35642139152103  |
| H  | 6.84392717577914  | 3.99642046222845  | 7.83627510492623  |
| H  | 5.65170130312255  | 3.98838768540515  | 9.15412948252949  |
| H  | 5.33096369856635  | 3.09227087596057  | 7.64568105469233  |
| C  | 7.69508759834818  | 2.06094896926058  | 6.22273426723760  |
| C  | 6.51168175572108  | 1.32176625396193  | 6.12928834053951  |
| H  | 6.16047875717028  | 0.76355669319187  | 6.98688241889598  |
| C  | 5.79287825578946  | 1.26890513362761  | 4.93453858876545  |
| H  | 4.87890924461593  | 0.68878101629960  | 4.89265485431369  |
| C  | 6.23285065650360  | 1.94815621420345  | 3.81562135112100  |
| H  | 5.66414776913739  | 1.93215684401570  | 2.89398560789222  |
| C  | 7.97930374480083  | 3.35121292258133  | 2.74239623547779  |
| H  | 7.42287424249773  | 3.37963976891187  | 1.81359554969062  |
| C  | 8.20479809021539  | 2.68875795817177  | 5.06141802536872  |
| C  | 7.44968895808611  | 2.65902753685694  | 3.85546618418838  |
| C  | 9.93836873536382  | 3.93981542354873  | 4.04669555215201  |
| C  | 9.19251402918857  | 3.99669018132015  | 2.86572105036614  |
| H  | 9.59363795579524  | 4.56662719265611  | 2.03627011102204  |
| C  | 12.20608110387216 | 1.04891483980486  | 5.28719624738348  |
| N  | 11.81795359124822 | 1.55652855892613  | 6.45817428451139  |
| C  | 10.05042354581008 | -0.08551205770418 | 4.95111213249784  |
| H  | 9.18051436837174  | 0.43725312229200  | 4.55384207052487  |
| H  | 10.03665971019105 | -0.02668693350295 | 6.03345667070483  |
| H  | 10.00693205678721 | -1.13212972607579 | 4.63464940642664  |
| N  | 11.28116766973264 | 0.51355087014969  | 4.45407416539170  |
| C  | 11.38813586959168 | 0.55601150733187  | 3.00080534857648  |
| H  | 11.42141094323199 | -0.45298330182954 | 2.58077246109047  |
| H  | 12.28040665459598 | 1.09788549644769  | 2.70549233160153  |
| H  | 10.51204945433027 | 1.07437057257958  | 2.60253250004099  |
| N  | 11.31960555062098 | 3.26335682154115  | 8.49895812222710  |
| N  | 13.50159442175835 | 1.05227227074037  | 4.85866149426315  |
| C  | 14.46869809549316 | 2.03741120050621  | 5.32583572722075  |
| H  | 15.01907802822265 | 2.42038085135245  | 4.46293073707059  |
| H  | 15.17145279926364 | 1.59196060271997  | 6.03440338856586  |

|   |                   |                   |                   |
|---|-------------------|-------------------|-------------------|
| H | 13.95358982876087 | 2.85889176506447  | 5.81331055855103  |
| C | 14.07863437838400 | -0.06809686168486 | 4.12194947210278  |
| H | 14.43996347874973 | 0.24474522166276  | 3.13871138053724  |
| H | 13.33720269494080 | -0.85348915771076 | 4.00041637182042  |
| H | 14.92509273319104 | -0.46484355972270 | 4.69066684118797  |
| C | 12.63636605615394 | 1.45939943455868  | 7.59338790919425  |
| C | 13.58497311757143 | 0.45037528602856  | 7.78993829212973  |
| H | 13.72766735776488 | -0.30369446088120 | 7.02672348335635  |
| C | 14.33115664942357 | 0.38958324360627  | 8.96670550800014  |
| H | 15.05840137618489 | -0.40344023241465 | 9.09248471109771  |
| C | 14.15464856393259 | 1.33197931696451  | 9.96103640104030  |
| H | 14.75445277878849 | 1.30925972953235  | 10.86267560387674 |
| C | 13.17121948402996 | 2.33251055435735  | 9.82037094883104  |
| C | 12.37414943183299 | 2.37356477412110  | 8.64199466692487  |
| C | 12.92785665342044 | 3.31892792168396  | 10.80234600189605 |
| H | 13.53440257810096 | 3.34494882064102  | 11.69929730847031 |
| C | 11.92854754973939 | 4.24742785266855  | 10.59096048950142 |
| H | 11.74800420477196 | 5.03012423782458  | 11.31805748874032 |
| C | 11.10894021506148 | 4.20140947872712  | 9.46013635770514  |
| C | 11.26204119658120 | 4.68717479808469  | 4.04656509810195  |
| H | 11.02046016235703 | 5.66543941339455  | 3.61500574738273  |
| C | 12.28336844422759 | 4.03274209133622  | 3.10243681287782  |
| C | 11.89157246620726 | 4.94354912059026  | 5.40729781154220  |
| H | 11.20924891371547 | 5.46763318463436  | 6.07124424564352  |
| H | 12.20010493607739 | 4.01548738029871  | 5.89493538204366  |
| H | 12.78536025073866 | 5.56021893611021  | 5.28985007746930  |
| H | 12.62934785091240 | 3.08421717733146  | 3.51401292321665  |
| H | 13.15045014537672 | 4.68659402376688  | 2.98250409224630  |
| H | 11.85775184692067 | 3.84506337175784  | 2.11580200143890  |
| C | 9.98527953869802  | 5.22566616837360  | 9.41648376053019  |
| H | 10.42702187357195 | 6.12741611562791  | 9.85295564763936  |
| C | 8.83195601143156  | 4.81626385095061  | 10.34684338332298 |
| C | 9.44664972715946  | 5.62081769892696  | 8.04674575819864  |
| H | 10.19913393970762 | 6.13940310981370  | 7.45602067798542  |
| H | 9.08209930396098  | 4.76077005353136  | 7.47533598477925  |
| H | 8.60114901723197  | 6.30113471221012  | 8.17181011048694  |
| H | 9.19723463307666  | 4.55430072936500  | 11.34101911013124 |
| H | 8.29806663693952  | 3.95979380763108  | 9.93817346238994  |
| H | 8.12376415005072  | 5.64232962460339  | 10.44642158835899 |

## 5. References

- (1) Kovalevsky, A. Yu.; Gembicky, M.; Novozhilova, I. V.; Coppens, P. Solid-State Structure Dependence of the Molecular Distortion and Spectroscopic Properties of the Cu(I) Bis(2,9-Dimethyl-1,10-Phenanthroline) Ion. *Inorg. Chem.* **2003**, *42* (26), 8794–8802. <https://doi.org/10.1021/ic0348805>.
- (2) Cunningham, C. T.; Moore, J. J.; Cunningham, K. L. H.; Fanwick, P. E.; McMillin, D. R. Structural and Photophysical Studies of Cu(NN)<sub>2</sub><sup>+</sup> Systems in the Solid State. Emission at Last from Complexes with Simple 1,10-Phenanthroline Ligands. *Inorg. Chem.* **2000**, *39* (16), 3638–3644. <https://doi.org/10.1021/ic000082s>.
- (3) Kubiček, K.; Thekku Veedu, S.; Storozhuk, D.; Kia, R.; Techert, S. Geometric and Electronic Properties in a Series of Phosphorescent Heteroleptic Cu(I) Complexes: Crystallographic and Computational Studies. *Polyhedron* **2017**, *124*, 166–176. <https://doi.org/10.1016/j.poly.2016.12.035>.
- (4) Smith, C. S.; Branham, C. W.; Marquardt, B. J.; Mann, K. R. Oxygen Gas Sensing by Luminescence Quenching in Crystals of Cu(Xantphos)(Phen) + Complexes. *J. Am. Chem. Soc.* **2010**, *132* (40), 14079–14085. <https://doi.org/10.1021/ja103112m>.
- (5) Hoffmann, A.; Binder, S.; Jesser, A.; Haase, R.; Flörke, U.; Gnida, M.; Salomone Stagni, M.; Meyer-Klaucke, W.; Lebsanft, B.; Grünig, L. E.; Schneider, S.; Hashemi, M.; Goos, A.; Wetzels, A.; Rübhausen, M.; Herres-Pawlis, S. Catching an Entatic State - A Pair of Copper Complexes. *Angew. Chem. - Int. Ed.* **2014**, *53* (1), 299–304. <https://doi.org/10.1002/anie.201306061>.
- (6) Cunningham, K. L.; McMillin, D. R. Reductive Quenching of Photoexcited Cu(Dipp)<sub>2</sub><sup>+</sup> and Cu(Tptap)<sub>2</sub><sup>+</sup> by Ferrocenes (Dipp = 2,9-Diisopropyl-1,10-Phenanthroline and Tptap = 2,3,6,7-Tetraphenyl-1,4,5,8-Tetraazaphenanthrene). *Inorg. Chem.* **1998**, *37* (16), 4114–4119. <https://doi.org/10.1021/ic980213d>.
- (7) Heck, J.; Metz, F.; Buchenau, S.; Teubner, M.; Grimm-Lebsanft, B.; Spaniol, T. P.; Hoffmann, A.; Rübhausen, M. A.; Herres-Pawlis, S. Manipulating Electron Transfer – the Influence of Substituents on Novel Copper Guanidine Quinolinyl Complexes. *Chem. Sci.* **2022**, *13*, 8274–8288. <https://doi.org/10.1039/D2SC02910C>.
- (8) Eggleston, M. K.; McMillin, D. R.; Koenig, K. S.; Pallenberg, A. J. Steric Effects in the Ground and Excited States of Cu(NN)<sub>2</sub><sup>+</sup> Systems. *Inorg. Chem.* **1997**, *36* (2), 172–176. <https://doi.org/10.1021/ic960698a>.
- (9) Gimeno, L.; Blart, E.; Rebilly, J.; Coupeau, M.; Allain, M.; Roisnel, T.; Quarré de Verneuil, A.; Gourlaouen, C.; Daniel, C.; Pellegrin, Y. Non-Symmetrical Sterically Challenged Phenanthroline Ligands and Their Homoleptic Copper(I) Complexes with Improved Excited-State Properties. *Chem. – Eur. J.* **2020**, *26* (51), 11887–11899. <https://doi.org/10.1002/chem.202001209>.
- (10) Neese, F. The ORCA Program System. *Wiley Interdiscip. Rev. Comput. Mol. Sci.* **2012**, *2* (1), 73–78. <https://doi.org/10.1002/wcms.81>.
- (11) Neese, F. Software Update: The ORCA Program System—Version 5.0. *WIREs Comput. Mol. Sci.* **2022**, *12* (5), e1606. <https://doi.org/10.1002/wcms.1606>.
- (12) Staroverov, V. N.; Scuseria, G. E.; Tao, J.; Perdew, J. P. Comparative Assessment of a New Nonempirical Density Functional: Molecules and Hydrogen-Bonded Complexes. *J. Chem. Phys.* **2003**, *119* (23), 12129–12137. <https://doi.org/10.1063/1.1626543>.
- (13) Weigend, F.; Ahlrichs, R. Balanced Basis Sets of Split Valence, Triple Zeta Valence and Quadruple Zeta Valence Quality for H to Rn: Design and Assessment of Accuracy. *Phys. Chem. Chem. Phys.* **2005**, *7* (18), 3297. <https://doi.org/10.1039/b508541a>.
- (14) Neese, F.; Wennmohs, F.; Hansen, A.; Becker, U. Efficient, Approximate and Parallel Hartree–Fock and Hybrid DFT Calculations. A ‘Chain-of-Spheres’ Algorithm for the Hartree–Fock Exchange. *Chem. Phys.* **2009**, *356* (1–3), 98–109. <https://doi.org/10.1016/j.chemphys.2008.10.036>.
- (15) Grimme, S.; Antony, J.; Ehrlich, S.; Krieg, H. A Consistent and Accurate Ab Initio Parametrization of Density Functional Dispersion Correction (DFT-D) for the 94 Elements H–Pu. *J. Chem. Phys.* **2010**, *132* (15), 154104. <https://doi.org/10.1063/1.3382344>.

- (16) Baik, M.-H.; Friesner, R. A. Computing Redox Potentials in Solution: Density Functional Theory as A Tool for Rational Design of Redox Agents. *J. Phys. Chem. A* **2002**, *106* (32), 7407–7412. <https://doi.org/10.1021/jp025853n>.
- (17) Roy, L. E.; Jakubikova, E.; Guthrie, M. G.; Batista, E. R. Calculation of One-Electron Redox Potentials Revisited. Is It Possible to Calculate Accurate Potentials with Density Functional Methods? *J. Phys. Chem. A* **2009**, *113* (24), 6745–6750. <https://doi.org/10.1021/jp811388w>.
- (18) Marenich, A. V.; Cramer, C. J.; Truhlar, D. G. Universal Solvation Model Based on Solute Electron Density and on a Continuum Model of the Solvent Defined by the Bulk Dielectric Constant and Atomic Surface Tensions. *J. Phys. Chem. B* **2009**, *113* (18), 6378–6396. <https://doi.org/10.1021/jp810292n>.
- (19) Pascual-Ahuir, J. L.; Silla, E. GEPOL: An Improved Description of Molecular Surfaces. I. Building the Spherical Surface Set. *J. Comput. Chem.* **1990**, *11* (9), 1047–1060. <https://doi.org/10.1002/jcc.540110907>.
- (20) Silla, E.; Tuñón, I.; Pascual-Ahuir, J. L. GEPOL: An Improved Description of Molecular Surfaces II. Computing the Molecular Area and Volume. *J. Comput. Chem.* **1991**, *12* (9), 1077–1088. <https://doi.org/10.1002/jcc.540120905>.
- (21) Pascual-ahuir, J. L.; Silla, E.; Tuñón, I. GEPOL: An Improved Description of Molecular Surfaces. III. A New Algorithm for the Computation of a Solvent-Excluding Surface. *J. Comput. Chem.* **1994**, *15* (10), 1127–1138. <https://doi.org/10.1002/jcc.540151009>.
- (22) Demissie, T. B.; Ruud, K.; Hansen, J. H. DFT as a Powerful Predictive Tool in Photoredox Catalysis: Redox Potentials and Mechanistic Analysis. *Organometallics* **2015**, *34* (17), 4218–4228. <https://doi.org/10.1021/acs.organomet.5b00582>.
- (23) Sandoval-Pauker, C.; Pinter, B. Electronic Structure Analysis of Copper Photoredox Catalysts Using the Quasi-Restricted Orbital Approach. *J. Chem. Phys.* **2022**, *157* (7), 074306. <https://doi.org/10.1063/5.0094380>.
- (24) Medina, E.; Pinter, B. Electron Density Difference Analysis on the Oxidative and Reductive Quenching Cycles of Classical Iridium and Ruthenium Photoredox Catalysts. *J. Phys. Chem. A* **2020**, *124* (21), 4223–4234. <https://doi.org/10.1021/acs.jpca.9b10238>.
- (25) Medina, E.; Sandoval-Pauker, C.; Salvador, P.; Pinter, B. Mechanistic Insights into the Oxidative and Reductive Quenching Cycles of Transition Metal Photoredox Catalysts through Effective Oxidation State Analysis. *Inorg. Chem.* **2022**, *61* (47), 18923–18933. <https://doi.org/10.1021/acs.inorgchem.2c02945>.
- (26) Medina, E.; Pinter, B. A DFT Study on the Redox Active Behavior of Carbene and Pyridine Ligands in the Oxidative and Reductive Quenching Cycles of Ruthenium Photoredox Catalysts. *Catalysts* **2020**, *10* (1), 80. <https://doi.org/10.3390/catal10010080>.
- (27) Suo, B.; Shen, K.; Li, Z.; Liu, W. Performance of TD-DFT for Excited States of Open-Shell Transition Metal Compounds. *J. Phys. Chem. A* **2017**, *121* (20), 3929–3942. <https://doi.org/10.1021/acs.jpca.7b00752>.
- (28) Jacquemin, D.; Mennucci, B.; Adamo, C. Excited-State Calculations with TD-DFT: From Benchmarks to Simulations in Complex Environments. *Phys. Chem. Chem. Phys.* **2011**, *13* (38), 16987–16998. <https://doi.org/10.1039/c1cp22144b>.
- (29) Kirchhoff, J. R.; Gamache, R. E.; Blaskie, M. W.; Del Paggio, A. A.; Lengel, R. K.; McMillin, D. R. Temperature Dependence of Luminescence from Cu(NN)<sub>2</sub><sup>+</sup> Systems in Fluid Solution. Evidence for the Participation of Two Excited States. *Inorg. Chem.* **1983**, *22* (17), 2380–2384. <https://doi.org/10.1021/ic00159a008>.
- (30) Kuang, S.-M.; Cuttell, D. G.; McMillin, D. R.; Fanwick, P. E.; Walton, R. A. Synthesis and Structural Characterization of Cu(I) and Ni(II) Complexes That Contain the Bis[2-(Diphenylphosphino)Phenyl]Ether Ligand. Novel Emission Properties for the Cu(I) Species. *Inorg. Chem.* **2002**, *41* (12), 3313–3322. <https://doi.org/10.1021/ic0201809>.
- (31) Armaroli, N.; Accorsi, G.; Bergamini, G.; Ceroni, P.; Holler, M.; Moudam, O.; Duhayon, C.; Delavaux-Nicot, B.; Nierengarten, J.-F. Heteroleptic Cu(I) Complexes Containing Phenanthroline-

Type and 1,1'-Bis(Diphenylphosphino)Ferrocene Ligands: Structure and Electronic Properties.  
*Inorganica Chim. Acta* **2007**, 360 (3), 1032–1042. <https://doi.org/10.1016/j.ica.2006.07.085>.
